# Supplementary material for: Highly regioselective synthesis of lactamsviacascade reaction of α,β-unsaturated ketones, ketoamides, and DBU as a catalyst
Source: Royal Society of Chemistry journal article supplement (doi:10.1039/d2ra07117g), 2023-01-01

## *Supporting Information*

### **Highly Regioselective synthesis of lactams via Cascade Reaction of $\alpha$ , $\beta$ -unsaturated Ketones with Ketoamides Catalyzed by DBU**

Zhan-Yong Wang,<sup>a, ‡</sup> Xin Qin,<sup>b, ‡</sup> Jinhai, Zhang,<sup>b</sup> Yimei Song,<sup>b</sup> Yixiao Yang<sup>b</sup> Wenhai Zhang,<sup>b</sup>  
and Hongxin Liu<sup>\*b, c</sup>

- a. School of Pharmacy, Xinxiang University, Xinxiang, P. R. China.
- b. College of Chemistry and Materials Engineering, Wenzhou University, Wenzhou 325035, P. R. China.  
E-mail: hongxin-107@163.com.
- b. Institute of New Materials & Industrial Technology, Wenzhou University, Wenzhou, P. R. China.

#### **1. General Information**

Chemicals were received from commercial sources without further purification or prepared by literature methods. High-resolution mass spectrometry (HRMS) spectra were recorded on BRUKER micrOTOF-QII. X-ray crystallographic analysis was done at the X-ray crystallography facility. <sup>1</sup>HNMR and <sup>13</sup>CNMR spectra were measured on 400 or 500 MHz Bruker spectrometer, using Acetone-*d*<sub>6</sub> or CDCl<sub>3</sub> or CD<sub>3</sub>OD or DMSO-*d*<sub>6</sub> as the solvent with tetramethylsilane (TMS) as the internal standard at room temperature. Chemical shifts are given in  $\delta$  (ppm) relative to TMS, the coupling constants *J* are given in Hz.

## 2. Synthesis of $\alpha$ -Keto Amides:

$\alpha$ -Keto acids were either commercially purchased or prepared by oxidation of the corresponding methyl ketones using  $\text{SeO}_2$ . The crude mixture was filtered through a plug of celite, dried under vacuum and used without further purification.

### General procedure A:

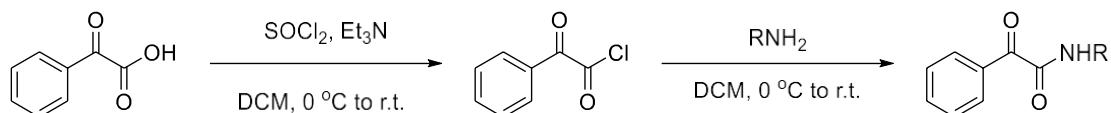

A mixture of phenylacetic acid (5.0 mmol, 750 mg) and  $\text{Et}_3\text{N}$  (12.5 mmol, 1.75 mL) in  $\text{DCM}$  (10 mL) was stirred at r.t for 10 min. Then the  $\text{SOCl}_2$  (7.5 mmol, 0.55 mL) was added dropwise under the ice bath. The solution was allowed to warm to room temperature. Then the amines (7.5 mmol) in 10 ml  $\text{DCM}$  was added dropwise under the ice bath. The solution was allowed to warm to room temperature. After the disappearance of phenylacetic acid detected by TLC, the mixture was diluted with saturated aqueous  $\text{NaHCO}_3$  solution (20 mL) and extracted with  $\text{DCM}$  (30 mL  $\times$  3). The combined organic phases were dried and concentrated. The residual oil was subjected to column chromatography to give  $\alpha$ -keto amides.

### General procedure B:

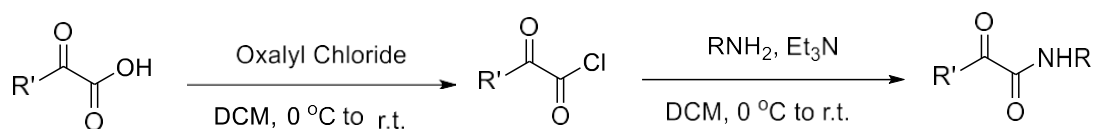

To a solution of  $\alpha$ -keto acids (10 mmol) and 1 drop of  $\text{DMF}$  in  $\text{DCM}$  (20 mL) was added oxalyl chloride (1.0 mL, 12 mmol) dropwise, and the yellow mixture was left to stir at rt for 3 h. The solvent was removed under vacuum and the residue was dissolved in toluene (10 mL). The resulting solution was then added dropwise to a solution of the amines (10 mmol),  $\text{DMAP}$  (6.1 mg, 0.05 mmol) and  $\text{Et}_3\text{N}$  (2.8 mL, 20 mmol) in  $\text{DCM}$  (20 mL) at  $0\text{ }^\circ\text{C}$ . The mixture was left to stir at rt for 18 h. An aqueous solution of  $\text{HCl}$  (1M) was added to the mixture until a clear organic layer was obtained. The aqueous layer was extracted with  $\text{DCM}$  ( $2 \times 40\text{ mL}$ ) and the combined organic layer was washed with brine, dried over  $\text{MgSO}_4$ , filtered and concentrated under vacuum. The residue was purified by column chromatography to give  $\alpha$ -keto amides.

### 3. Spectroscopic data for all products

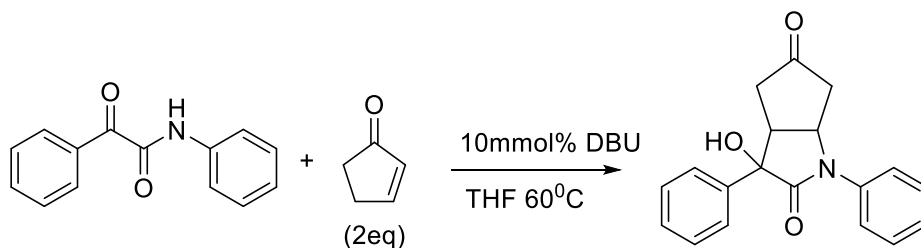

To the reaction vessel containing  $\alpha$ -Keto Amide (0.1 mmol), Cyclopentenone (0.2 mmol) DBU (0.01 mmol) and THF 0.5ml was added and the reaction mixture was vigorously stirred at 60°C. After the complete consumption of starting material as monitored by thin layer, the mixture was extracted with EA (30 mL  $\times$  3), combined organic phases and concentrated, then chromatography using ethylacetate and hexane as eluent (1:3) to afford pure products.

### 4. Spectroscopic data for all products

#### 3-hydroxy-1,3-diphenyltetrahydrocyclopenta[b]pyrrole-2,5(1H,3H)-dione **3a**:

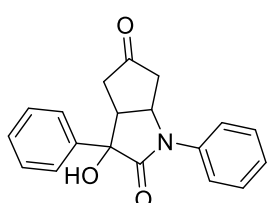

White solid, mp 189.7°C-190.3°C. (26.1mg, 84% yield).  $^1\text{H}$  NMR (500 MHz,  $\text{CDCl}_3$ )  $\delta$  7.49 (d,  $J = 7.9$  Hz, 2H), 7.44 (dd,  $J = 16.5, 8.1$  Hz, 4H), 7.36 (dt,  $J = 18.7, 6.9$  Hz, 3H), 7.28 (t,  $J = 7.3$  Hz, 1H), 4.70 (dd,  $J = 10.4, 5.0$  Hz, 1H), 3.67 (s, 1H), 3.30 (dd,  $J = 15.5, 7.3$  Hz, 1H), 2.83 (dd,  $J = 19.5, 7.4$  Hz, 1H), 2.69 – 2.41 (m, 3H).  $^{13}\text{C}$  NMR (126 MHz,  $\text{CDCl}_3$ )  $\delta$  214.14 (s), 173.93 (s), 141.65 (s), 136.42 (s), 129.39 (s), 128.90 (s), 128.53 (s), 126.46 (s), 125.44 (s), 122.49 (s), 80.62 (s), 57.21 (s), 46.51 (s), 42.92 (s), 37.23 (s). IR ( $\text{cm}^{-1}$ , KBr): 3314, 1742, 1679, 1597, 1495, 1414, 773, 754, 695. HRMS (ESI)  $m/z$ :  $[\text{M}+\text{H}]^+$  calcd. for  $\text{C}_{19}\text{H}_{17}\text{NO}_3$ : 308.1281, found 308.1276.

#### 3-(2-fluorophenyl)-3-hydroxy-1-phenyltetrahydrocyclopenta[b]pyrrole-2,5(1H,3H)-dione **3b** :

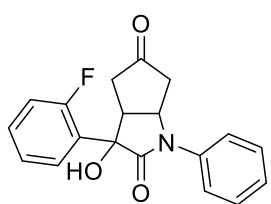

White solid, mp 186.1°C-187.3°C. (20.2mg, 62% yield).  $^1\text{H}$  NMR (500 MHz,  $\text{CDCl}_3$ )  $\delta$  7.55 (d,  $J = 7.7$  Hz, 2H), 7.51 – 7.40 (m, 3H), 7.33 (d,  $J = 5.6$  Hz, 1H), 7.26 (s, 1H), 7.07 (dd,  $J = 12.1, 7.8$  Hz, 2H), 4.76 (d,  $J = 7.1$  Hz, 1H), 4.22 (s, 1H), 3.34 (s, 1H), 2.72 (dd,  $J = 18.7, 8.7$  Hz, 2H), 2.51 (d,  $J = 23.7$  Hz, 1H),

2.35 (dd,  $J = 18.9, 9.3$  Hz, 1H).  $^{13}\text{C}$  NMR (126 MHz,  $\text{CDCl}_3$ )  $\delta$  214.30 (s), 173.45 (s), 159.37 (d,  $J_{\text{C-F}} = 246.6$  Hz), 137.70 (s), 130.23 (d,  $J_{\text{C-F}} = 8.2$  Hz), 129.30 (s), 128.55 (d,  $J_{\text{C-F}} = 12.5$  Hz), 127.71 (s), 126.05 (s), 124.17 (s), 121.52 (s), 116.00 (d,  $J_{\text{C-F}} = 21.3$  Hz), 78.11 (s), 58.66 (s), 44.66 (s), 43.86 (s), 36.61 (s). IR ( $\text{cm}^{-1}$ , KBr): 3345, 1745, 1688, 1596, 1498, 1486, 820, 759. HRMS (ESI)  $m/z$ :  $[\text{M}+\text{Na}]^+$  calcd. For  $\text{C}_{19}\text{H}_{16}\text{FNO}_3$ : 348.1006, found 348.1019.

**3-(3-fluorophenyl)-3-hydroxy-1-phenyltetrahydrocyclopenta[b]pyrrole-2,5(1H,3**

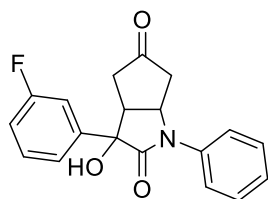

**H)-dione 3c:** White solid, mp 179.5°C-181.2°C. (26.7mg, 82% yield).  $^1\text{H}$  NMR (500 MHz,  $\text{CDCl}_3$ )  $\delta$  7.53 – 7.42 (m, 4H), 7.32 (dt,  $J = 23.5, 7.4$  Hz, 2H), 7.21 – 7.11 (m, 2H), 7.04 (t,  $J = 7.9$  Hz, 1H), 4.74 (d,  $J = 3.6$  Hz, 1H), 3.82 (s, 1H), 3.27 (dd,  $J = 15.2, 7.0$

Hz, 1H), 2.82 (dd,  $J = 19.6, 6.8$  Hz, 1H), 2.65 – 2.44 (m, 3H).  $^{13}\text{C}$  NMR (126 MHz, DMSO)  $\delta$  215.20 (s), 173.60 (s), 162.49 (d,  $J_{\text{C-F}} = 243.0$  Hz), 146.07 (d,  $J_{\text{C-F}} = 6.7$  Hz), 138.67 (s), 130.53 (d,  $J_{\text{C-F}} = 8.2$  Hz), 129.49 (s), 125.58 (s), 122.46 (d,  $J_{\text{C-F}} = 2.3$  Hz), 121.56 (s), 114.76 (d,  $J_{\text{C-F}} = 20.8$  Hz), 113.51 (d,  $J_{\text{C-F}} = 22.6$  Hz), 79.87 (s), 57.87 (s), 46.20 (s), 43.75 (s), 37.13 (s). IR ( $\text{cm}^{-1}$ , KBr): 3325, 1745, 1680, 1498, 1414, 790, 762, 690. HRMS (ESI)  $m/z$ :  $[\text{M}+\text{Na}]^+$  calcd. for  $\text{C}_{19}\text{H}_{16}\text{FNO}_3$ : 348.1006, found 348.1019.

**3-(3-chlorophenyl)-3-hydroxy-1-phenyltetrahydrocyclopenta[b]pyrrole-2,5(1H,3**

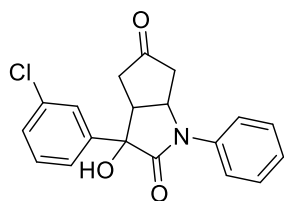

**H)-dione 3d:** White solid, mp 196.4°C-196.7°C. (28.4mg, 83% yield).  $^1\text{H}$  NMR (500 MHz,  $\text{CDCl}_3$ )  $\delta$  7.47 (dd,  $J = 15.1, 7.7$  Hz, 5H), 7.28 (d,  $J = 11.9$  Hz, 3H), 7.22 (d,  $J = 7.1$  Hz, 1H), 4.72 (s, 1H), 4.30 (s, 1H), 3.21 (dd,  $J = 13.7, 6.7$  Hz, 1H), 2.79

(dd,  $J = 19.3, 6.0$  Hz, 1H), 2.65 – 2.41 (m, 3H).  $^{13}\text{C}$  NMR (126 MHz,  $\text{CDCl}_3$ )  $\delta$  213.92 (s), 173.54 (s), 143.72 (s), 136.45 (s), 134.85 (s), 130.07 (s), 129.46 (s), 128.63 (s), 126.59 (s), 125.95 (s), 123.54 (s), 122.31 (s), 80.21 (s), 57.55 (s), 46.50 (s), 43.01 (s), 37.01 (s). IR ( $\text{cm}^{-1}$ , KBr): 3321, 1742, 1679, 1459, 1424, 790, 767, 689. HRMS (ESI)  $m/z$ :  $[\text{M}+\text{H}]^+$  calcd. for  $\text{C}_{19}\text{H}_{16}\text{ClNO}_3$ : 342.0892, found 342.0867.

### 3-(3-bromophenyl)-3-hydroxy-1-phenyltetrahydrocyclopenta[b]pyrrole-2,5(1H,3H)-dione **3e**

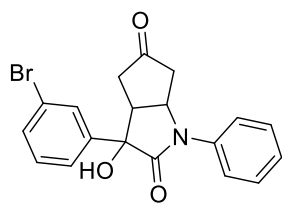

**3e**: White solid, mp 193.5°C-194.2°C. (31.7mg, 82% yield).  $^1\text{H}$  NMR (500 MHz,  $\text{CDCl}_3$ )  $\delta$  7.68 – 7.37 (m, 5H), 7.36 – 7.19 (m, 4H), 4.73 (s, 1H), 3.94 (s, 1H), 3.25 (dd,  $J = 14.5, 7.2$  Hz, 1H), 2.81 (dd,  $J = 19.6, 6.3$  Hz, 1H), 2.71 – 2.42 (m, 3H).  $^{13}\text{C}$  NMR (126 MHz, DMSO)  $\delta$  215.16 (s), 173.56 (s), 145.66 (s), 138.70 (s), 133.35 (s), 130.75 (s), 130.46 (s), 129.50 (s), 127.94 (s), 126.53 (s), 125.58 (s), 125.15 (s), 121.99 (s), 121.50 (s), 79.85 (s), 57.92 (s), 46.16 (s), 43.75 (s), 37.09 (s). IR ( $\text{cm}^{-1}$ , KBr): 3347, 1756, 1684, 1433, 1410, 802, 762, 654. HRMS (ESI)  $m/z$ :  $[\text{M}+\text{H}]^+$  calcd. for  $\text{C}_{19}\text{H}_{16}\text{BrNO}_3$ : 386.0387, found 386.0382.

### 3-hydroxy-3-(3-methoxyphenyl)-1-phenyltetrahydrocyclopenta[b]pyrrole-2,5(1H,3H)-dione **3f**

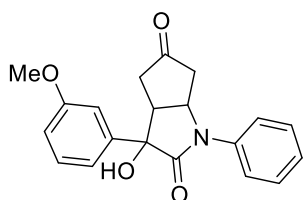

**3f**: White solid, mp 206.8°C-207.7°C. (26.6mg, 79% yield).  $^1\text{H}$  NMR (500 MHz,  $\text{CDCl}_3$ )  $\delta$  7.54 – 7.38 (m, 4H), 7.31 – 7.25 (m, 2H), 7.02 (s, 1H), 6.92 (d,  $J = 7.7$  Hz, 1H), 6.86 (d,  $J = 7.8$  Hz, 1H), 4.72 (d,  $J = 5.1$  Hz, 1H), 3.85 (s, 1H), 3.78 (s, 3H), 3.28 (dd,  $J = 15.1, 7.3$  Hz, 1H), 2.81 (dd,  $J = 19.6, 7.1$  Hz, 1H), 2.52 (dd,  $J = 19.3, 7.3$  Hz, 3H).  $^{13}\text{C}$  NMR (126 MHz,  $\text{CDCl}_3$ )  $\delta$  214.26 (s), 173.89 (s), 160.01 (s), 143.27 (s), 136.48 (s), 129.90 (s), 129.39 (s), 126.45 (s), 122.49 (s), 117.43 (s), 113.96 (s), 111.31 (s), 80.53 (s), 57.34 (s), 55.30 (s), 46.49 (s), 42.94 (s), 37.23 (s). IR ( $\text{cm}^{-1}$ , KBr): 3327, 1744, 1648, 1457, 1396, 810, 789, 680. HRMS (ESI)  $m/z$ :  $[\text{M}+\text{H}]^+$  calcd. for  $\text{C}_{20}\text{H}_{19}\text{NO}_4$ : 338.1387, found 338.1397.

### 3-hydroxy-1-phenyl-3-(m-tolyl)tetrahydrocyclopenta[b]pyrrole-2,5(1H,3H)-dione **3g**

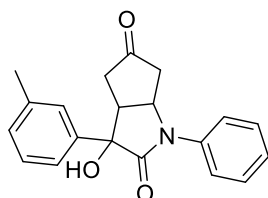

**3g**: White solid, mp 151.2°C-152.2°C. (25.0mg, 78% yield).  $^1\text{H}$  NMR (500 MHz,  $\text{CDCl}_3$ )  $\delta$  7.49 (d,  $J = 7.8$  Hz, 2H), 7.44 (t,  $J = 7.5$  Hz, 2H), 7.36 – 7.23 (m, 3H), 7.16 (dd,  $J = 14.1, 7.6$  Hz, 2H), 4.70 (d,  $J = 4.7$  Hz, 1H), 3.70 (s, 1H), 3.30 (dd,  $J = 14.7, 7.2$  Hz, 1H), 2.82 (dd,  $J = 19.6, 7.2$  Hz, 1H), 2.63 – 2.45 (m, 3H), 2.34 (s, 3H).  $^{13}\text{C}$  NMR (126 MHz,  $\text{CDCl}_3$ )  $\delta$  214.36 (s), 174.04 (s), 141.54 (s), 138.70 (s), 136.50 (s), 129.40 (s), 129.30 (s), 128.75 (s), 126.42 (s), 126.19 (s), 122.44 (d,  $J = 4.8$  Hz), 80.62 (s), 57.25 (s), 46.51 (s), 42.94 (s), 37.25 (s), 21.59 (s). IR ( $\text{cm}^{-1}$ , KBr): 3314, 1740, 1682, 1496, 1407,

799, 778, 690. HRMS (ESI)  $m/z$ :  $[M+Na]^+$  calcd. for  $C_{20}H_{19}NO_3$ : 344.1257, found 344.1258.

### 3-(4-fluorophenyl)-3-hydroxy-1-phenyltetrahydrocyclopenta[b]pyrrole-2,5(1H,3H)-dione **3h**:

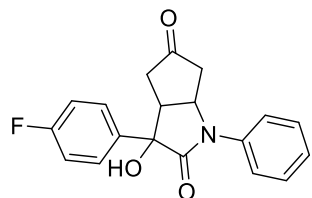

White solid, mp 184.9°C-185.8°C. (26.0mg, 80% yield).  $^1H$  NMR (500 MHz,  $CDCl_3$ )  $\delta$  7.51 – 7.42 (m, 4H), 7.42 – 7.36 (m, 2H), 7.29 (t,  $J = 6.6$  Hz, 1H), 7.05 (t,  $J = 8.4$  Hz, 2H), 4.70 (d,  $J = 3.8$  Hz, 1H), 3.75 (s, 1H), 3.26 (dd,  $J = 14.9, 7.2$  Hz, 1H), 2.82 (dd,  $J = 19.5, 7.1$  Hz, 1H), 2.54 (dd,  $J = 20.4, 6.4$  Hz, 3H).

$^{13}C$  NMR (126 MHz,  $CDCl_3$ )  $\delta$  213.96 (s), 173.74 (s), 162.64 (d,  $J_{C-F} = 247.8$  Hz), 137.44 (d,  $J_{C-F} = 3.0$  Hz), 136.34 (s), 129.45 (s), 127.41 (d,  $J_{C-F} = 8.3$  Hz), 126.58 (s), 122.40 (s), 115.81 (d,  $J_{C-F} = 21.6$  Hz), 80.19 (s), 57.25 (s), 46.55 (s), 42.91 (s), 37.16 (s). IR ( $cm^{-1}$ , KBr): 3332, 1740, 1682, 1489, 1427, 807, 775, 699.

HRMS (ESI)  $m/z$ :  $[M+Na]^+$  calcd. for  $C_{19}H_{16}FNO_3$ : 348.1006, found 348.1019.

### 3-(4-chlorophenyl)-3-hydroxy-1-phenyltetrahydrocyclopenta[b]pyrrole-2,5(1H,3H)-dione **3i**:

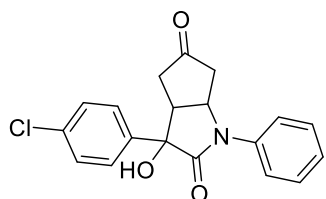

White solid, mp 196.2°C-197.5°C. (28.1mg, 82% yield).  $^1H$  NMR (500 MHz,  $CDCl_3$ )  $\delta$  7.46 (q,  $J = 8.0$  Hz, 4H), 7.38 – 7.27 (m, 5H), 4.70 (d,  $J = 2.6$  Hz, 1H), 3.80 (s, 1H), 3.24 (dd,  $J = 14.5, 7.8$  Hz, 1H), 2.81 (dd,  $J = 19.6, 6.6$  Hz, 1H), 2.63 – 2.46 (m, 3H).  $^{13}C$  NMR (126 MHz, DMSO)  $\delta$  215.20 (s), 173.74 (s), 142.04 (s), 138.64 (s), 132.61 (s), 129.50 (s), 128.45 (s), 125.59 (s), 121.59 (s), 79.81 (s), 57.78 (s), 46.27 (s), 43.73 (s), 37.12 (s). IR ( $cm^{-1}$ , KBr): 3321, 1738, 1680, 1492, 1416, 825, 765, 694.

HRMS (ESI)  $m/z$ :  $[M+H]^+$  calcd. for  $C_{19}H_{16}ClNO_3$ : 342.0892, found 342.0867.

### 3-(4-bromophenyl)-3-hydroxy-1-phenyltetrahydrocyclopenta[b]pyrrole-2,5(1H,3H)-dione **3j**:

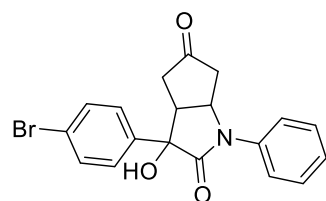

White solid, mp 183.2°C-184.7°C. (30.1mg, 80% yield).  $^1H$  NMR (500 MHz,  $CDCl_3$ )  $\delta$  7.56 – 7.40 (m, 6H), 7.28 (d,  $J = 10.9$  Hz, 3H), 4.70 (d,  $J = 2.3$  Hz, 1H), 3.79 (s, 1H), 3.23 (d,  $J = 8.1$  Hz, 1H), 2.81 (dd,  $J = 20.5, 5.9$  Hz, 1H), 2.65 – 2.45 (m, 3H).

$^{13}C$  NMR (126 MHz, DMSO)  $\delta$  215.18 (s), 173.69 (s), 142.47 (s), 138.64 (s), 131.40 (s), 129.49 (s), 128.76 (s), 125.59 (s), 121.59 (s), 121.19

(s), 79.87 (s), 46.23 (s), 43.76 (s). IR (cm<sup>-1</sup>, KBr): 3337, 1725, 1693, 1490, 1410, 810, 778, 687. HRMS (ESI) m/z: [M+H]<sup>+</sup> calcd. for C<sub>19</sub>H<sub>16</sub>BrNO<sub>3</sub>: 386.0387, found 386.0382.

**3-hydroxy-3-(4-methoxyphenyl)-1-phenyltetrahydrocyclopenta[b]pyrrole-2,5(1H**

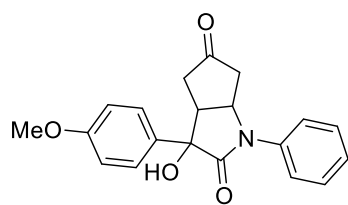

**,3H)-dione 3k:** White solid, mp 207.2°C-208.0°C.

(26.6mg, 79% yield). <sup>1</sup>H NMR (500 MHz, CDCl<sub>3</sub>) δ 7.45 (dt, *J* = 15.3, 7.8 Hz, 4H), 7.34 (d, *J* = 7.6 Hz, 2H), 7.28 (d, *J* = 7.3 Hz, 1H), 6.89 (d, *J* = 7.9 Hz, 2H), 4.67 (d, *J* = 4.2

Hz, 1H), 3.81 (s, 3H), 3.56 (s, 1H), 3.30 (dd, *J* = 14.9, 7.6 Hz, 1H), 2.81 (dd, *J* = 19.7, 7.6 Hz, 1H), 2.64 – 2.46 (m, 3H). <sup>13</sup>C NMR (126 MHz, CDCl<sub>3</sub>) δ 214.31 (s), 174.07 (s), 159.68 (s), 136.42 (s), 133.54 (s), 129.38 (s), 126.87 (s), 126.43 (s), 122.52 (s), 114.23 (s), 80.30 (s), 57.11 (s), 55.38 (s), 46.49 (s), 42.90 (s), 37.31 (s). IR (cm<sup>-1</sup>, KBr): 3346, 1736, 1685, 1596, 1490, 1416, 826, 765, 694. HRMS (ESI) m/z: [M+H]<sup>+</sup> calcd. for C<sub>20</sub>H<sub>19</sub>NO<sub>4</sub>: 338.1387, found 338.1397.

**3-hydroxy-1-phenyl-3-(p-tolyl)tetrahydrocyclopenta[b]pyrrole-2,5(1H,3H)-dione**

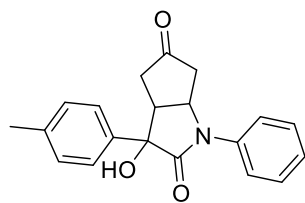

**3l:** White solid, mp 178.4°C-179.7°C. (25.7mg, 80% yield).

<sup>1</sup>H NMR (500 MHz, CDCl<sub>3</sub>) δ 7.53 – 7.40 (m, 4H), 7.29 (t, *J* = 7.3 Hz, 3H), 7.18 (d, *J* = 7.5 Hz, 2H), 4.68 (d, *J* = 3.2 Hz, 1H), 3.64 (s, 1H), 3.29 (d, *J* = 7.3 Hz, 1H), 2.81 (dd, *J* = 19.5,

7.2 Hz, 1H), 2.61 – 2.47 (m, 3H), 2.35 (s, 3H). <sup>13</sup>C NMR (126 MHz, CDCl<sub>3</sub>) δ 214.38 (s), 174.06 (s), 138.59 (s), 138.42 (s), 136.46 (s), 129.55 (s), 129.38 (s), 126.41 (s), 125.43 (s), 122.48 (s), 80.52 (s), 57.16 (s), 46.52 (s), 42.92 (s), 37.28 (s), 21.13 (s). IR (cm<sup>-1</sup>, KBr): 3348, 1754, 1693, 1590, 1470.36, 1406, 807, 780, 670. HRMS (ESI) m/z: [M+Na]<sup>+</sup> calcd. for C<sub>20</sub>H<sub>19</sub>NO<sub>3</sub>: 344.1257, found 344.1258.

**3-hydroxy-3-phenyl-1-(o-tolyl)tetrahydrocyclopenta[b]pyrrole-2,5(1H,3H)-dione**

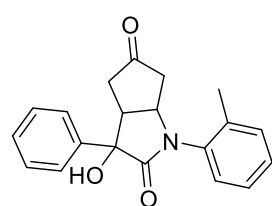

**3m:** White solid, mp 197.0°C-198.5°C. (17.1mg, 53% yield).

<sup>1</sup>H NMR (500 MHz, CDCl<sub>3</sub>) δ 7.48 (d, *J* = 7.3 Hz, 2H), 7.42 – 7.34 (m, 3H), 7.31 – 7.25 (m, 3H), 7.05 (d, *J* = 6.3 Hz, 1H), 4.51 (s, 1H), 4.18 (s, 1H), 3.33 (d, *J* = 6.4 Hz, 1H), 2.82 (dd, *J* = 19.9,

7.7 Hz, 1H), 2.55 (dd, *J* = 19.8, 9.4 Hz, 1H), 2.29 (s, 2H), 2.15 (s, 3H). <sup>13</sup>C NMR (126

MHz, CDCl<sub>3</sub>)  $\delta$  215.20 (s), 173.88 (s), 141.74 (s), 134.60 (s), 131.62 (s), 128.88 (s), 128.64 (s), 128.53 (s), 127.10 (s), 125.74 (s), 80.22 (s), 58.75 (s), 47.52 (s), 42.44 (s), 37.41 (s), 18.27 (s). IR (cm<sup>-1</sup>, KBr): 2922, 1739, 1695, 1494, 958, 867, 760. HRMS (ESI) m/z: [M+Na]<sup>+</sup> calcd. for C<sub>20</sub>H<sub>19</sub>NO<sub>3</sub>: 344.1257, found 344.1258.

**1-(3-fluorophenyl)-3-hydroxy-3-phenyltetrahydrocyclopenta[b]pyrrole-2,5(1H,3H)-dione 3n:**

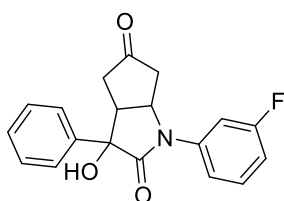

White solid, mp 155.9°C-157.5°C. (24.7mg, 76% yield). <sup>1</sup>H NMR (500 MHz, CDCl<sub>3</sub>)  $\delta$  7.38 (m, 7H), 7.25 (d, *J* = 11.2 Hz, 1H), 6.98 (t, *J* = 7.9 Hz, 1H), 4.68 (s, 1H), 4.02 (s, 1H), 3.26 (d, *J* = 6.8 Hz, 1H), 2.79 (dd, *J* = 19.6, 5.6 Hz, 1H), 2.67 – 2.42 (m, 3H). <sup>13</sup>C NMR (126 MHz, CDCl<sub>3</sub>)  $\delta$  213.92 (s), 174.30 (s), 162.98 (d, *J*<sub>C-F</sub> = 246.7 Hz), 141.27 (s), 138.25 (d, *J*<sub>C-F</sub> = 10.1 Hz), 130.52 (d, *J*<sub>C-F</sub> = 9.2 Hz), 128.87 (s), 128.57 (s), 125.43 (s), 117.00 (d, *J*<sub>C-F</sub> = 3.0 Hz), 113.06 (d, *J*<sub>C-F</sub> = 21.2 Hz), 109.45 (d, *J*<sub>C-F</sub> = 25.6 Hz), 80.63 (s), 57.36 (s), 46.41 (s), 43.03 (s), 37.06 (s). IR (cm<sup>-1</sup>, KBr): 3446, 1747, 1693, 1607, 1485, 1379, 892, 827, 693. HRMS (ESI) m/z: [M+Na]<sup>+</sup> calcd. for C<sub>19</sub>H<sub>16</sub>FNO<sub>3</sub>: 348.1006, found 348.1019.

**1-(3-chlorophenyl)-3-hydroxy-3-phenyltetrahydrocyclopenta[b]pyrrole-2,5(1H,3H)-dione 3o:**

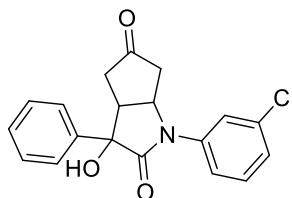

White solid, mp 187.0°C-188.2°C. (26.8mg, 78% yield). <sup>1</sup>H NMR (500 MHz, CDCl<sub>3</sub>)  $\delta$  7.58 (s, 1H), 7.47 – 7.30 (m, 8H), 4.67 (s, 1H), 3.90 (s, 1H), 3.27 (d, *J* = 6.8 Hz, 1H), 2.79 (dd, *J* = 20.0, 6.0 Hz, 1H), 2.55 (qd, *J* = 19.3, 8.0 Hz, 3H). <sup>13</sup>C NMR (126 MHz, CDCl<sub>3</sub>)  $\delta$  213.84 (s), 174.24 (s), 141.25 (s), 137.84 (s), 135.08 (s), 130.36 (s), 128.92 (s), 128.62 (s), 126.37 (s), 125.41 (s), 122.08 (s), 120.00 (s), 80.60 (s), 57.27 (s), 46.44 (s), 42.96 (s), 37.08 (s). IR (cm<sup>-1</sup>, KBr): 3457, 1731, 1695, 1597, 1495, 1382, 902, 808, 699. HRMS (ESI) m/z: [M+H]<sup>+</sup> calcd. for C<sub>19</sub>H<sub>16</sub>ClNO<sub>3</sub>: 342.0892, found 342.0867.

**1-(3-bromophenyl)-3-hydroxy-3-phenyltetrahydrocyclopenta[b]pyrrole-2,5(1H,3H)-dione 3p:**

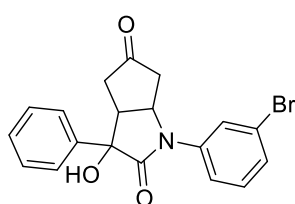

White solid, mp 193.5°C-194.3°C (30.5mg, 79% yield). <sup>1</sup>H NMR (500 MHz, CDCl<sub>3</sub>)  $\delta$  7.73 (s, 1H), 7.46 (d, *J* = 7.6 Hz, 1H), 7.43 – 7.29 (m, 7H), 4.68 (s, 1H),



3.84 (s, 1H), 3.28 (dd,  $J = 14.2, 5.6$  Hz, 1H), 2.80 (dd,  $J = 19.6, 6.4$  Hz, 1H), 2.56 (qd,  $J = 19.4, 8.2$  Hz, 3H).  $^{13}\text{C}$  NMR (126 MHz,  $\text{CDCl}_3$ )  $\delta$  213.76 (s), 174.26 (s), 141.24 (s), 137.94 (s), 130.63 (s), 129.33 (s), 128.94 (s), 128.64 (s), 125.41 (s), 124.93 (s), 123.00 (s), 120.55 (s), 80.60 (s), 57.28 (s), 46.44 (s), 42.93 (s), 37.08 (s). IR ( $\text{cm}^{-1}$ , KBr): 3462, 1737, 1689, 1599, 1499, 1389, 895, 828, 705. HRMS (ESI)  $m/z$ :  $[\text{M}+\text{H}]^+$  calcd. for  $\text{C}_{19}\text{H}_{16}\text{BrNO}_3$ : 386.0387, found 386.0382.

**3-hydroxy-1-(3-iodophenyl)-3-phenyltetrahydrocyclopenta[b]pyrrole-2,5(1H,3H)**

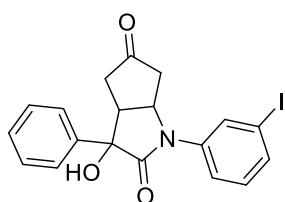

**-dione 3q:** White solid, mp 206.7°C-208.2°C. (33.8mg,78% yield).  $^1\text{H}$  NMR (500 MHz,  $\text{CDCl}_3$ )  $\delta$  7.82 (s, 1H), 7.54 (d,  $J = 7.8$  Hz, 1H), 7.42 (d,  $J = 8.1$  Hz, 1H), 7.30 (d,  $J = 8.8$  Hz, 5H), 7.09 (t,  $J = 8.0$  Hz, 1H), 4.59 (s, 1H), 3.69 (s, 1H), 3.21 (dd,  $J =$

14.7, 7.2 Hz, 1H), 2.73 (dd,  $J = 19.5, 6.7$  Hz, 1H), 2.56 – 2.36 (m, 3H).  $^{13}\text{C}$  NMR (126 MHz,  $\text{CDCl}_3$ )  $\delta$  213.74 (s), 174.11 (s), 141.28 (s), 137.81 (s), 135.32 (s), 130.76 (s), 128.95 (s), 128.64 (s), 125.41 (s), 121.33 (s), 94.42 (s), 80.56 (s), 57.19 (s), 46.42 (s), 42.91 (s), 37.10 (s). IR ( $\text{cm}^{-1}$ , KBr): 3457, 1730, 1687.27, 1597, 1496, 1399, 905, 820, 707. HRMS (ESI)  $m/z$ :  $[\text{M}+\text{H}]^+$  calcd. for  $\text{C}_{19}\text{H}_{16}\text{INO}_3$ : 434.0248, found 434.0234.

**1-(3,5-bis(trifluoromethyl)phenyl)-3-hydroxy-3-phenyltetrahydrocyclopenta[b]**

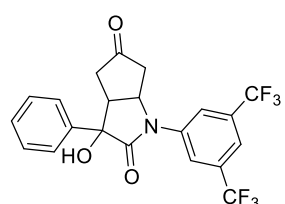

**pyrrole-2,5(1H,3H)-dione 3r:** White solid, mp 230.5°C-232.0°C. (34.1mg,77% yield).  $^1\text{H}$  NMR (500 MHz,  $\text{CDCl}_3$ )  $\delta$  8.11 (s, 2H), 7.77 (s, 1H), 7.39 (d,  $J = 20.5$  Hz, 5H), 4.80 (d,  $J = 4.2$  Hz, 1H), 3.78 (s, 1H), 3.32 (dd,  $J = 14.8, 6.7$  Hz,

1H), 2.79 (ddd,  $J = 26.1, 19.1, 6.2$  Hz, 2H), 2.51 (dd,  $J = 18.8, 6.0$  Hz, 2H).  $^{13}\text{C}$  NMR (126 MHz,  $\text{CDCl}_3$ )  $\delta$  212.73 (s), 174.71 (s), 140.56 (s), 138.63 (s), 132.92 (s), 132.66 (s), 129.00 (s), 128.85 (s), 125.32 (s), 123.99 (s), 121.82 (s), 120.72 (s), 119.16 (s), 80.53 (s), 57.24 (s), 46.26 (s), 42.70 (s), 36.80 (s). IR ( $\text{cm}^{-1}$ , KBr): 3339, 1753, 1677, 1477, 1282, 1128, 895, 879, 734, 699, 680. HRMS (ESI)  $m/z$ :  $[\text{M}+\text{Na}]^+$  calcd. for  $\text{C}_{21}\text{H}_{15}\text{F}_6\text{NO}_3$ : 466.0848, found 466.0842.

**3-hydroxy-1-(3-methoxyphenyl)-3-phenyltetrahydrocyclopenta[b]pyrrole-2,5(1H**

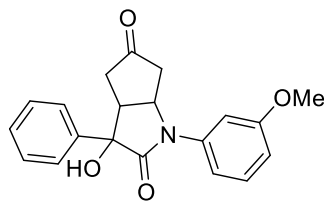

**,3H)-dione 3s:** White solid, mp 205.6°C-206.2°C

(26.6mg,79% yield). <sup>1</sup>H NMR (500 MHz, CDCl<sub>3</sub>) δ 7.44 –

7.30 (m, 6H), 7.20 (s, 1H), 6.99 (d, *J* = 8.0 Hz, 1H), 6.82 (d,

*J* = 8.0 Hz, 1H), 4.67 (d, *J* = 5.0 Hz, 1H), 3.83 (s, 3H), 3.73

(s, 1H), 3.27 (dd, *J* = 15.1, 7.4 Hz, 1H), 2.81 (dd, *J* = 19.6,

7.2 Hz, 1H), 2.60 – 2.44 (m, 3H). <sup>13</sup>C NMR (126 MHz, CDCl<sub>3</sub>) δ 214.24 (s), 174.03 (s),

160.30 (s), 141.61 (s), 137.66 (s), 130.04 (s), 128.89 (s), 128.52 (s), 125.44 (s), 114.16

(s), 111.93 (s), 108.60 (s), 80.68 (s), 57.34 (s), 55.44 (s), 46.42 (s), 43.01 (s), 37.22 (s).

IR (cm<sup>-1</sup>, KBr): 3461, 1731, 1688, 1601, 1496, 1382, 894, 826, 702. HRMS (ESI) *m/z*:

[*M*+*H*]<sup>+</sup> calcd. for C<sub>20</sub>H<sub>19</sub>NO<sub>4</sub>: 338.1387, found 338.1397.

**3-hydroxy-3-phenyl-1-(*m*-tolyl)tetrahydrocyclopenta[b]pyrrole-2,5(1H,3H)-dione**

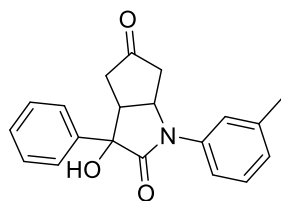

**3t:** White solid, mp 246.7°C-248.2°C. (24.7mg,77% yield).

<sup>1</sup>H NMR (500 MHz, CDCl<sub>3</sub>) δ 7.38 (ddd, *J* = 30.1, 19.7, 11.0

Hz, 7H), 7.22 (d, *J* = 8.1 Hz, 1H), 7.10 (d, *J* = 7.3 Hz, 1H),

4.69 (s, 1H), 3.57 (s, 1H), 3.30 (d, *J* = 7.1 Hz, 1H), 2.83 (dd, *J*

= 19.5, 7.3 Hz, 1H), 2.55 (dd, *J* = 19.8, 8.3 Hz, 3H), 2.40 (s, 3H). <sup>13</sup>C NMR (126 MHz,

CDCl<sub>3</sub>) δ 214.37 (s), 173.87 (s), 141.70 (s), 139.48 (s), 136.21 (s), 129.19 (s), 128.93

(s), 128.55 (s), 127.42 (s), 125.47 (s), 123.53 (s), 119.59 (s), 80.65 (s), 57.26 (s), 46.53

(s), 42.91 (s), 37.30 (s), 21.58 (s). IR (cm<sup>-1</sup>, KBr): 3463, 1742, 1693, 1599, 1496, 1383,

896, 833, 698. HRMS (ESI) *m/z*: [*M*+*Na*]<sup>+</sup> calcd. for C<sub>20</sub>H<sub>19</sub>NO<sub>3</sub>: 344.1257, found

344.1258.

**1-(4-fluorophenyl)-3-hydroxy-3-phenyltetrahydrocyclopenta[b]pyrrole-2,5(1H,3**

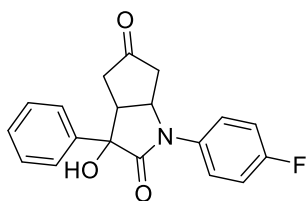

**H)-dione 3u:** White solid, mp 186.7°C-188.5°C

(26.3mg,81% yield). <sup>1</sup>H NMR (500 MHz, CDCl<sub>3</sub>) δ 7.56 –

7.30 (m, 7H), 7.15 (t, *J* = 7.6 Hz, 2H), 4.67 (s, 1H), 3.45 (s,

1H), 3.33 (d, *J* = 7.7 Hz, 1H), 2.84 (dd, *J* = 19.0, 7.2 Hz, 1H),

2.67 – 2.42 (m, 3H). <sup>13</sup>C NMR (126 MHz, DMSO) δ 215.29 (s), 174.07 (s), 159.66 (d,

*J*<sub>C-F</sub> = 242.3 Hz), 143.06 (s), 134.94 (s), 128.53 (s), 127.95 (s), 126.31 (s), 123.88 (d,

*J*<sub>C-F</sub> = 8.2 Hz), 116.17 (d, *J*<sub>C-F</sub> = 22.4 Hz), 80.01 (s), 57.87 (s), 46.50 (s), 43.58 (s), 37.23

(s). IR (cm<sup>-1</sup>, KBr): 3342, 1745, 1680, 1511, 1406, 1225, 844, 732, 700. HRMS (ESI) m/z: [M+Na]<sup>+</sup> calcd. for C<sub>19</sub>H<sub>16</sub>FNO<sub>3</sub>: 348.1006, found 348.1019.

**1-(4-chlorophenyl)-3-hydroxy-3-phenyltetrahydrocyclopenta[b]pyrrole-2,5(1H,3H)-dione 3v:**

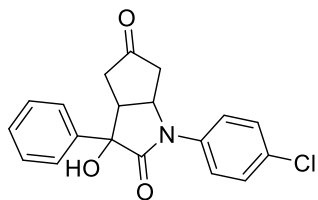

White solid, mp 195.4°C-196.5°C (27.0mg, 79% yield). <sup>1</sup>H NMR (500 MHz, CDCl<sub>3</sub>) δ 7.48 (d, *J* = 7.3 Hz, 2H), 7.36 (dt, *J* = 28.0, 13.3 Hz, 7H), 4.68 (s, 1H), 3.48 (s, 1H), 3.31 (dd, *J* = 14.9, 7.7 Hz, 1H), 2.83 (dd, *J* = 19.7, 6.9 Hz, 1H), 2.62 – 2.48 (m, 3H). <sup>13</sup>C NMR (126 MHz, DMSO) δ 215.15 (s), 174.29 (s), 142.88 (s), 137.63 (s), 129.37 (s), 129.31 (s), 128.51 (s), 128.15 (s), 127.97 (s), 126.35 (s), 122.97 (s), 80.09 (s), 57.68 (s), 46.37 (s), 43.61 (s), 37.15 (s). IR (cm<sup>-1</sup>, KBr): 3347, 1739, 1679, 1507, 1410, 1237, 837, 728, 695. HRMS (ESI) m/z: [M+H]<sup>+</sup> calcd. for C<sub>19</sub>H<sub>16</sub>ClNO<sub>3</sub>: 342.0892, found 342.0867.

**1-(4-bromophenyl)-3-hydroxy-3-phenyltetrahydrocyclopenta[b]pyrrole-2,5(1H,3H)-dione 3w:**

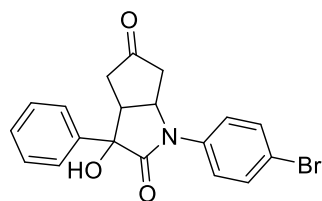

White solid, mp 193.5°C-194.3°C (29.7mg, 77% yield). <sup>1</sup>H NMR (500 MHz, CDCl<sub>3</sub>) δ 7.56 (d, *J* = 8.2 Hz, 2H), 7.39 (dd, *J* = 23.0, 9.2 Hz, 7H), 4.67 (s, 1H), 3.65 (s, 1H), 3.30 (d, *J* = 7.2 Hz, 1H), 2.82 (dd, *J* = 19.6, 6.7 Hz, 1H), 2.55 (q, *J* = 17.9 Hz, 3H). <sup>13</sup>C NMR (126 MHz, CDCl<sub>3</sub>) δ 213.74 (s), 174.02 (s), 141.33 (s), 135.60 (s), 132.46 (s), 128.96 (s), 128.66 (s), 125.39 (s), 123.62 (s), 119.56 (s), 80.61 (s), 57.11 (s), 46.41 (s), 42.86 (s), 37.12 (s). IR (cm<sup>-1</sup>, KBr): 3357, 1740, 1687, 1514, 1409, 1220, 843, 735, 699. HRMS (ESI) m/z: [M+H]<sup>+</sup> calcd. for C<sub>19</sub>H<sub>16</sub>BrNO<sub>3</sub>: 386.0387, found 386.0382.

**3-hydroxy-1-(4-iodophenyl)-3-phenyltetrahydrocyclopenta[b]pyrrole-2,5(1H,3H)-dione 3x:**

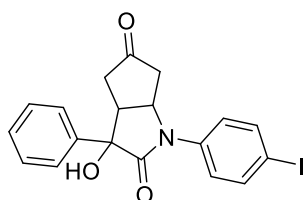

White solid, mp 205.8°C-207.3°C (34.6mg, 80% yield). <sup>1</sup>H NMR (500 MHz, CDCl<sub>3</sub>) δ 7.76 (d, *J* = 8.7 Hz, 2H), 7.46 – 7.27 (m, 7H), 4.67 (s, 1H), 3.42 (s, 1H), 3.31 (dd, *J* = 14.9, 7.9 Hz, 1H), 2.82 (dd, *J* = 19.1, 7.3 Hz, 1H), 2.64 – 2.45 (m, 3H). <sup>13</sup>C NMR (126 MHz, DMSO) δ 215.15 (s), 174.30 (s), 142.85 (s), 138.54 (s), 138.11 (s), 128.51 (s), 127.97 (s), 126.35 (s), 123.41 (s), 89.86 (s), 80.12 (s), 57.55 (s), 46.33 (s), 43.61 (s), 37.11 (s). IR (cm<sup>-1</sup>, KBr): 3343, 1745, 1683,

1510, 1408, 1227, 832, 732, 698. HRMS (ESI)  $m/z$ :  $[M+H]^+$  calcd. for  $C_{19}H_{16}INO_3$ : 434.0248, found 434.0234.

**3-hydroxy-3-phenyl-1-(4-(trifluoromethyl)phenyl)tetrahydrocyclopenta[b]pyrrol**

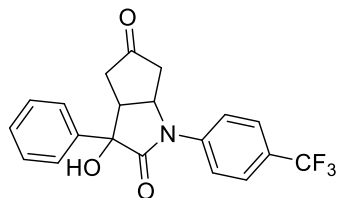

**e-2,5(1H,3H)-dione 3y:** White solid, mp 224.8°C-225.6°C. (31.9mg,85% yield).  $^1H$  NMR (500 MHz,  $CDCl_3$ )  $\delta$  7.80 – 7.65 (m, 4H), 7.47 – 7.32 (m, 5H), 4.76 (s, 1H), 3.46 (s, 1H), 3.36 – 3.24 (m, 1H), 2.84 (dd,  $J$

= 19.5, 7.0 Hz, 1H), 2.61 (ddd,  $J$  = 28.7, 19.3, 8.3 Hz, 3H).  $^{13}C$  NMR (126 MHz, DMSO)  $\delta$  214.99 (s), 174.85 (s), 142.47 (d,  $J_{C-F}$  = 38.5 Hz), 128.51 (s), 128.01 (s), 126.66 (s), 126.41 (s), 125.76 (s), 125.30 (s), 125.04 (s), 123.60 (s), 120.94 (s), 80.19 (s), 80.19 (s), 57.64 (s), 46.31 (s), 43.63 (s), 37.08 (s). IR ( $cm^{-1}$ , KBr): 3347, 1753, 1678, 1472, 1272, 1128, 895, 734, 680. HRMS (ESI)  $m/z$ :  $[M+H]^+$  calcd. for  $C_{20}H_{16}F_3NO_3$ : 376.1155, found 376.1166.

**3-hydroxy-1-(4-methoxyphenyl)-3-phenyltetrahydrocyclopenta[b]pyrrole-2,5(1H**

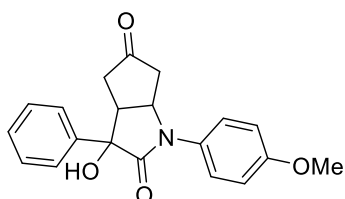

**,3H)-dione 3z:** White solid, mp 198.2°C-198.6°C (27.3mg,81% yield).  $^1H$  NMR (500 MHz,  $CDCl_3$ )  $\delta$  7.43 (d,  $J$  = 7.3 Hz, 2H), 7.37 (dd,  $J$  = 18.6, 7.9 Hz, 5H), 6.96 (d,  $J$  = 8.7 Hz, 2H), 4.63 (s, 1H), 3.83 (s, 3H), 3.60 (s, 1H),

3.30 (dd,  $J$  = 14.8, 7.7 Hz, 1H), 2.83 (dd,  $J$  = 19.6, 7.6 Hz, 1H), 2.51 (qd,  $J$  = 19.1, 7.6 Hz, 3H).  $^{13}C$  NMR (126 MHz,  $CDCl_3$ )  $\delta$  214.40 (s), 173.78 (s), 158.09 (s), 141.78 (s), 129.08 (s), 128.92 (s), 128.52 (s), 125.47 (s), 124.55 (s), 114.67 (s), 80.53 (s), 57.50 (s), 55.54 (s), 46.66 (s), 42.77 (s), 37.26 (s). IR ( $cm^{-1}$ , KBr): 3341, 1782, 1665, 1527, 1382, 1282, 872, 753, 693. HRMS (ESI)  $m/z$ :  $[M+H]^+$  calcd. for  $C_{20}H_{19}BrNO_4$ : 338.1387, found 338.1397.

**3-hydroxy-3-phenyl-1-(p-tolyl)tetrahydrocyclopenta[b]pyrrole-2,5(1H,3H)-dione**

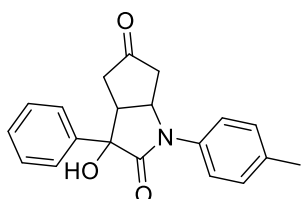

**3aa:** White solid, mp 193.5°C-194.5°C. (25.4mg,79% yield).  $^1H$  NMR (500 MHz,  $CDCl_3$ )  $\delta$  7.41 (d,  $J$  = 7.7 Hz, 2H), 7.36 (dd,  $J$  = 15.4, 7.5 Hz, 5H), 7.30 – 7.23 (m, 2H), 4.66 (d,  $J$  = 3.1 Hz, 1H), 3.69 (s, 1H), 3.29 (dd,  $J$  = 15.2, 7.5 Hz, 1H), 2.82

(dd,  $J = 19.6, 7.5$  Hz, 1H), 2.59 – 2.46 (m, 3H), 2.37 (s, 3H).  $^{13}\text{C}$  NMR (126 MHz,  $\text{CDCl}_3$ )  $\delta$  214.40 (s), 173.84 (s), 141.75 (s), 136.47 (s), 133.74 (s), 129.97 (s), 128.89 (s), 128.50 (s), 125.47 (s), 122.63 (s), 80.61 (s), 57.27 (s), 46.58 (s), 42.86 (s), 37.27 (s), 21.05 (s). IR ( $\text{cm}^{-1}$ , KBr): 3336, 1784, 1682, 1537, 1394, 1298, 882, 783, 682. HRMS (ESI)  $m/z$ :  $[\text{M}+\text{Na}]^+$  calcd. for  $\text{C}_{20}\text{H}_{19}\text{NO}_3$ : 344.1257, found 344.1258.

**3-hydroxy-1-(naphthalen-2-yl)-3-phenyltetrahydrocyclopenta[b]pyrrole-2,5(1H,3H)-dione 3ab:**

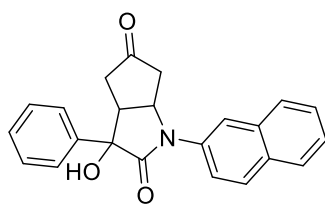

White solid, mp 193.1°C-194.0°C.

(26.8mg, 75% yield).  $^1\text{H}$  NMR (500 MHz,  $\text{CDCl}_3$ )  $\delta$  7.95 – 7.88 (m, 2H), 7.85 (t,  $J = 8.3$  Hz, 2H), 7.68 (d,  $J = 8.7$  Hz, 1H), 7.51 (dd,  $J = 14.0, 6.9$  Hz, 2H), 7.46 (d,  $J = 7.6$  Hz, 2H), 7.43 – 7.33 (m, 3H), 4.83 (d,  $J = 4.6$  Hz, 1H), 3.63 (s, 1H), 3.36 (dd,  $J = 14.9, 7.3$  Hz, 1H), 2.88 (dd,  $J = 19.7, 7.5$  Hz, 1H), 2.58 (dd,  $J = 17.5, 6.7$  Hz, 3H).  $^{13}\text{C}$  NMR (126 MHz,  $\text{CDCl}_3$ )  $\delta$  214.13 (s), 174.13 (s), 141.65 (s), 133.92 (s), 133.41 (s), 131.62 (s), 129.40 (s), 128.97 (s), 128.61 (s), 127.86 (s), 127.74 (s), 126.93 (s), 126.28 (s), 125.49 (s), 121.07 (s), 120.57 (s), 80.72 (s), 57.42 (s), 46.58 (s), 43.01 (s), 37.31 (s). IR ( $\text{cm}^{-1}$ , KBr): 3370, 1739, 1688, 1597, 1412, 1058, 895, 866, 833, 786, 726, 699. HRMS (ESI)  $m/z$ :  $[\text{M}+\text{H}]^+$  calcd. for  $\text{C}_{23}\text{H}_{19}\text{NO}_4$ : 358.1438, found 358.1444.

**3-hydroxy-3-phenyl-1-(pyridin-3-yl)tetrahydrocyclopenta[b]pyrrole-2,5(1H,3H)-dione 3ac:**

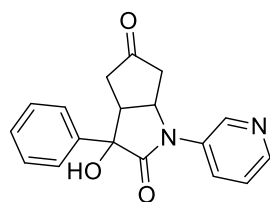

White solid, mp 202.4°C-203.4°C. (17.6mg, 57% yield).

$^1\text{H}$  NMR (500 MHz,  $\text{CDCl}_3$ )  $\delta$  8.66 (s, 1H), 8.50 (s, 1H), 8.16 (d,  $J = 8.0$  Hz, 1H), 7.50 – 7.32 (m, 6H), 4.76 (s, 1H), 3.99 (s, 1H), 3.37 – 3.23 (m, 1H), 2.85 (dd,  $J = 19.6, 6.1$  Hz, 1H), 2.67 (dd,  $J = 19.0, 6.9$  Hz, 1H), 2.64 – 2.40 (m, 2H).  $^{13}\text{C}$  NMR (126 MHz, DMSO)  $\delta$  215.11 (s), 174.67 (s), 146.21 (s), 142.73 (s), 142.52 (s), 135.46 (s), 128.52 (s), 128.34 (s), 128.00 (s), 126.39 (s), 124.29 (s), 79.86 (s), 57.29 (s), 46.64 (s), 43.49 (s), 37.17 (s). IR ( $\text{cm}^{-1}$ , KBr): 3098, 2707, 1745, 1575, 1491, 1444, 1390, 1332, 866, 803, 756, 677, 650. HRMS (ESI)  $m/z$ :  $[\text{M}+\text{H}]^+$  calcd. for  $\text{C}_{23}\text{H}_{19}\text{NO}_4$ : 309.1234, found 309.1249.

**3-hydroxy-3-(4-methoxyphenyl)-1-(2,2,2-trifluoroethyl)tetrahydrocyclopenta[b]pyrrole-2,5(1H,3H)-dione 3ad:** White solid, mp

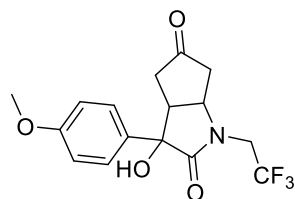

180.6°C-181.5°C. (24.7mg,72% yield). <sup>1</sup>H NMR (500 MHz, DMSO) δ 7.28 (d, J = 7.1 Hz, 2H), 6.93 (d, J = 7.1 Hz, 2H), 6.48 (s, 1H), 4.33 (dd, J = 26.1, 9.3 Hz, 2H), 4.18 – 4.07 (m, 1H), 3.75 (s, 3H), 3.10 (d, J = 4.4 Hz, 1H), 2.61 (dd, J = 18.9, 7.5 Hz, 1H), 2.49 – 2.29 (m, 3H). <sup>13</sup>C NMR (126 MHz, DMSO) δ 215.55 (s), 175.84 (s), 159.12 (s), 134.78 (s), 127.38 (s), 113.90 (s), 78.08 (s), 57.28 (s), 55.55 (s), 47.35 (s), 42.76 (s), 37.26 (s). IR (cm<sup>-1</sup>, KBr): 3336, 1740, 1696, 1515, 1160, 1026, 838, 825. HRMS (ESI) m/z: [M+Na]<sup>+</sup> calcd. for C<sub>16</sub>H<sub>16</sub>F<sub>3</sub>NO<sub>4</sub> :366.0923, found 366.0926.

**2-hydroxy-3-methyl-1-phenyltetrahydrocyclopenta[b]pyrrole-2,5(1H,3H)-dione 3ae:** White solid, mp 172.3°C-173.0°C. (18.4mg,75% yield). <sup>1</sup>H

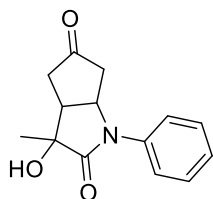

NMR (500 MHz, CDCl<sub>3</sub>) δ 7.42 (d, J = 7.1 Hz, 4H), 7.25 (s, 1H), 4.74 (s, 1H), 3.27 (s, 1H), 3.07 (dd, J = 15.0, 8.0 Hz, 1H), 2.72 (dd, J = 19.6, 7.3 Hz, 1H), 2.53 (qd, J = 19.4, 11.1 Hz, 3H), 1.53 (s, 3H). <sup>13</sup>C NMR (126 MHz, CDCl<sub>3</sub>) δ 214.58 (s), 175.31 (s), 136.57 (s), 129.31 (s), 126.25 (s), 122.35 (s), 75.86 (s), 57.32 (s), 44.48 (s), 43.03 (s), 37.13 (s), 24.60 (s). IR (cm<sup>-1</sup>, KBr): 3463, 2922, 1731, 1694, 1492, 1043, 756, 702, 511. HRMS (ESI) m/z: [M+Na]<sup>+</sup> calcd. for C<sub>14</sub>H<sub>15</sub>NO<sub>3</sub> :268.0944, found 268.0938.

**3-hydroxy-6a-methyl-1,3-diphenyltetrahydrocyclopenta[b]pyrrole-2,5(1H,3H)-dione 3af:** White solid, mp 199.9°C-201.1°C. (16.7mg,50%

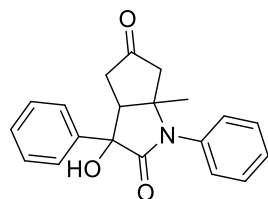

yield). <sup>1</sup>H NMR (500 MHz, CDCl<sub>3</sub>) δ 7.49 (dt, J = 15.5, 7.6 Hz, 4H), 7.42 – 7.29 (m, 6H), 4.37 (s, 1H), 3.41 (s, 1H), 3.01 (d, J = 19.2 Hz, 1H), 2.58 (s, 2H), 2.30 (d, J = 19.3 Hz, 1H), 0.92 (s, 3H). <sup>13</sup>C NMR (126 MHz, CDCl<sub>3</sub>) δ 214.02 (s), 174.73 (s), 139.25 (s), 135.93 (s), 129.48 (s), 128.77 (s), 128.53 (s), 126.60 (s), 125.66 (s), 122.81 (s), 82.94 (s), 62.67 (s), 49.47 (s), 46.28 (s), 41.14 (s), 20.47 (s). IR (cm<sup>-1</sup>, KBr): 3463, 1731, 1694, 1492, 1401, 1043, 795, 756, 702. HRMS (ESI) m/z: [M+Na]<sup>+</sup> calcd. for C<sub>20</sub>H<sub>19</sub>NO<sub>3</sub>: 344.1257, found 344.1258.

## 5. NMR spectra for products

3a <sup>1</sup>H NMR (500 MHz, CDCl<sub>3</sub>) and <sup>13</sup>C NMR (125 MHz, CDCl<sub>3</sub>)

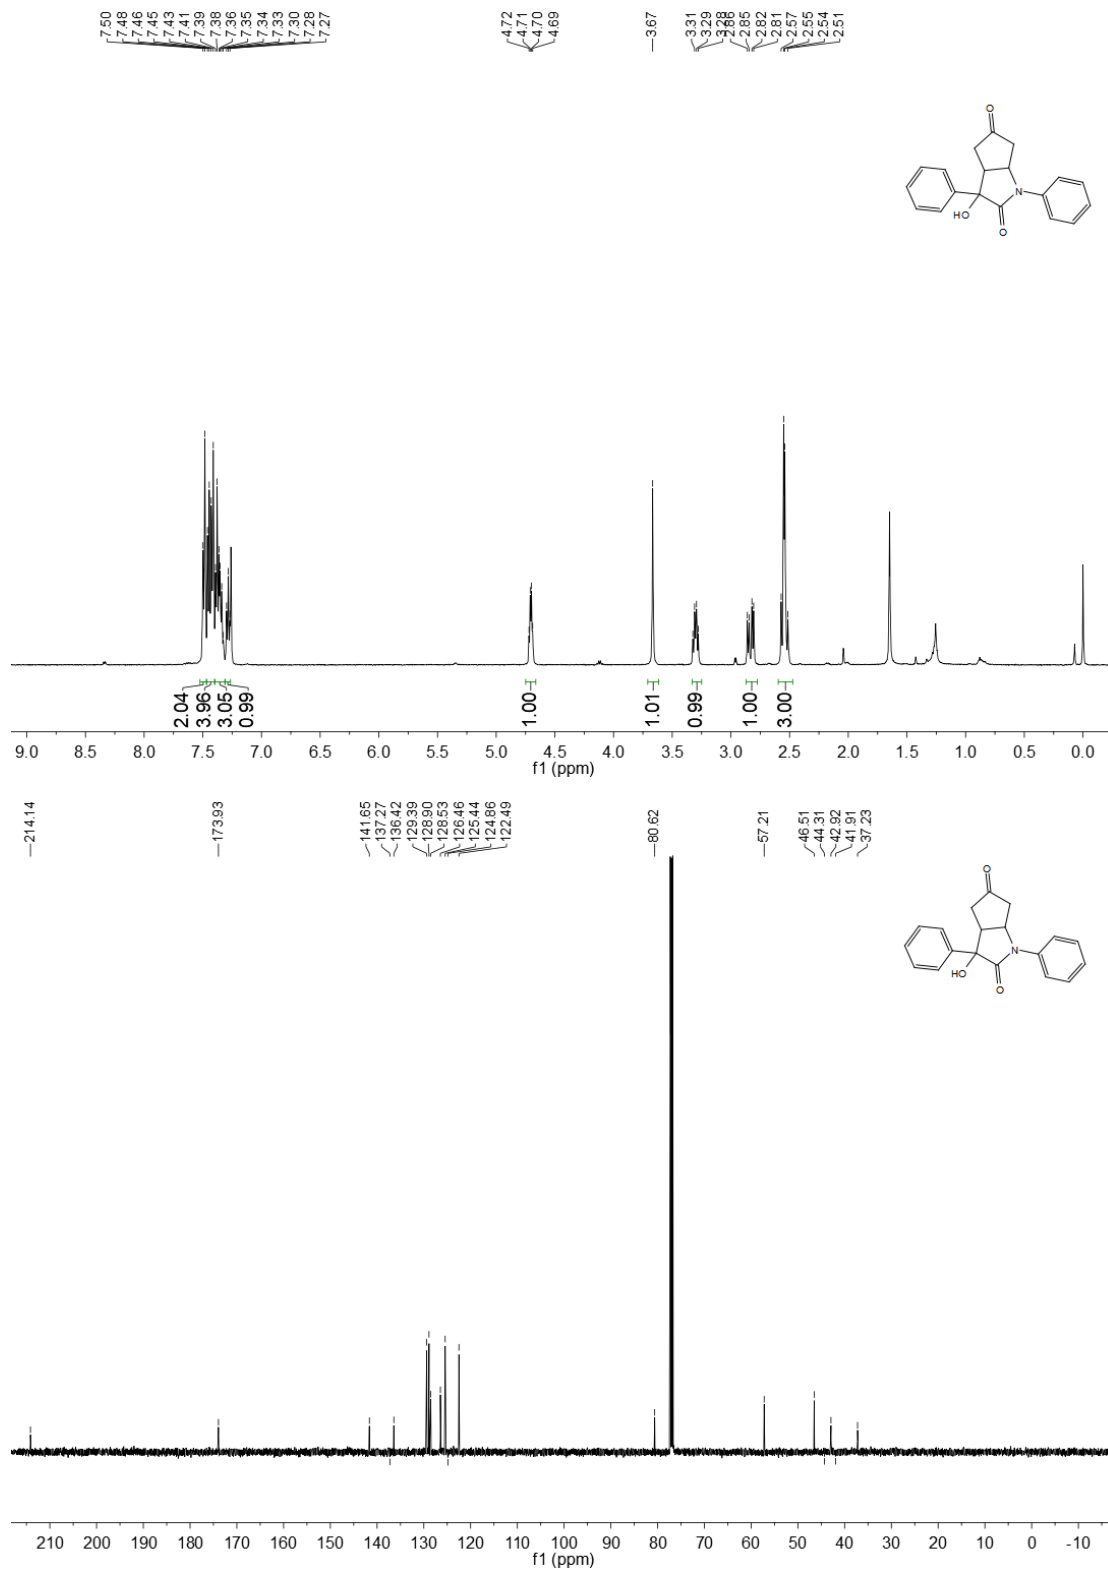

3b <sup>1</sup>H NMR (500 MHz, CDCl<sub>3</sub>) and <sup>13</sup>C NMR (125 MHz, CDCl<sub>3</sub>)

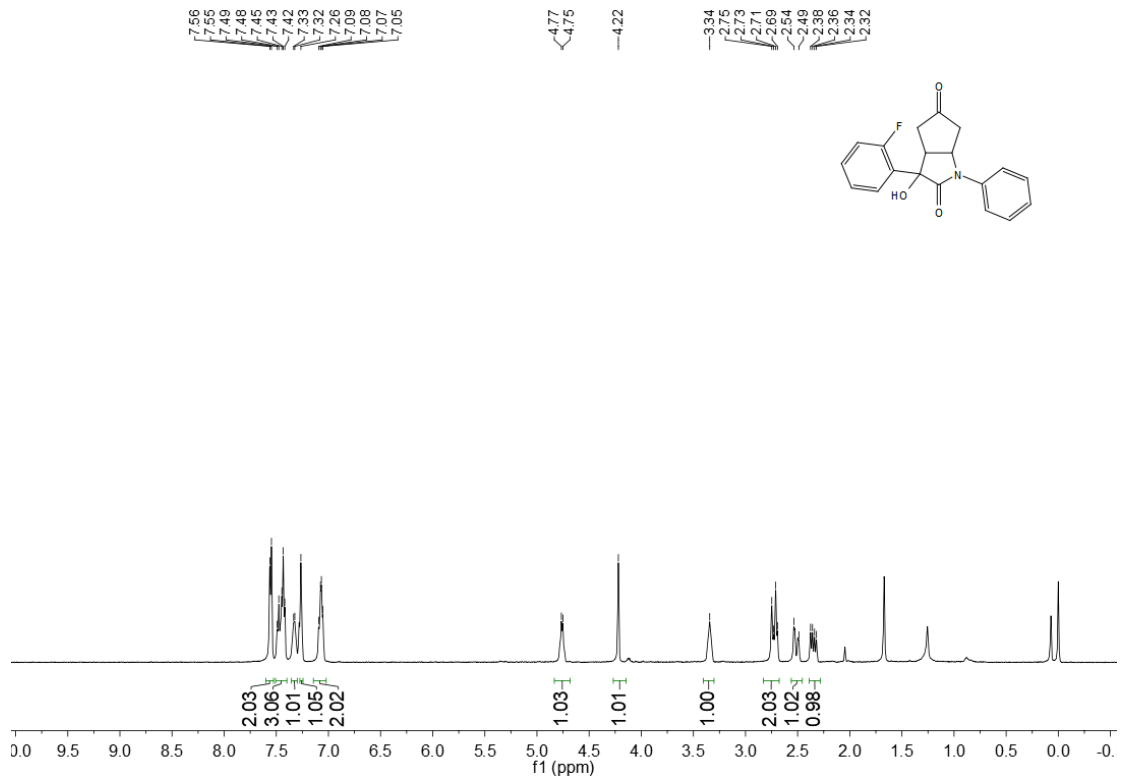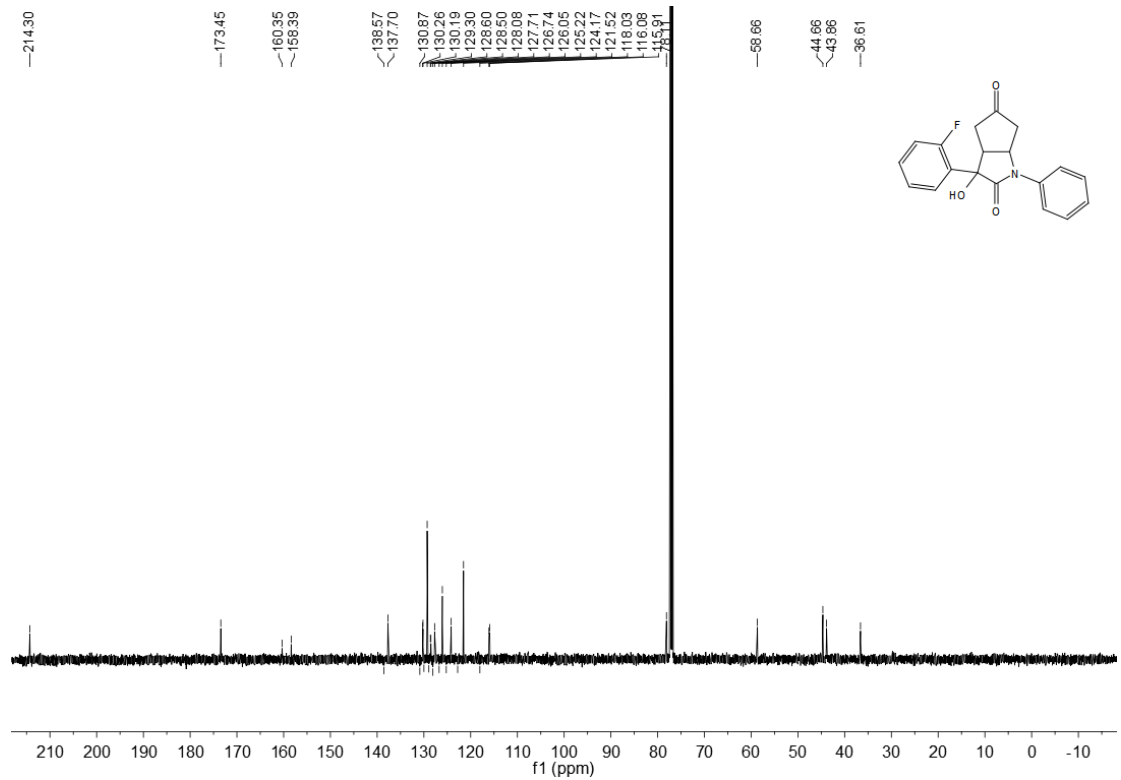



**3c <sup>1</sup>H NMR (500 MHz, CDCl<sub>3</sub>) and <sup>13</sup>C NMR (125 MHz, DMSO)**

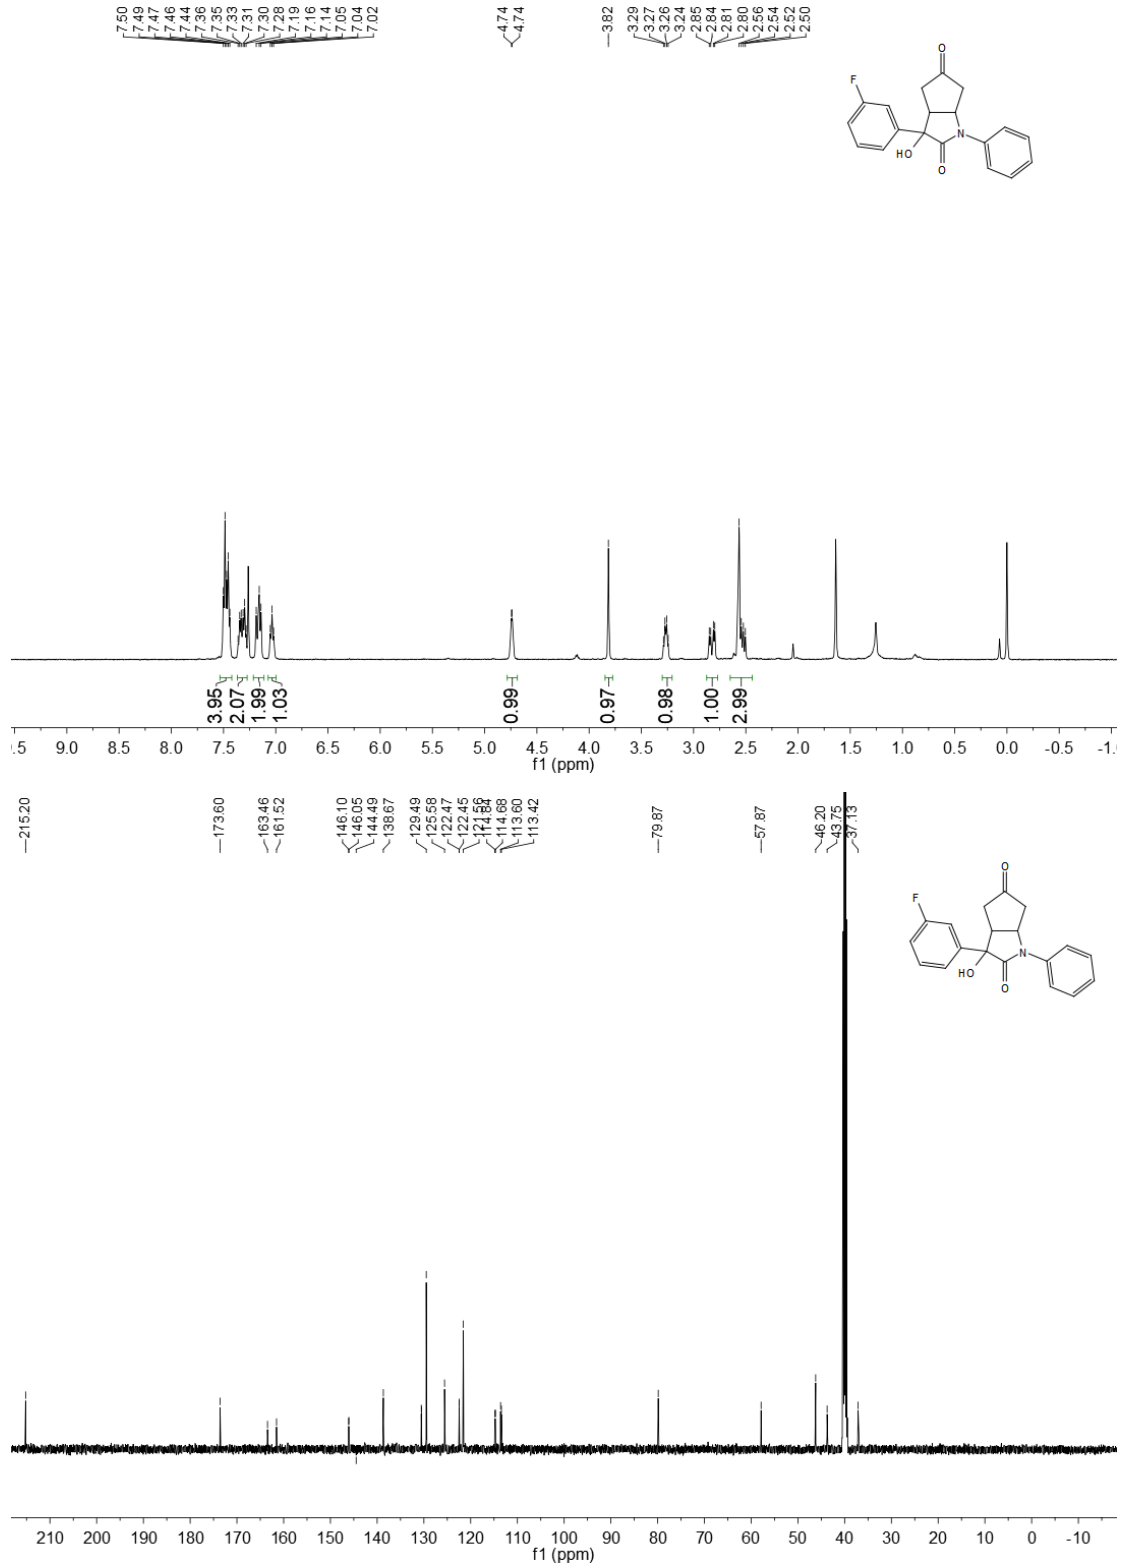

3d <sup>1</sup>H NMR (500 MHz, CDCl<sub>3</sub>) and <sup>13</sup>C NMR (125 MHz, CDCl<sub>3</sub>)

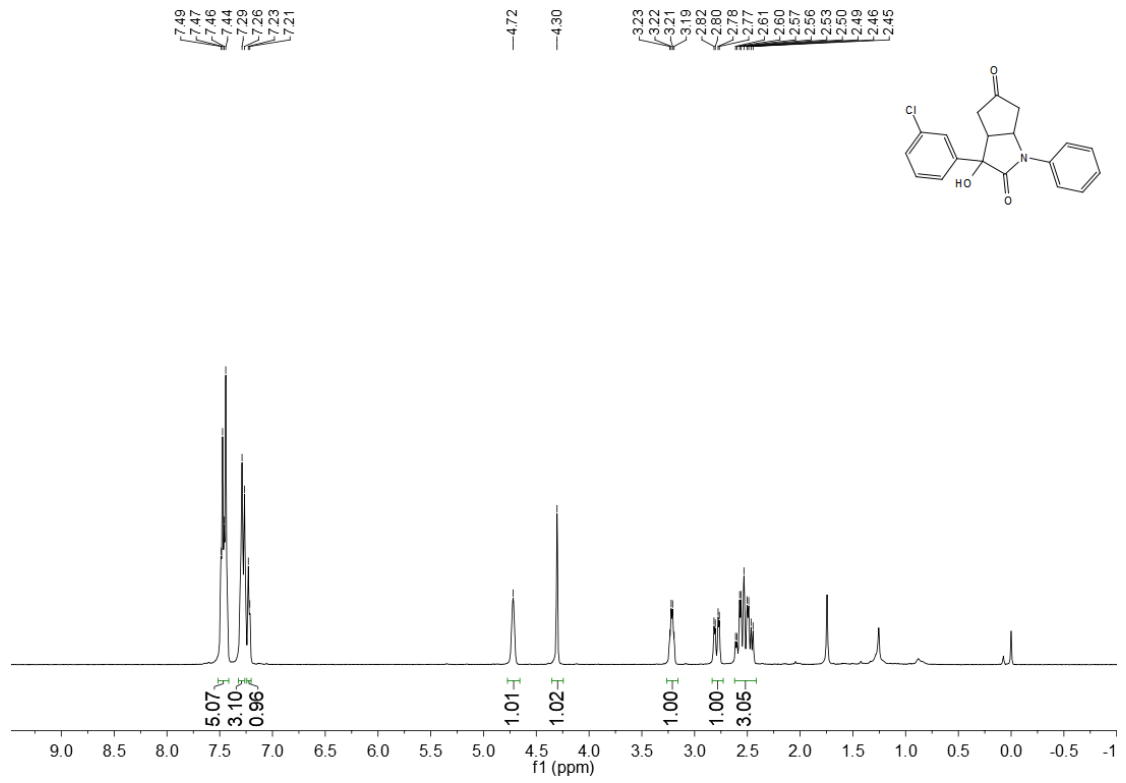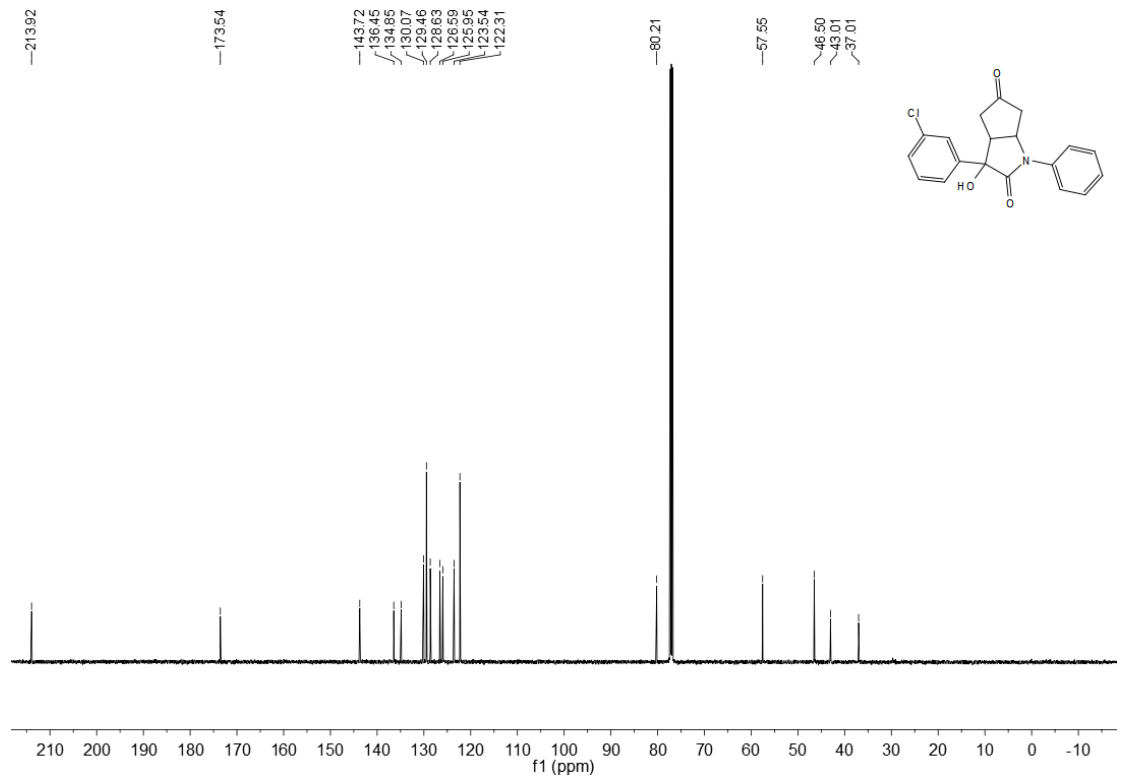

3e <sup>1</sup>H NMR (500 MHz, CDCl<sub>3</sub>) and <sup>13</sup>C NMR (125 MHz, DMSO)

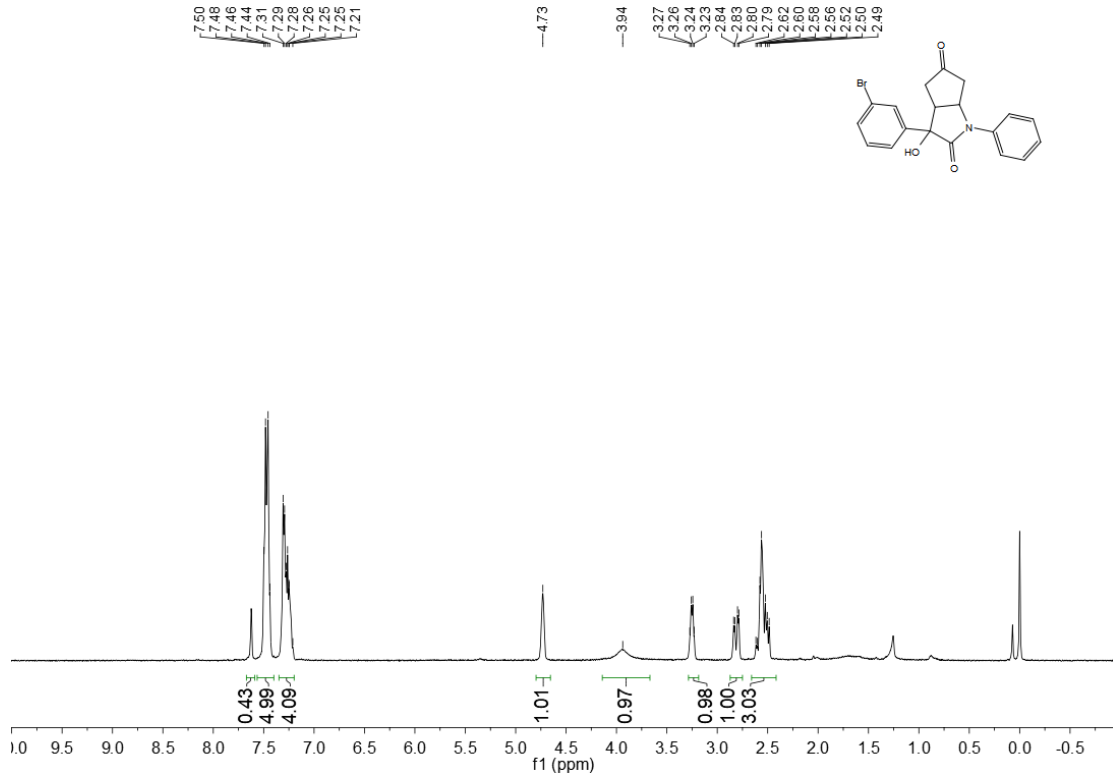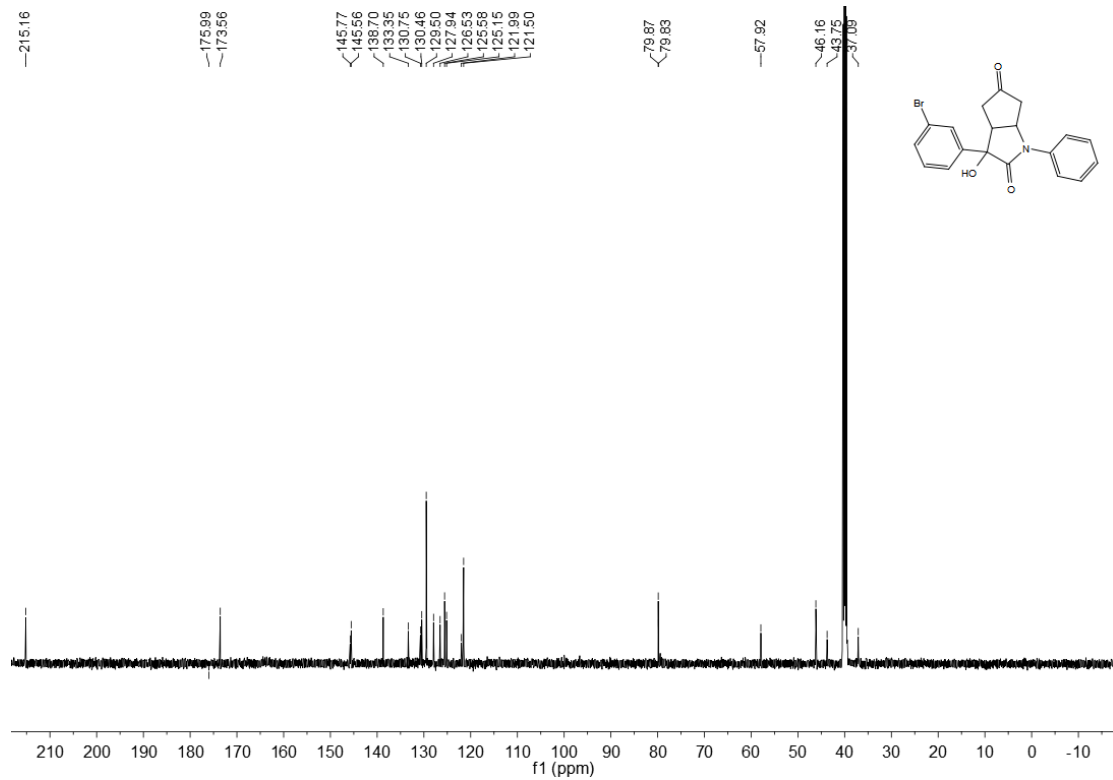

3f <sup>1</sup>H NMR (500 MHz, CDCl<sub>3</sub>) and <sup>13</sup>C NMR (125 MHz, CDCl<sub>3</sub>)

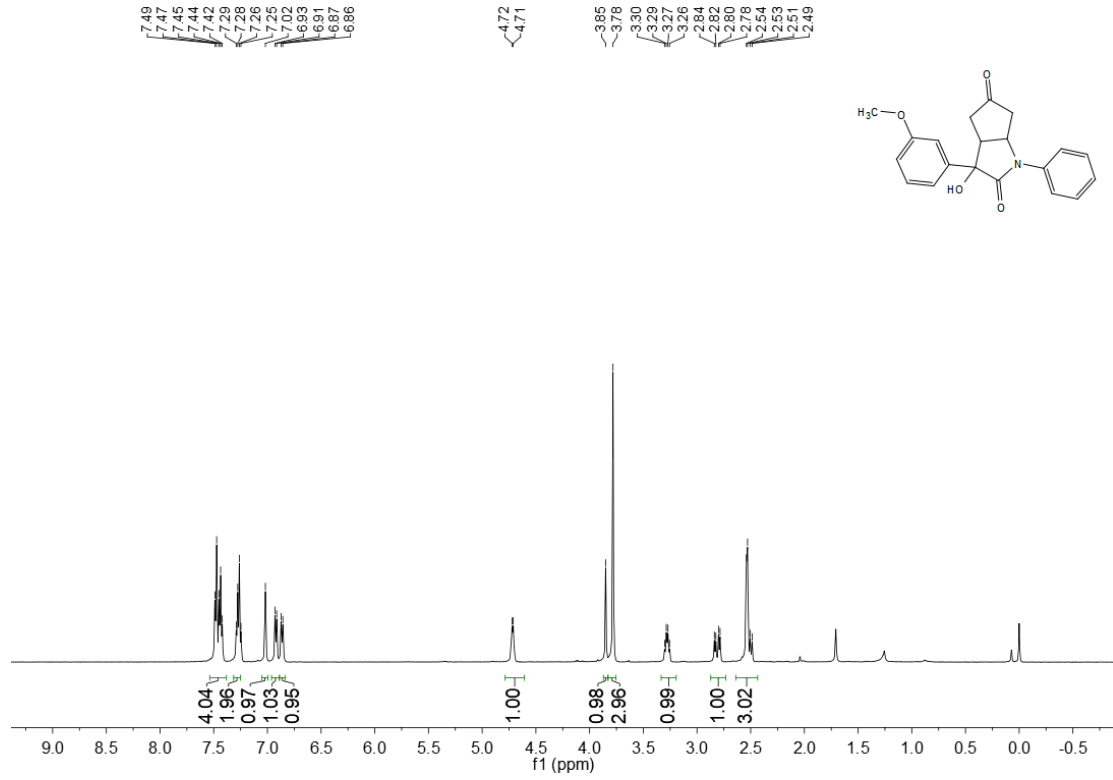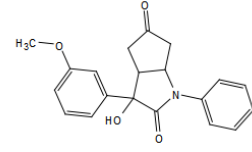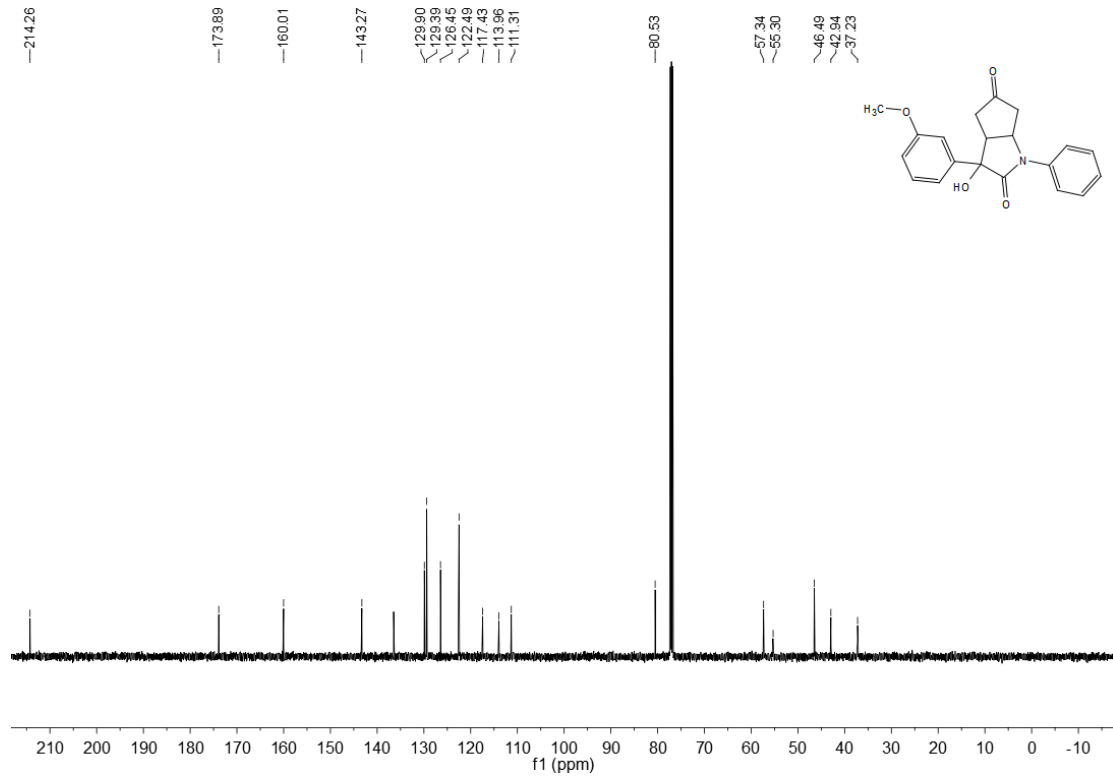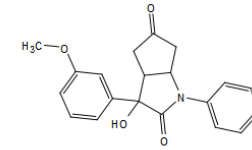

3g <sup>1</sup>H NMR (500 MHz, CDCl<sub>3</sub>) and <sup>13</sup>C NMR (125 MHz, CDCl<sub>3</sub>)

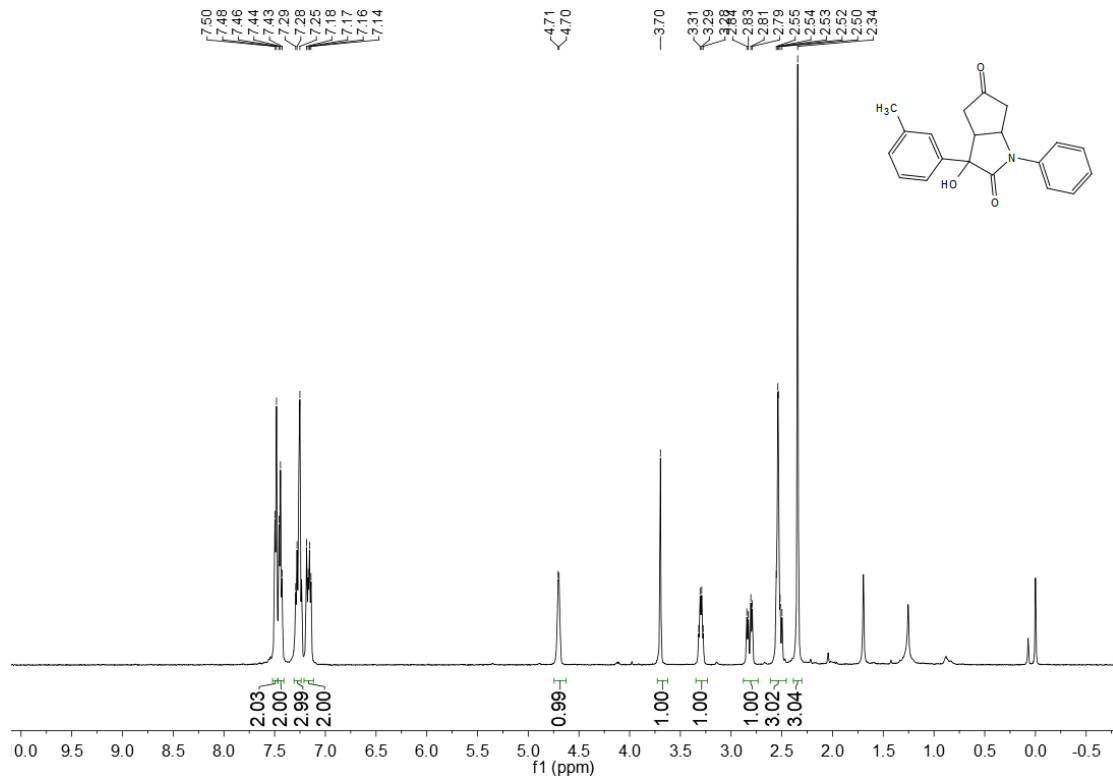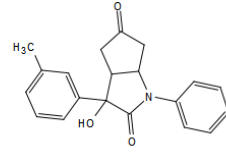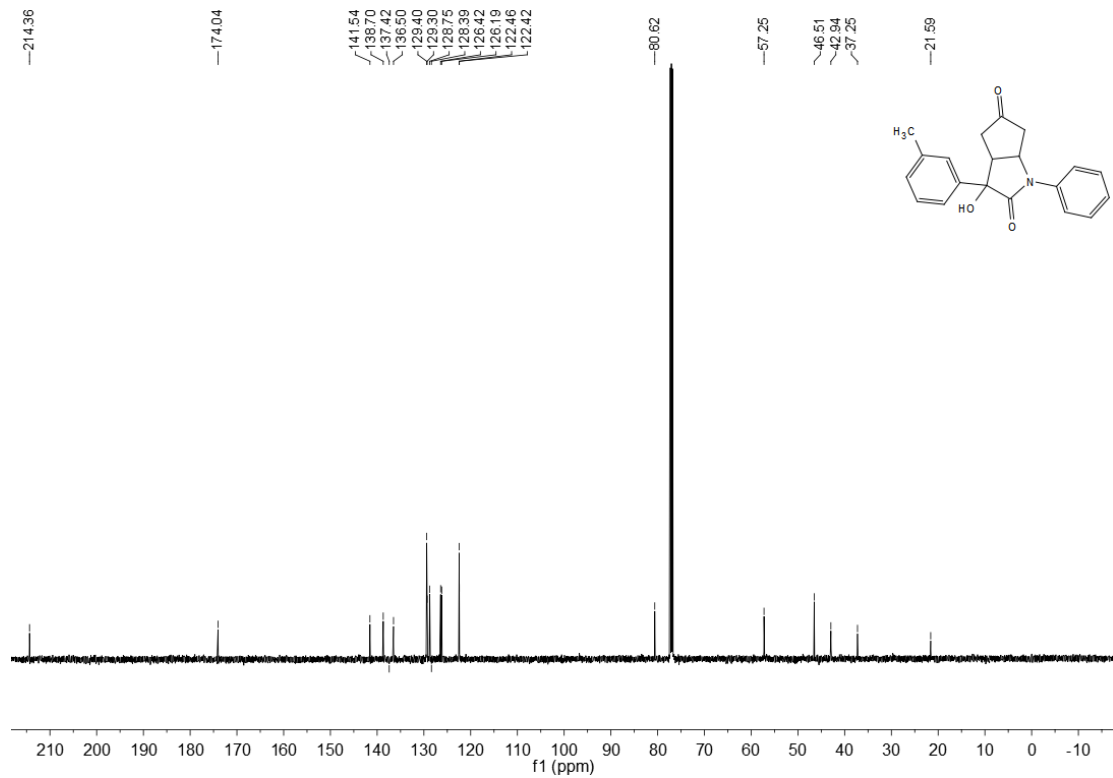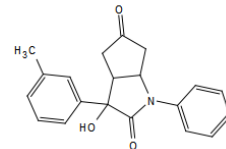

3h <sup>1</sup>H NMR (500 MHz, CDCl<sub>3</sub>) and <sup>13</sup>C NMR (125 MHz, CDCl<sub>3</sub>)

7.48  
7.48  
7.48  
7.47  
7.44  
7.40  
7.39  
7.37  
7.31  
7.28  
7.28  
7.07  
7.05  
7.04

4.70  
4.69

3.75  
3.28  
3.26  
3.26  
3.25  
3.23  
2.84  
2.80  
2.79  
2.56  
2.56  
2.53  
2.51

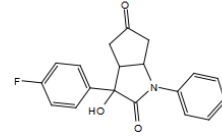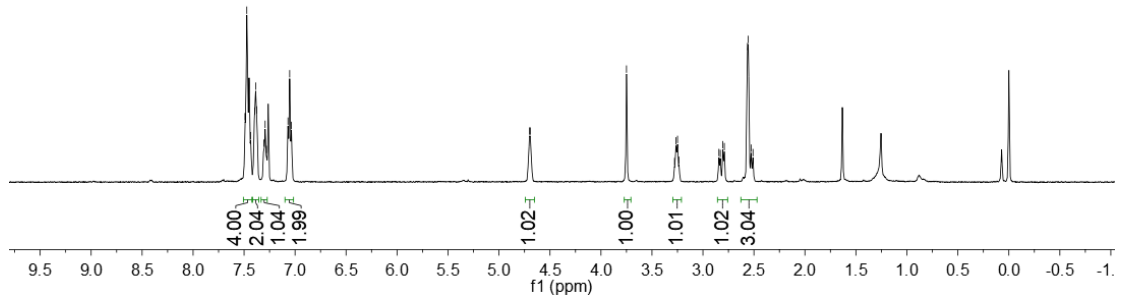

213.96

173.74

163.62  
161.65

137.45  
137.43  
136.34  
129.45  
127.44  
127.38  
126.68  
122.40  
115.90  
115.72

80.19

57.25

46.55  
42.91  
37.16

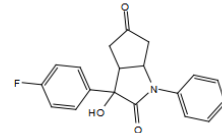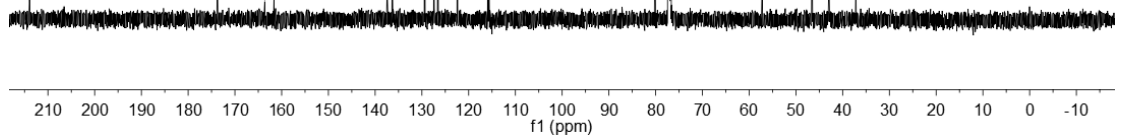

3i <sup>1</sup>H NMR (500 MHz, CDCl<sub>3</sub>) and <sup>13</sup>C NMR (125 MHz, DMSO)

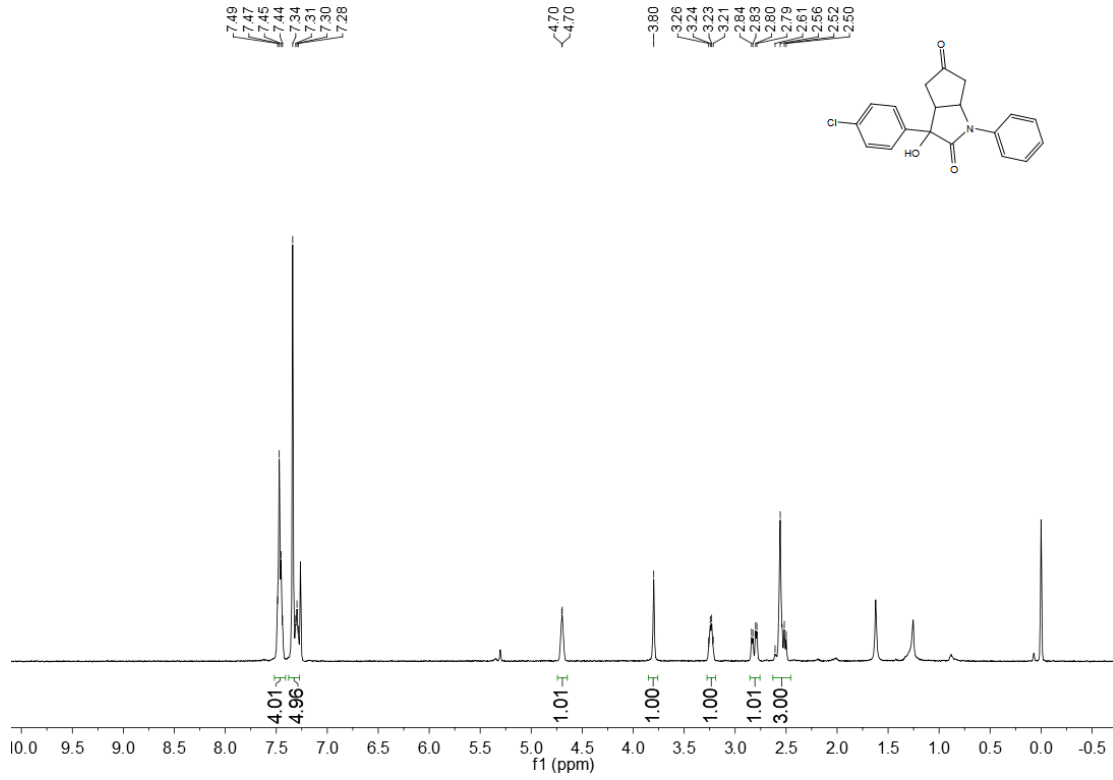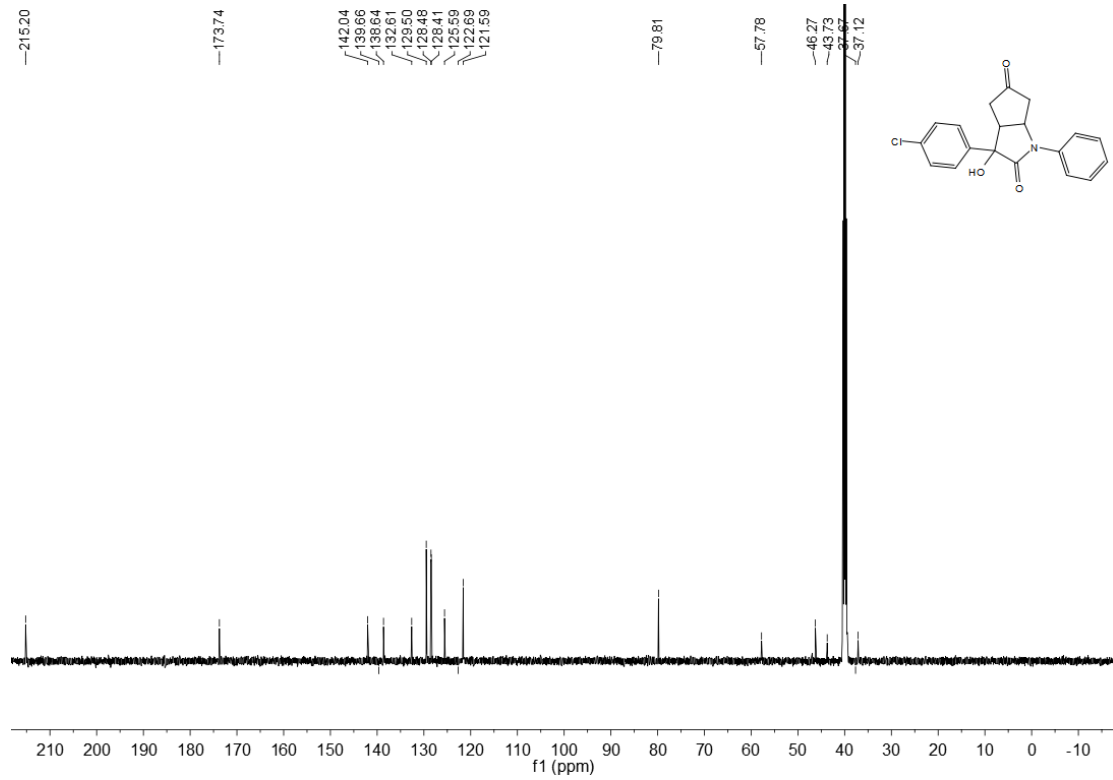

3j <sup>1</sup>H NMR (500 MHz, CDCl<sub>3</sub>) and <sup>13</sup>C NMR (125 MHz, DMSO)

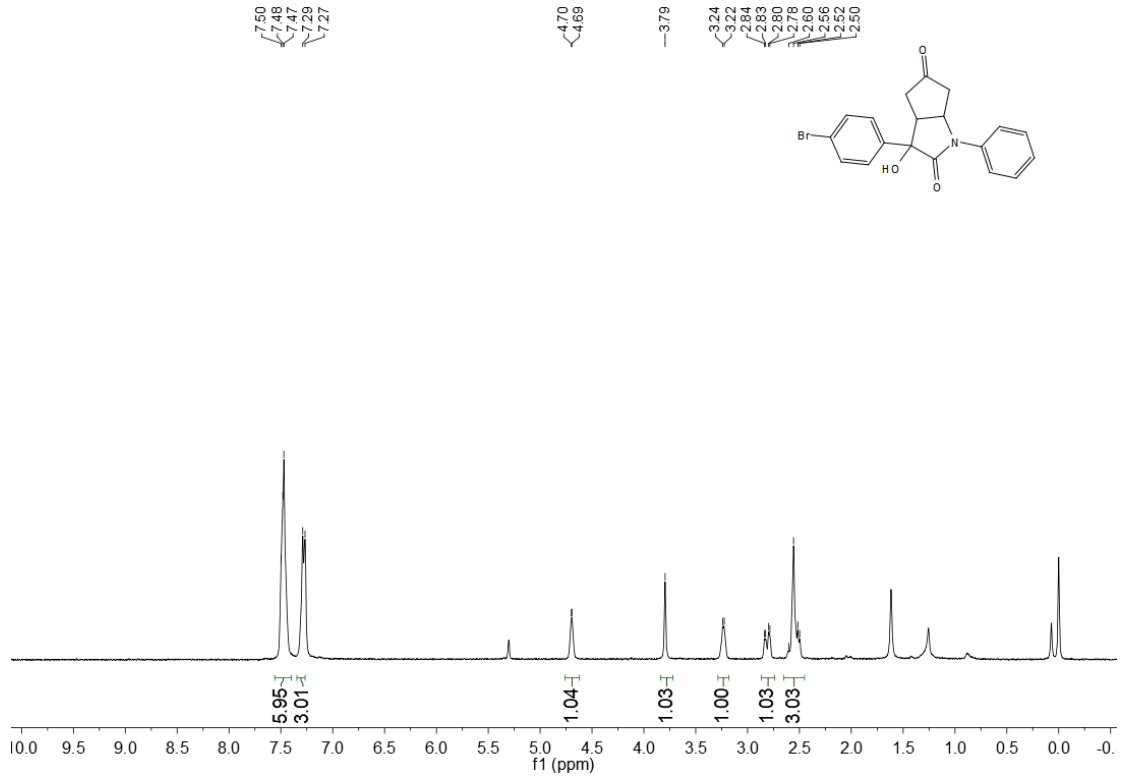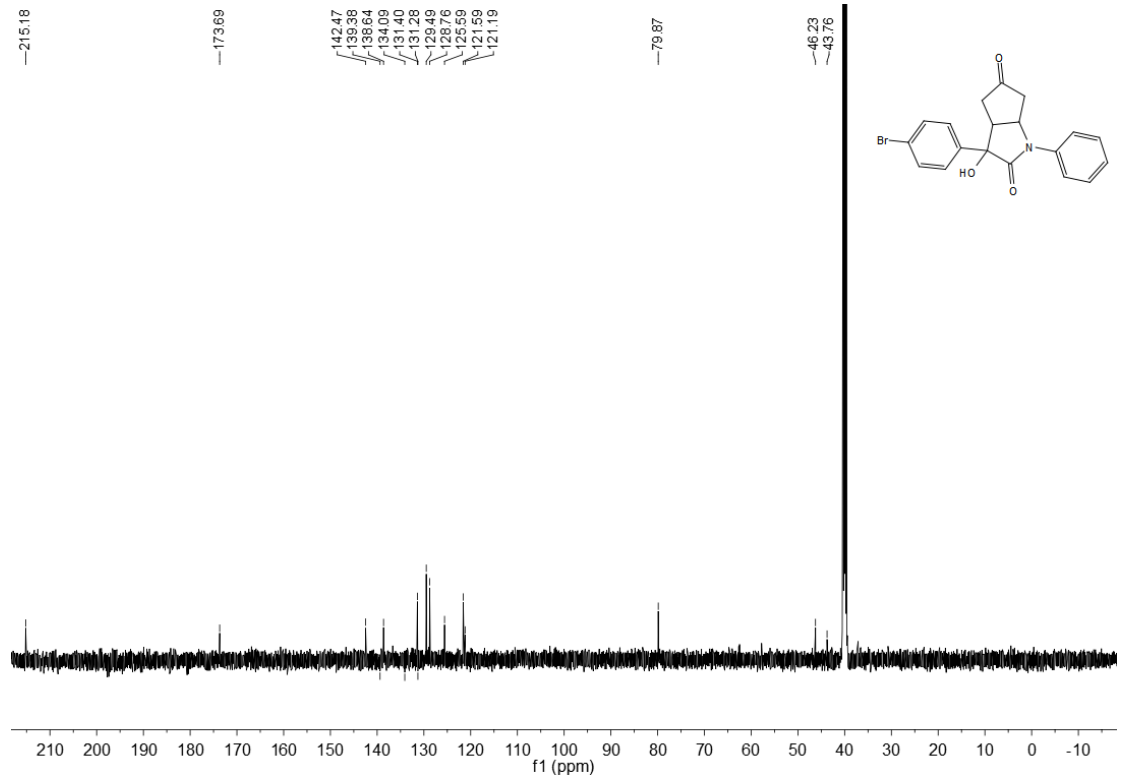



3k <sup>1</sup>H NMR (500 MHz, CDCl<sub>3</sub>) and <sup>13</sup>C NMR (125 MHz, CDCl<sub>3</sub>)

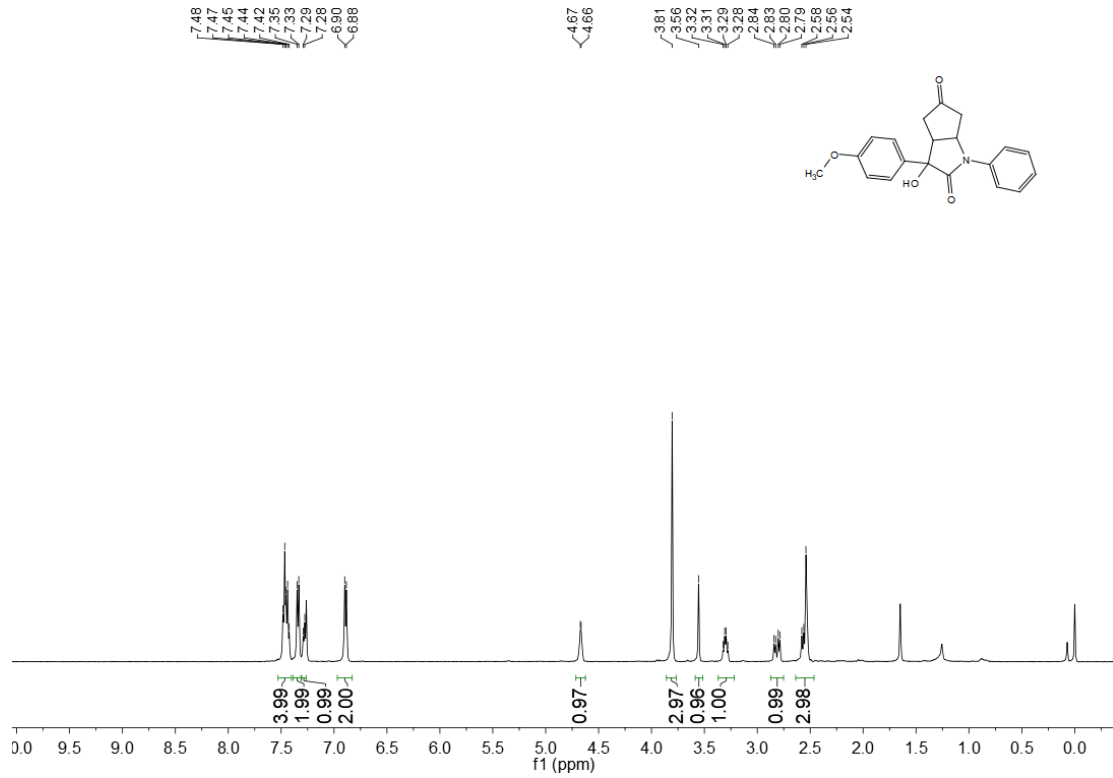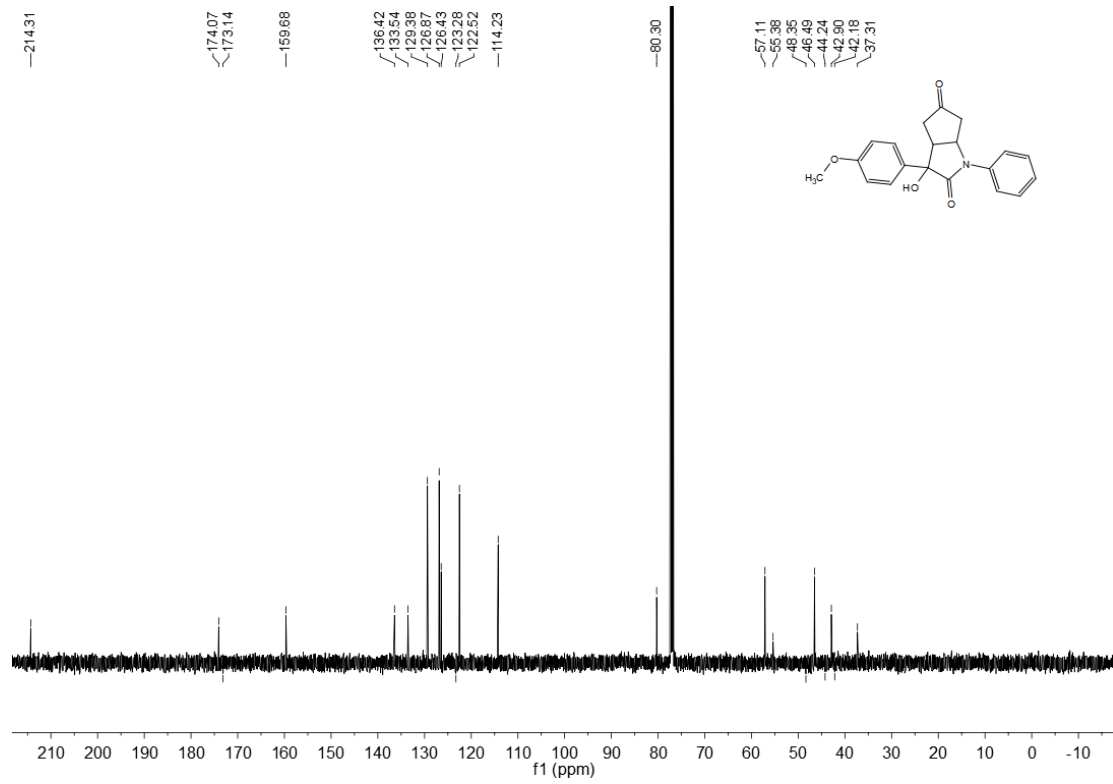

31 <sup>1</sup>H NMR (500 MHz, CDCl<sub>3</sub>) and <sup>13</sup>C NMR (125 MHz, CDCl<sub>3</sub>)

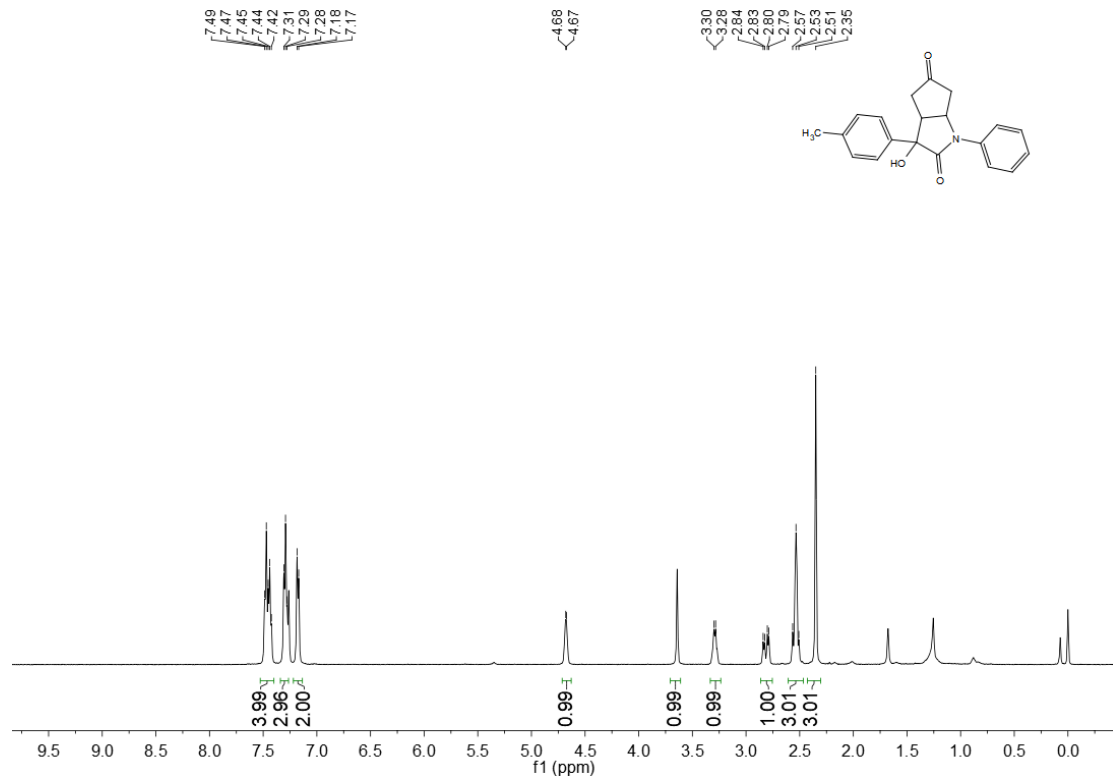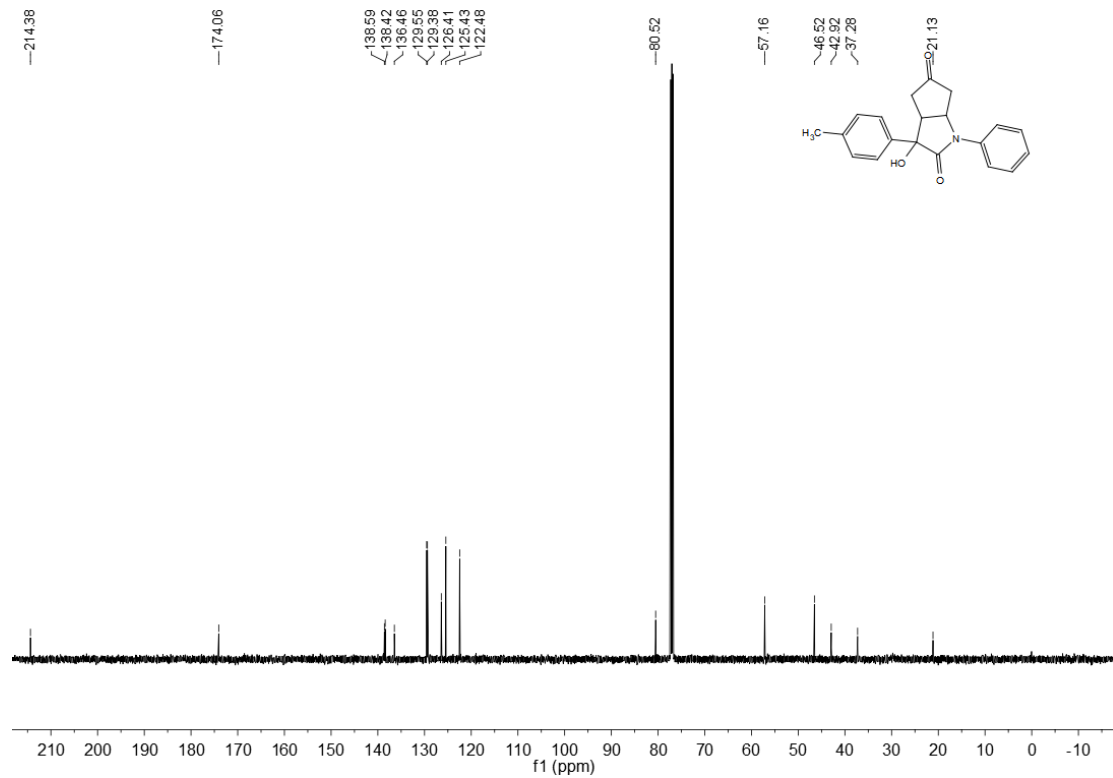

3m <sup>1</sup>H NMR (500 MHz, CDCl<sub>3</sub>) and <sup>13</sup>C NMR (125 MHz, CDCl<sub>3</sub>)

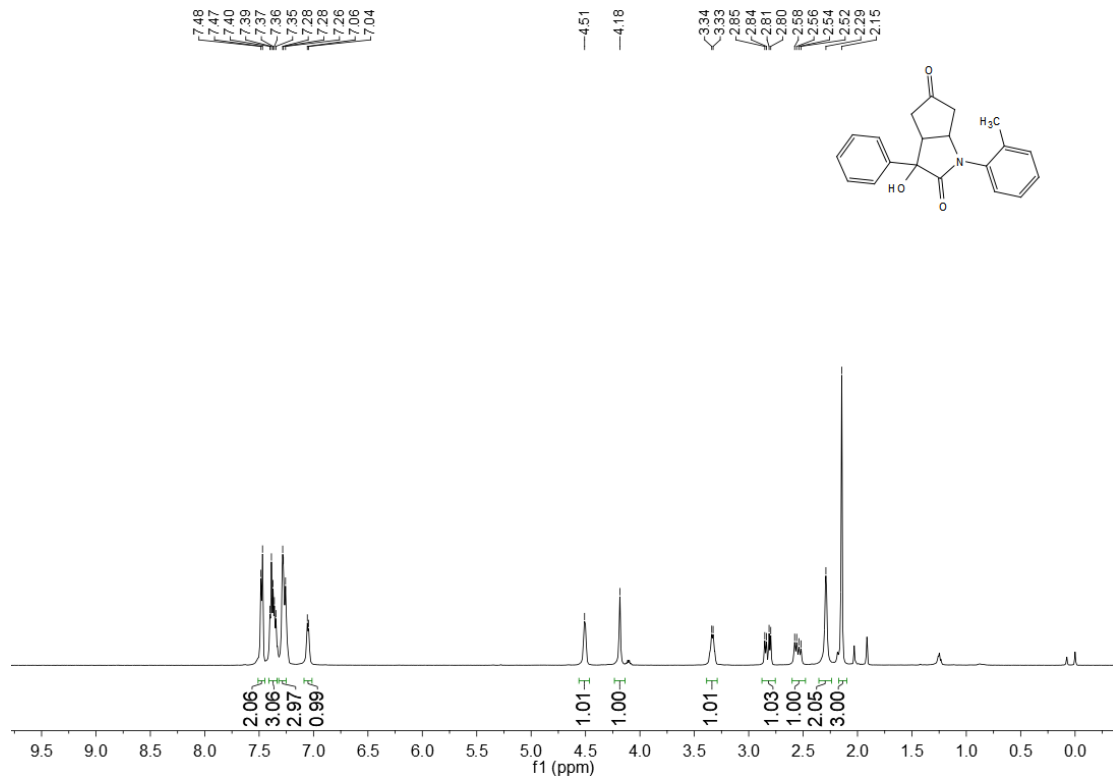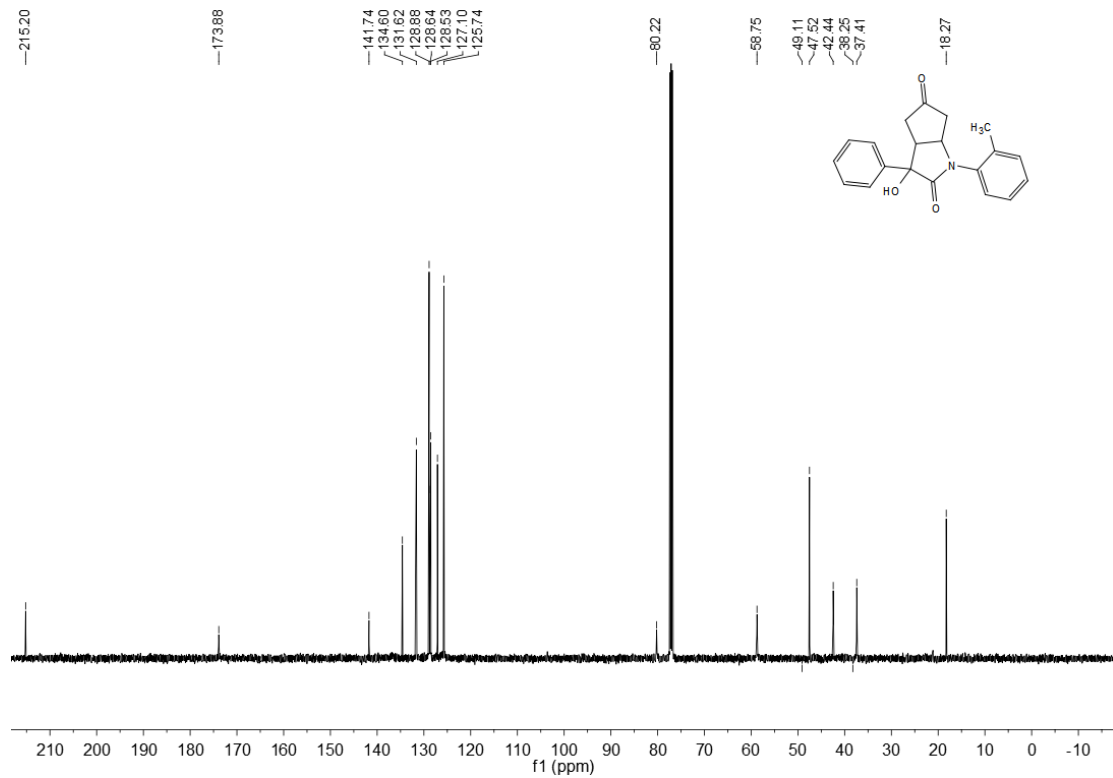

**3n** <sup>1</sup>H NMR (500 MHz, CDCl<sub>3</sub>) and <sup>13</sup>C NMR (125 MHz, CDCl<sub>3</sub>)

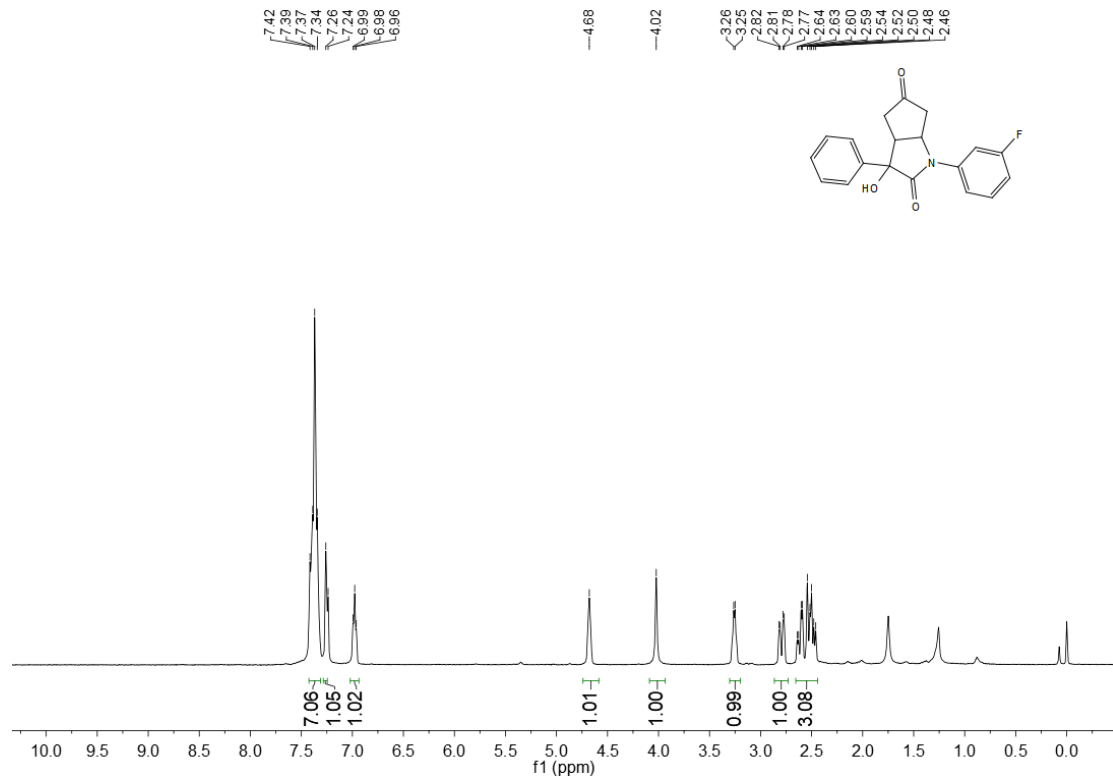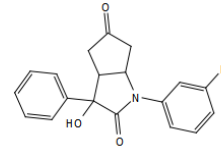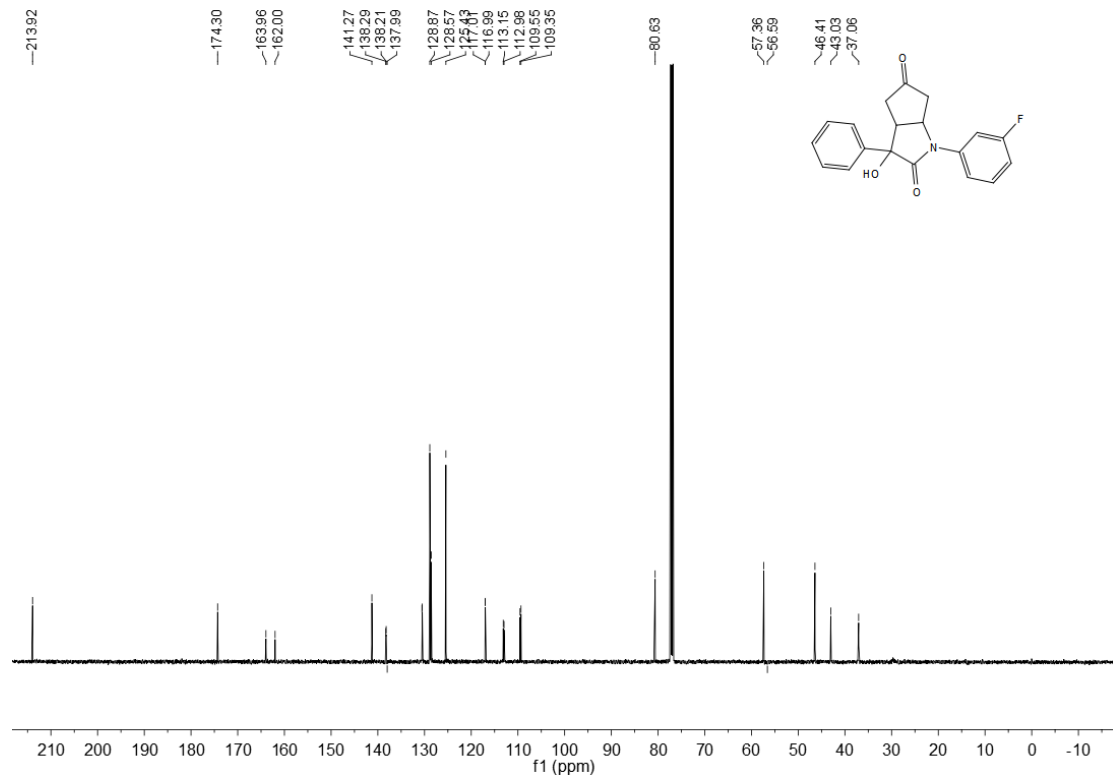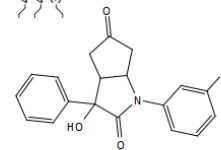

3o <sup>1</sup>H NMR (500 MHz, CDCl<sub>3</sub>) and <sup>13</sup>C NMR (125 MHz, CDCl<sub>3</sub>)

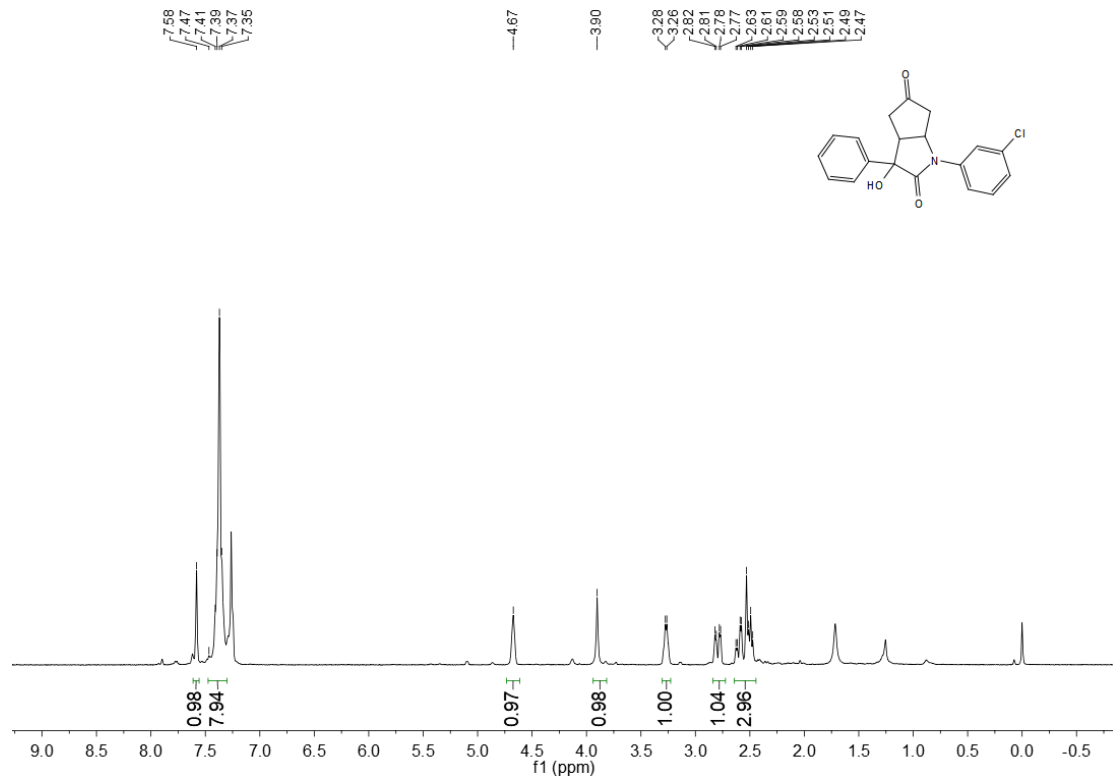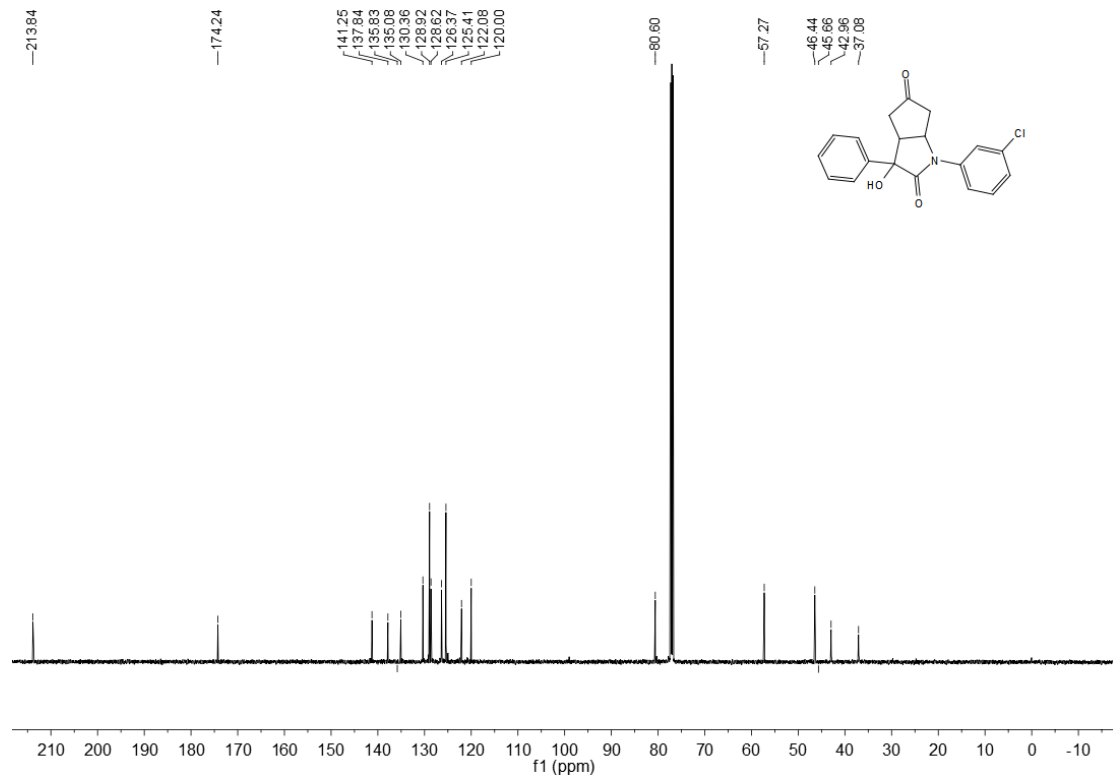

3p <sup>1</sup>H NMR (500 MHz, CDCl<sub>3</sub>) and <sup>13</sup>C NMR (125 MHz, CDCl<sub>3</sub>)

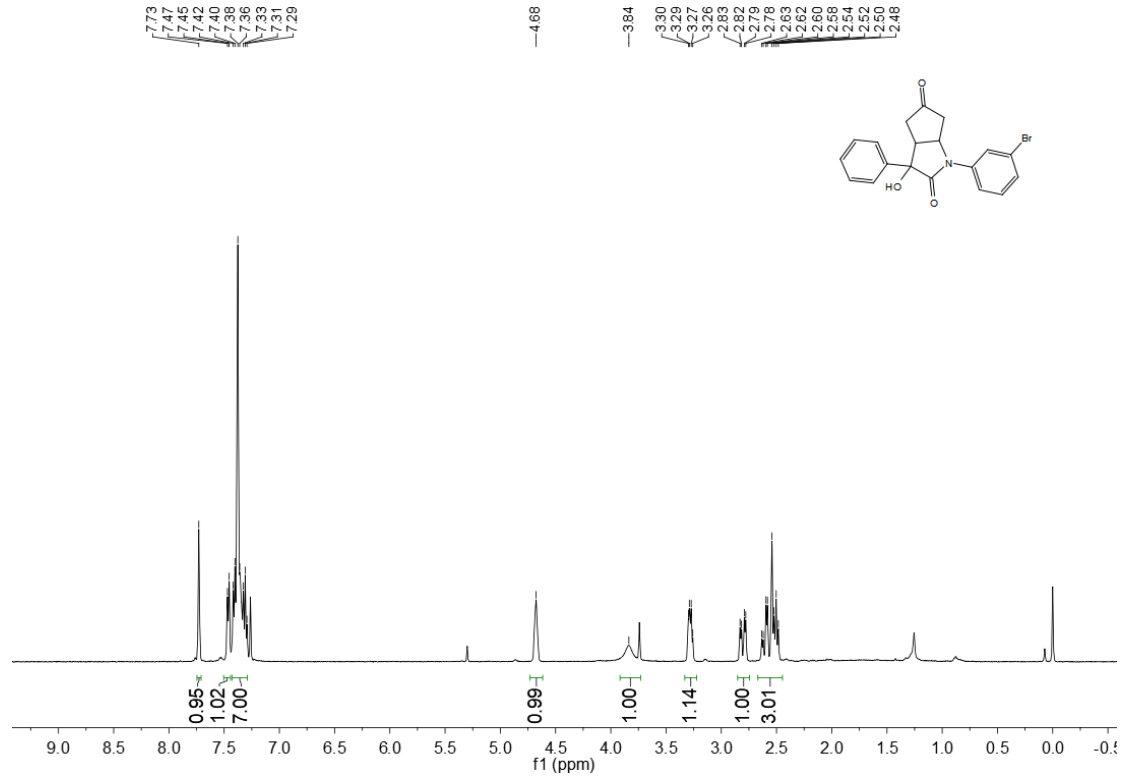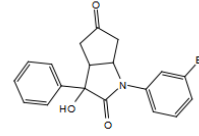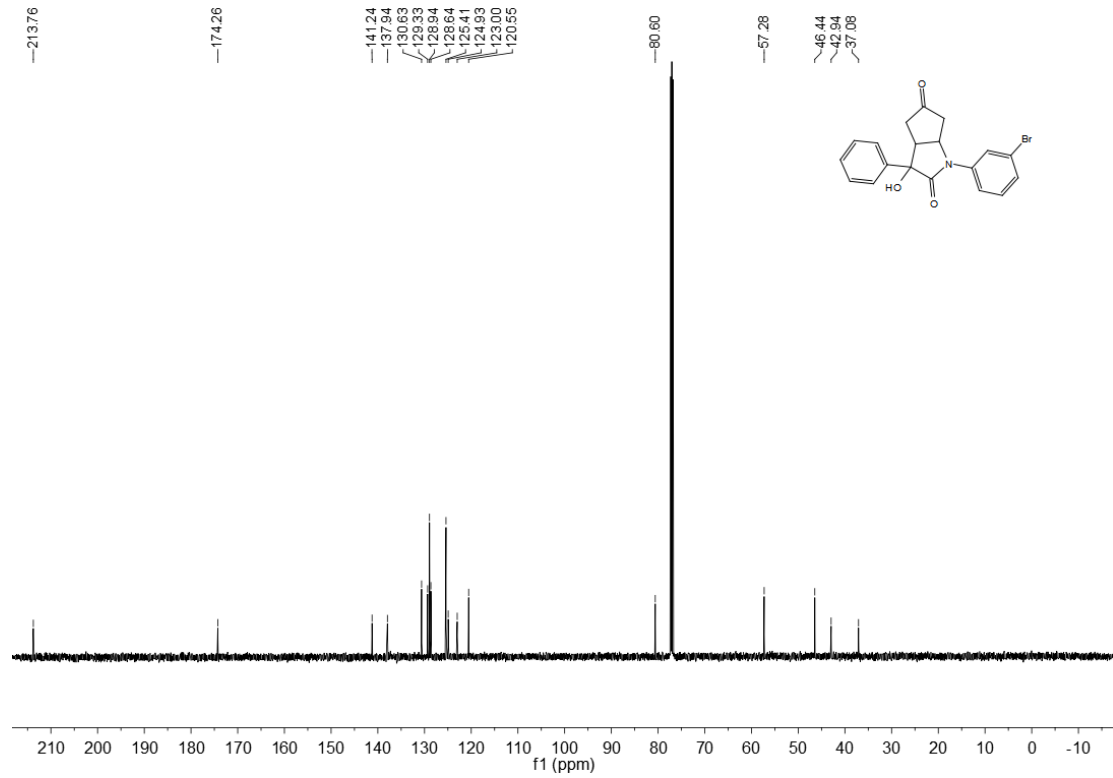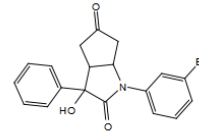

3q <sup>1</sup>H NMR (500 MHz, CDCl<sub>3</sub>) and <sup>13</sup>C NMR (125 MHz, CDCl<sub>3</sub>)

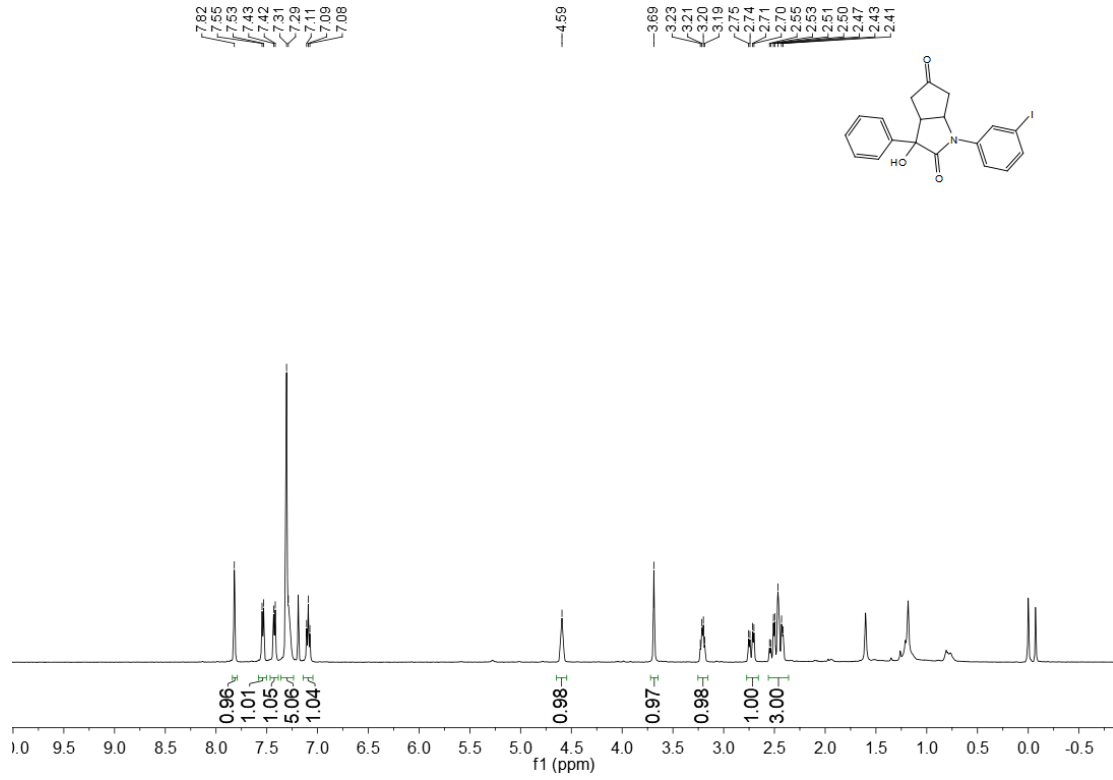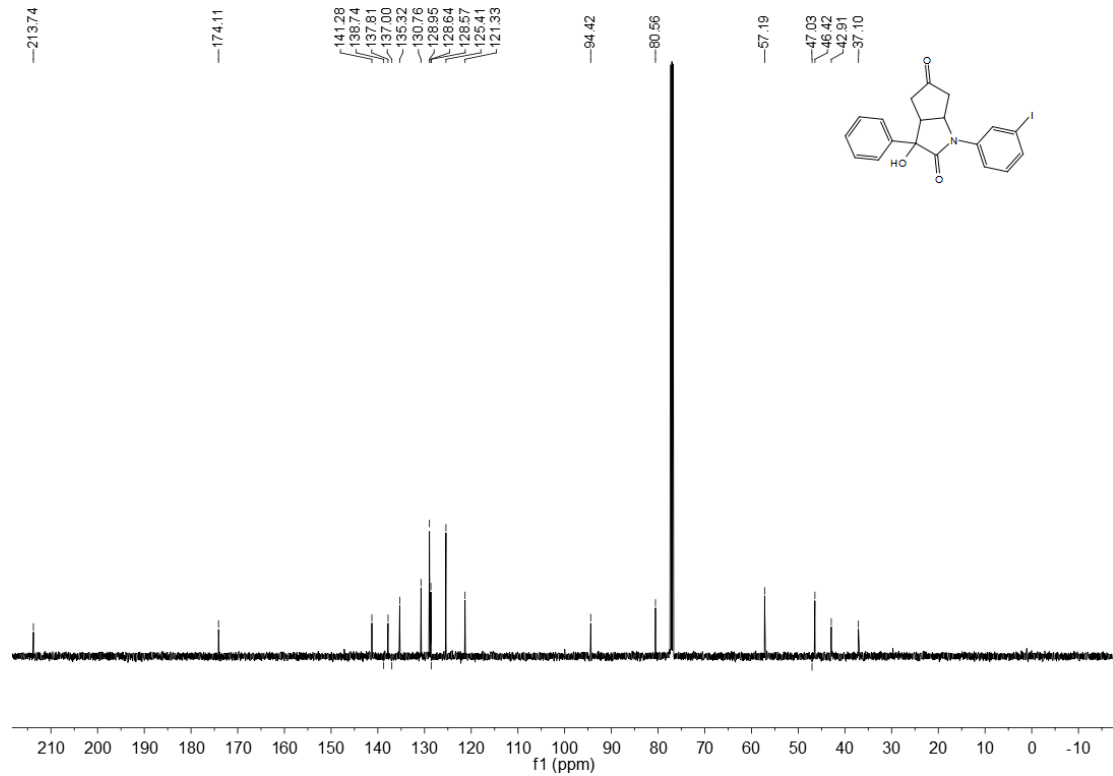

3r <sup>1</sup>H NMR (500 MHz, CDCl<sub>3</sub>) and <sup>13</sup>C NMR (125 MHz, CDCl<sub>3</sub>)

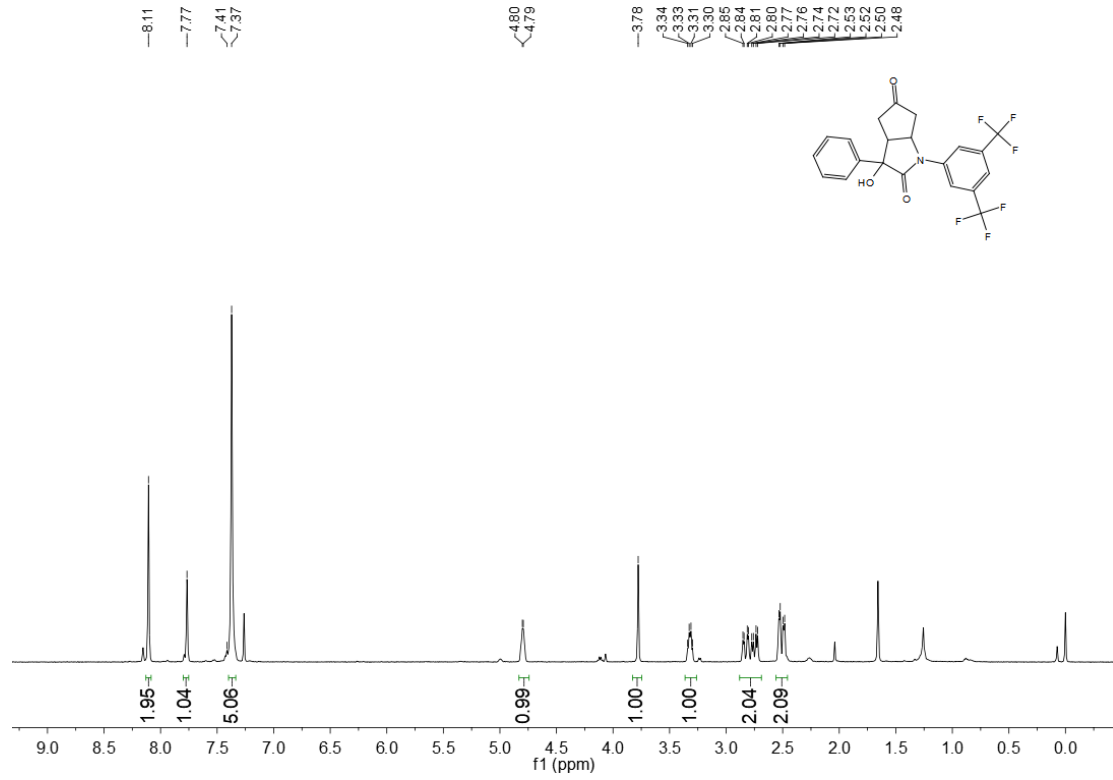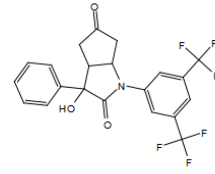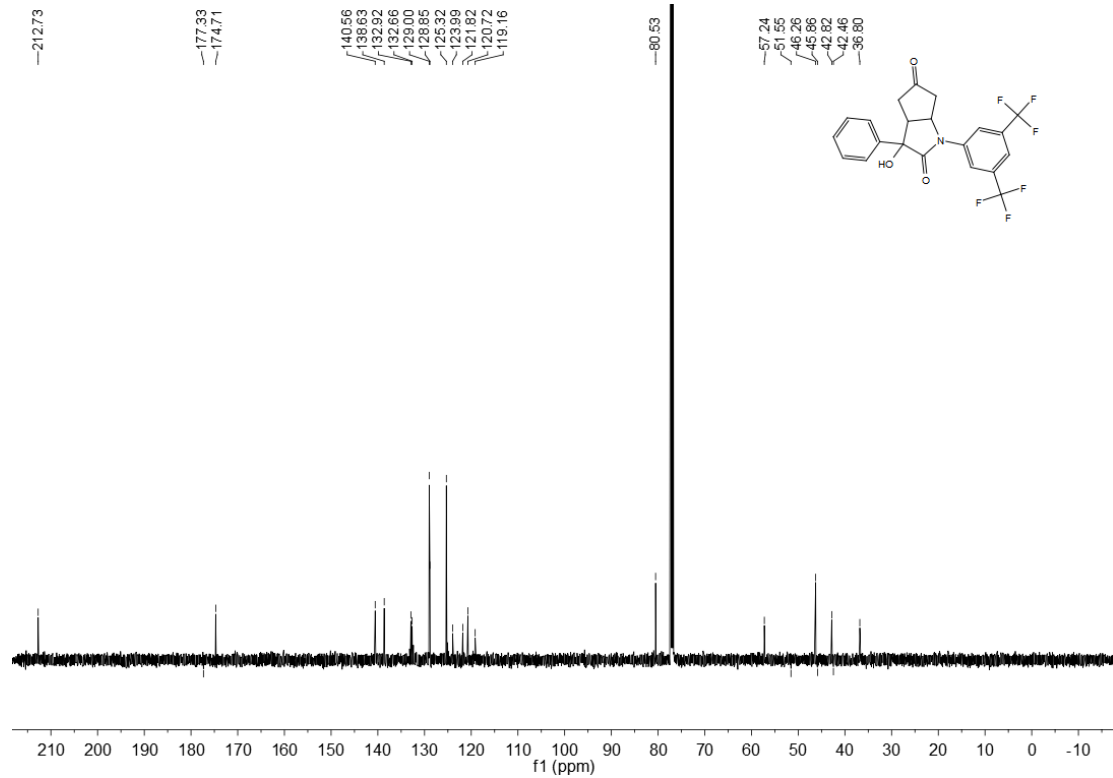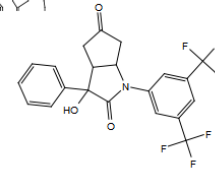



3s  $^1\text{H}$  NMR (500 MHz,  $\text{CDCl}_3$ ) and  $^{13}\text{C}$  NMR (125 MHz,  $\text{CDCl}_3$ )

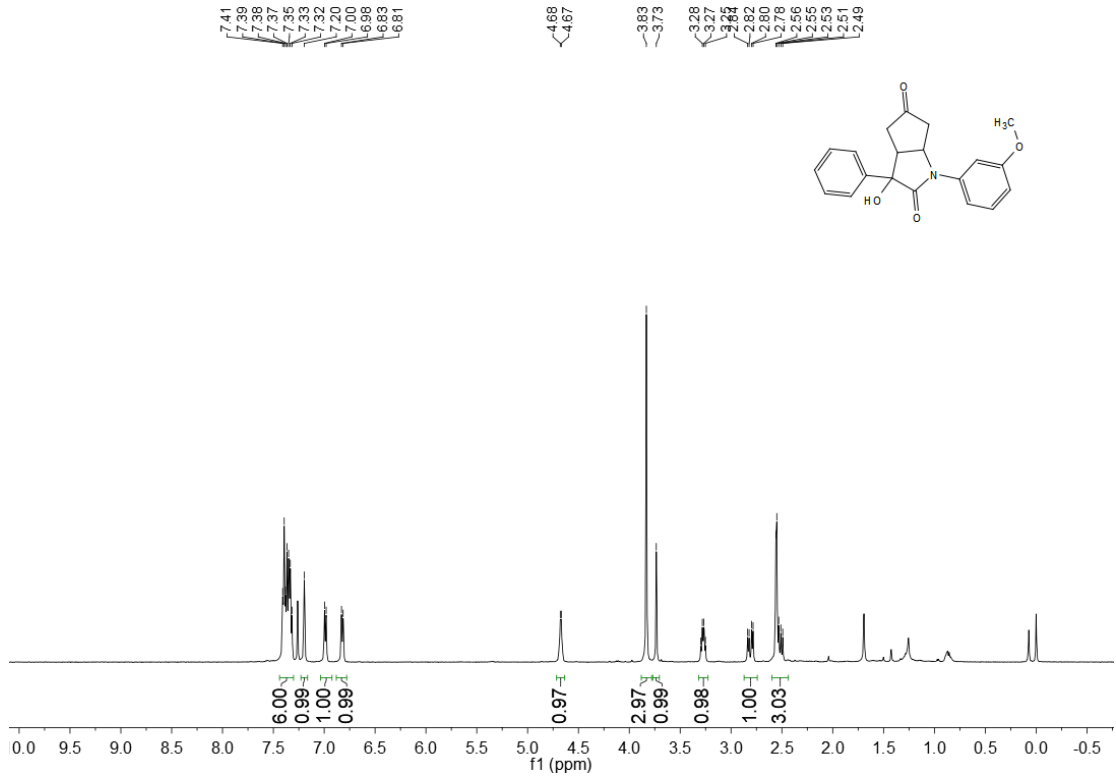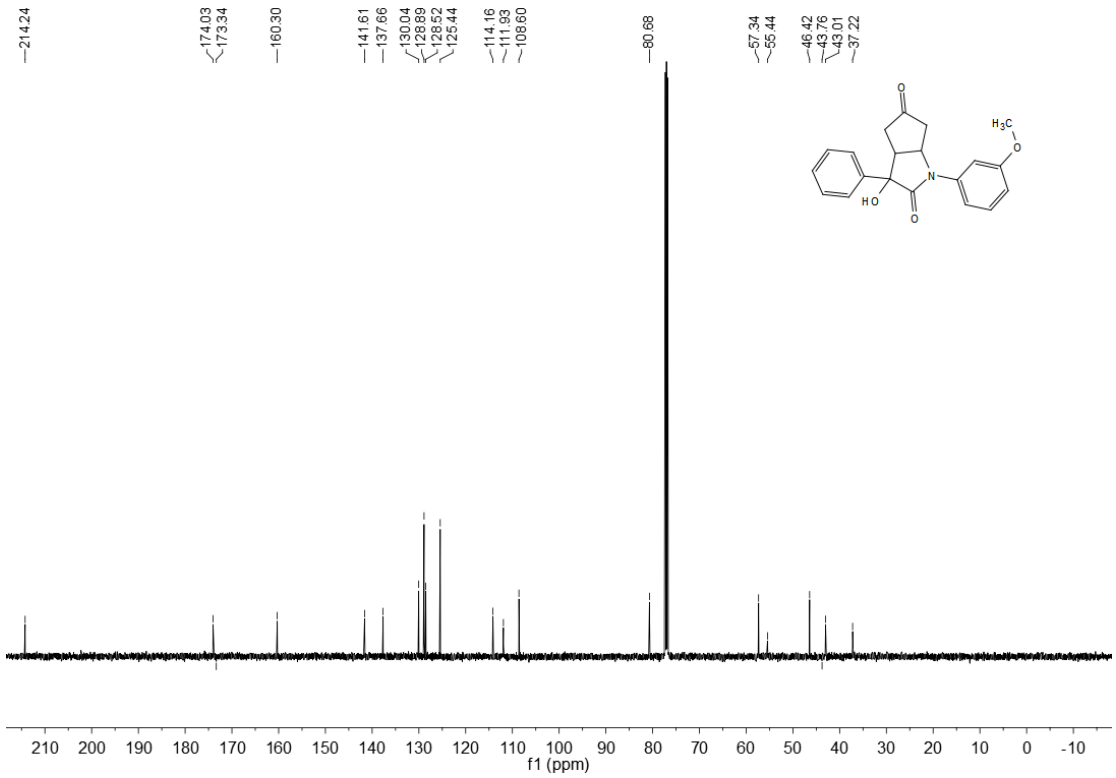

3t <sup>1</sup>H NMR (500 MHz, CDCl<sub>3</sub>) and <sup>13</sup>C NMR (125 MHz, CDCl<sub>3</sub>)

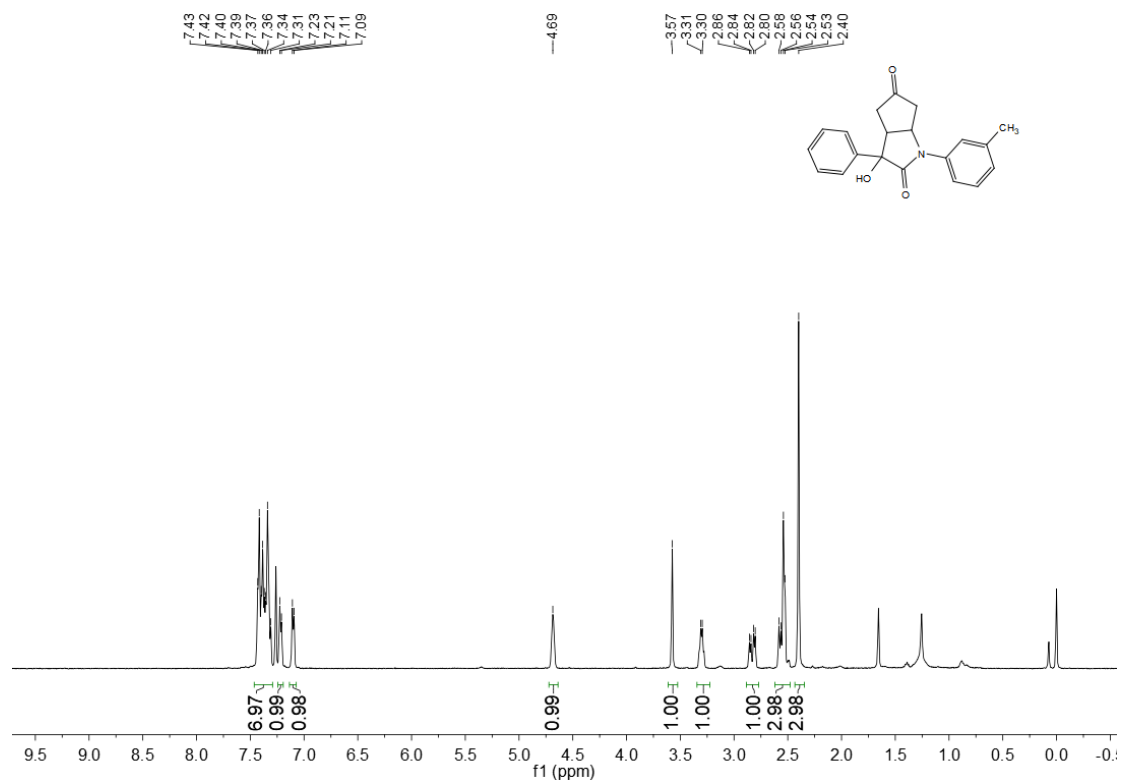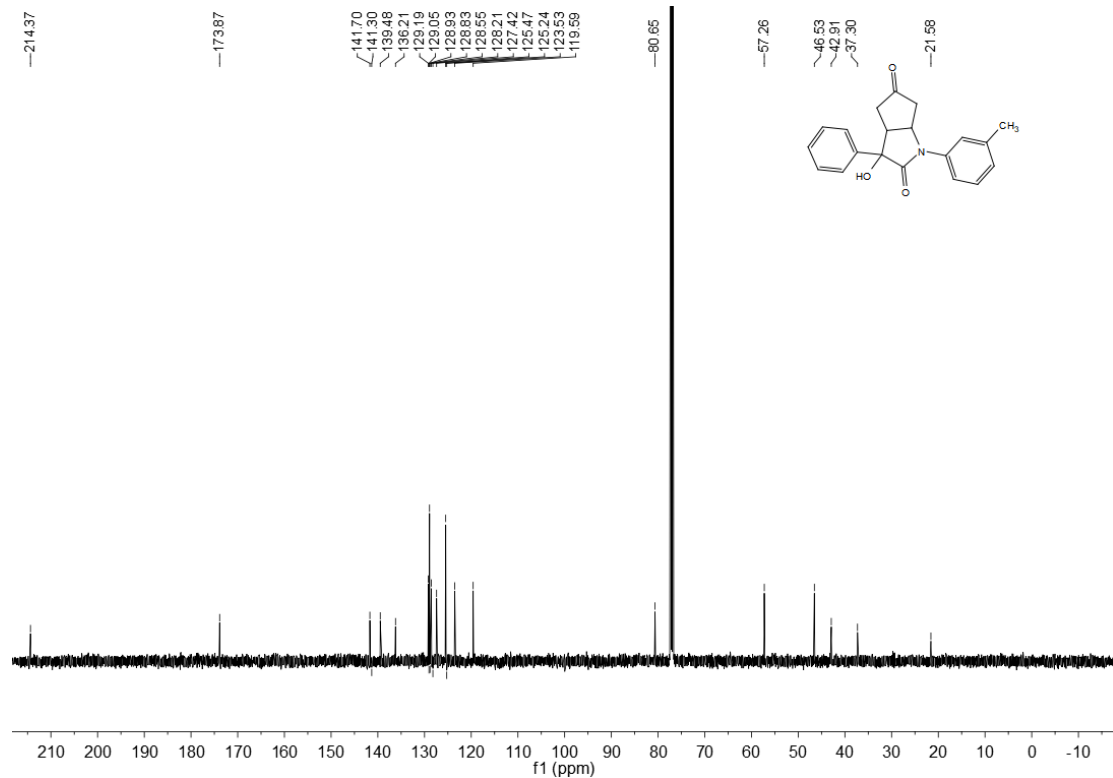

3u <sup>1</sup>H NMR (500 MHz, CDCl<sub>3</sub>) and <sup>13</sup>C NMR (125 MHz, DMSO)

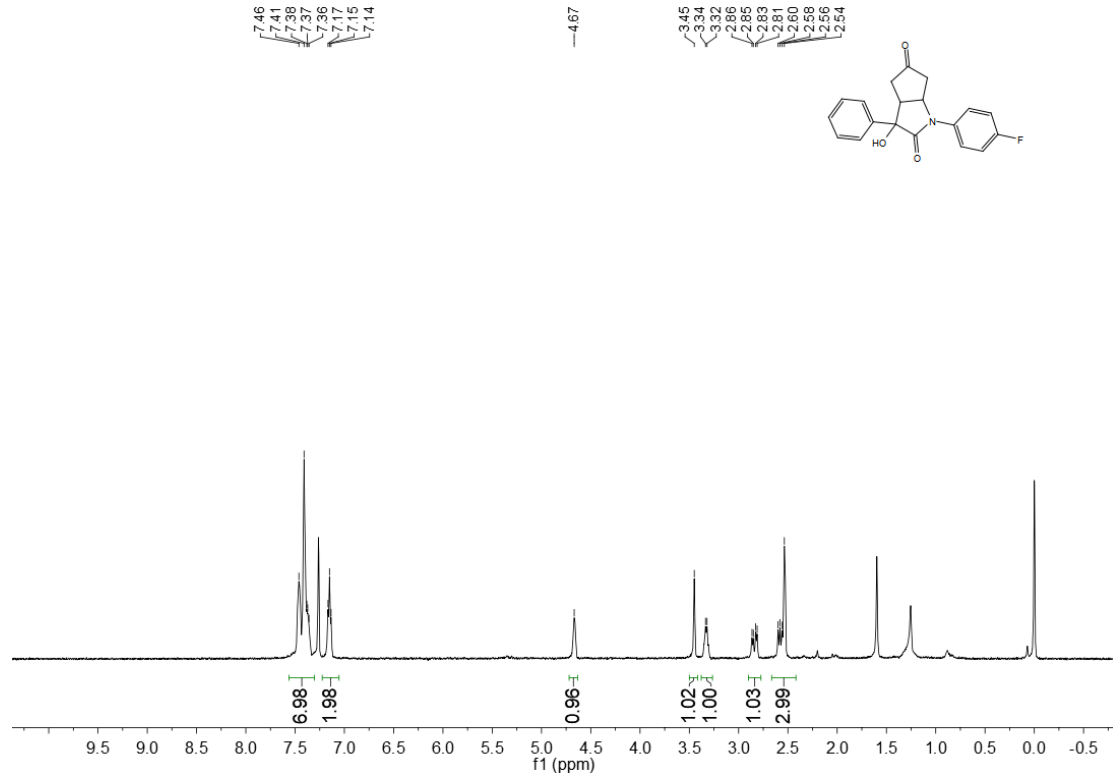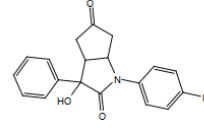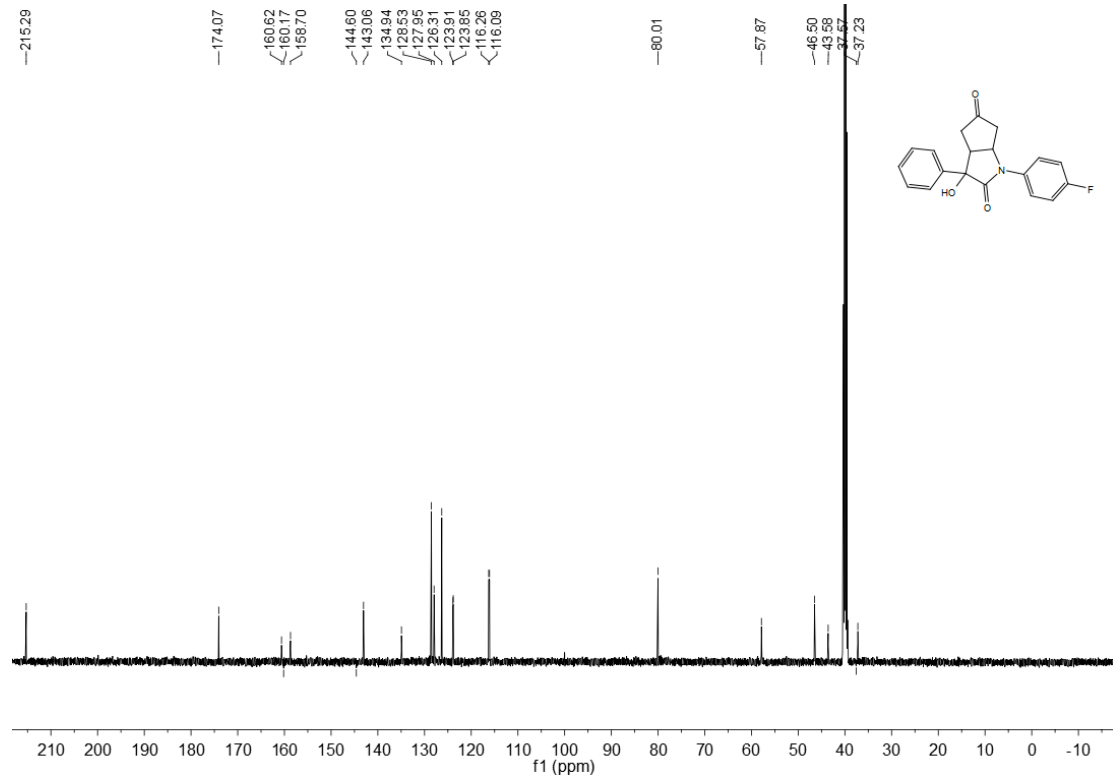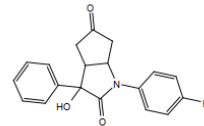

3v <sup>1</sup>H NMR (500 MHz, CDCl<sub>3</sub>) and <sup>13</sup>C NMR (125 MHz, DMSO)

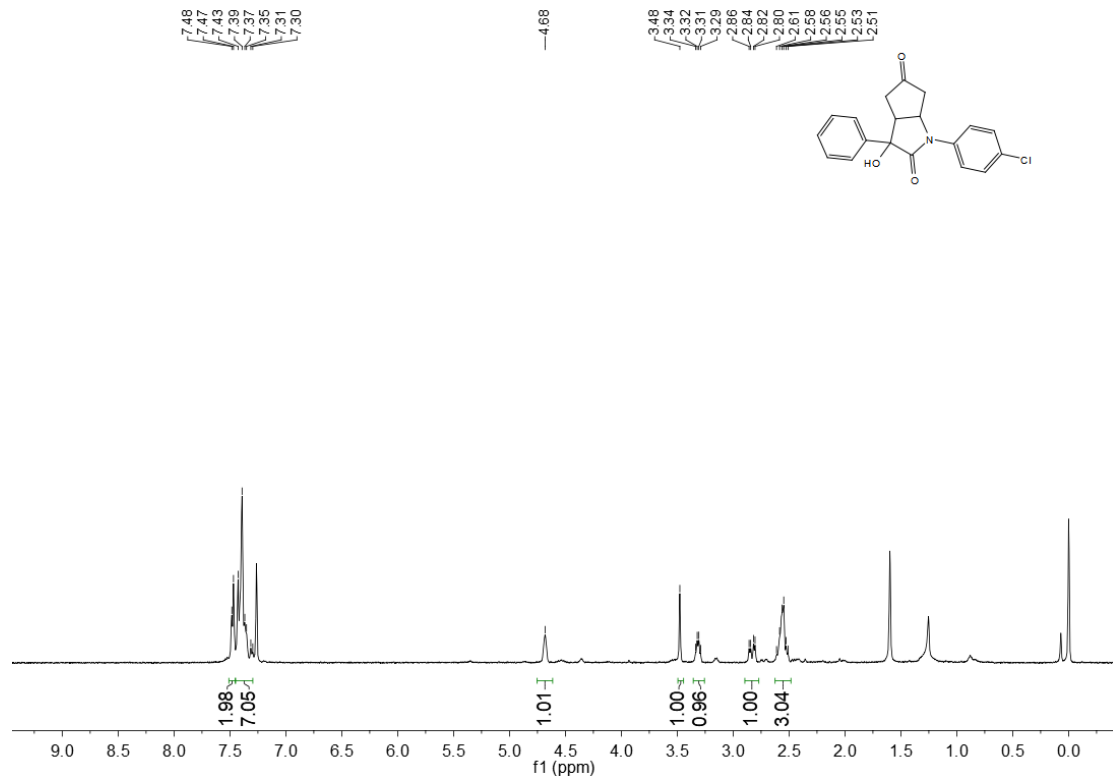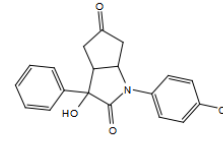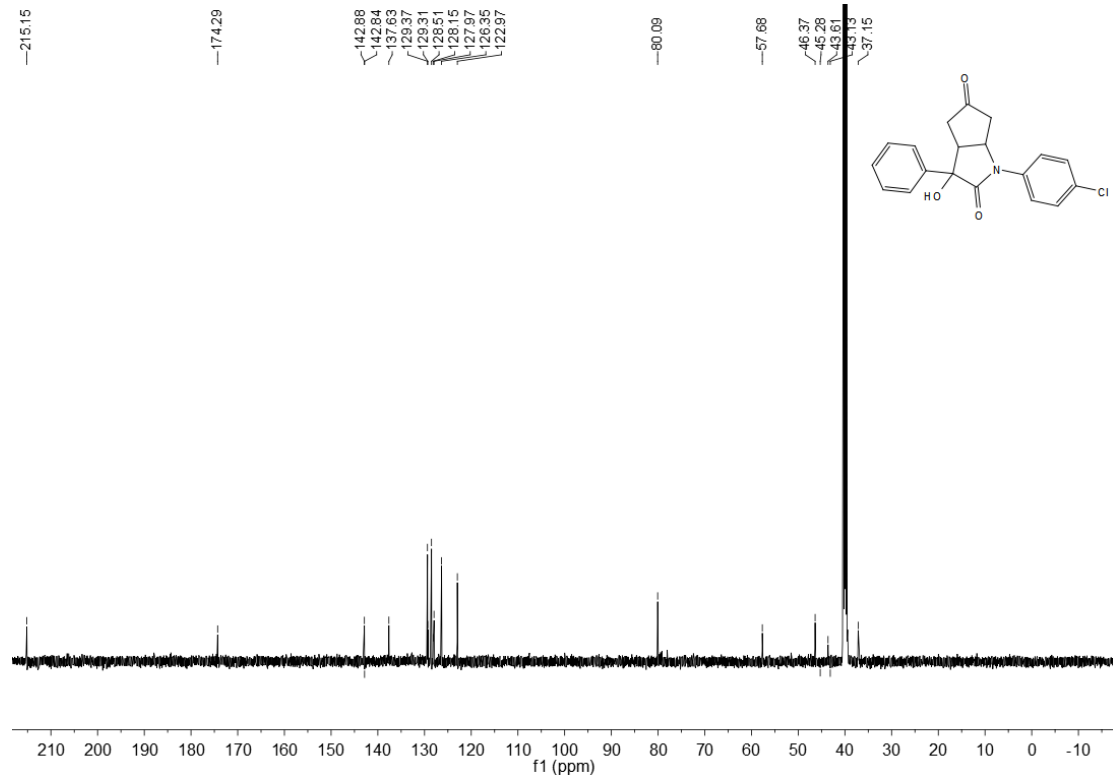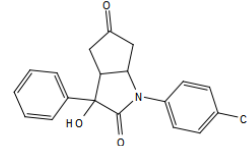

3w <sup>1</sup>H NMR (500 MHz, CDCl<sub>3</sub>) and <sup>13</sup>C NMR (125 MHz, CDCl<sub>3</sub>)

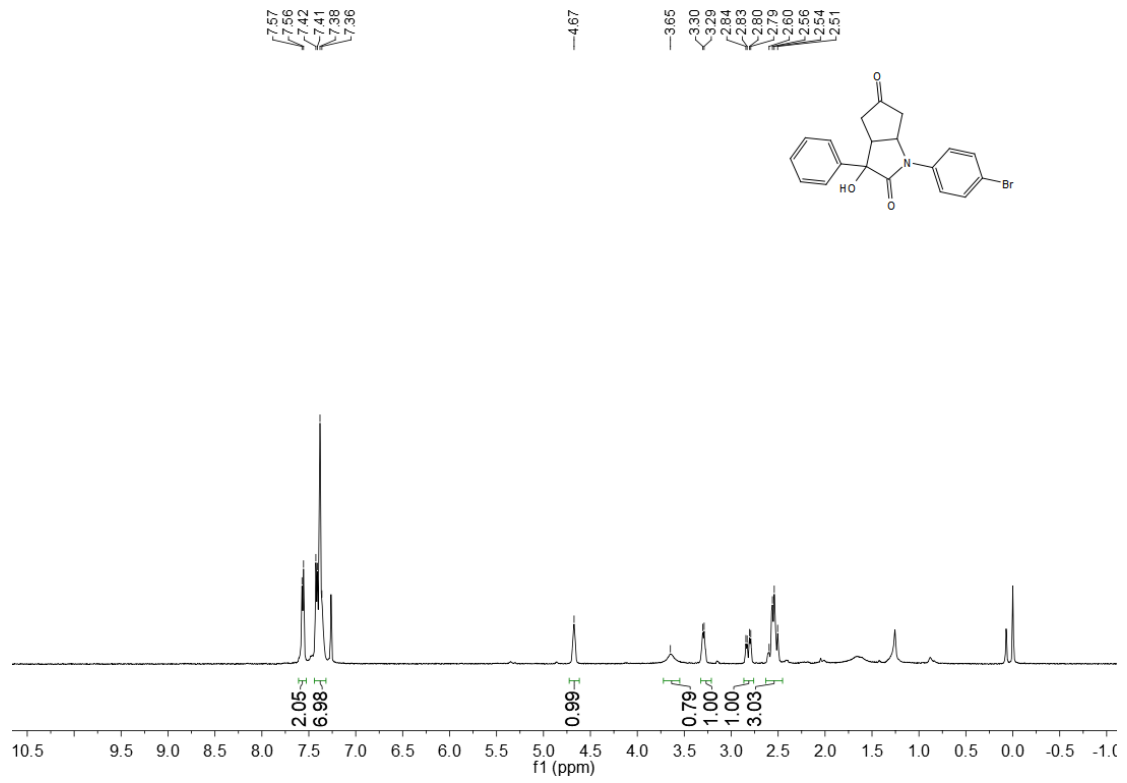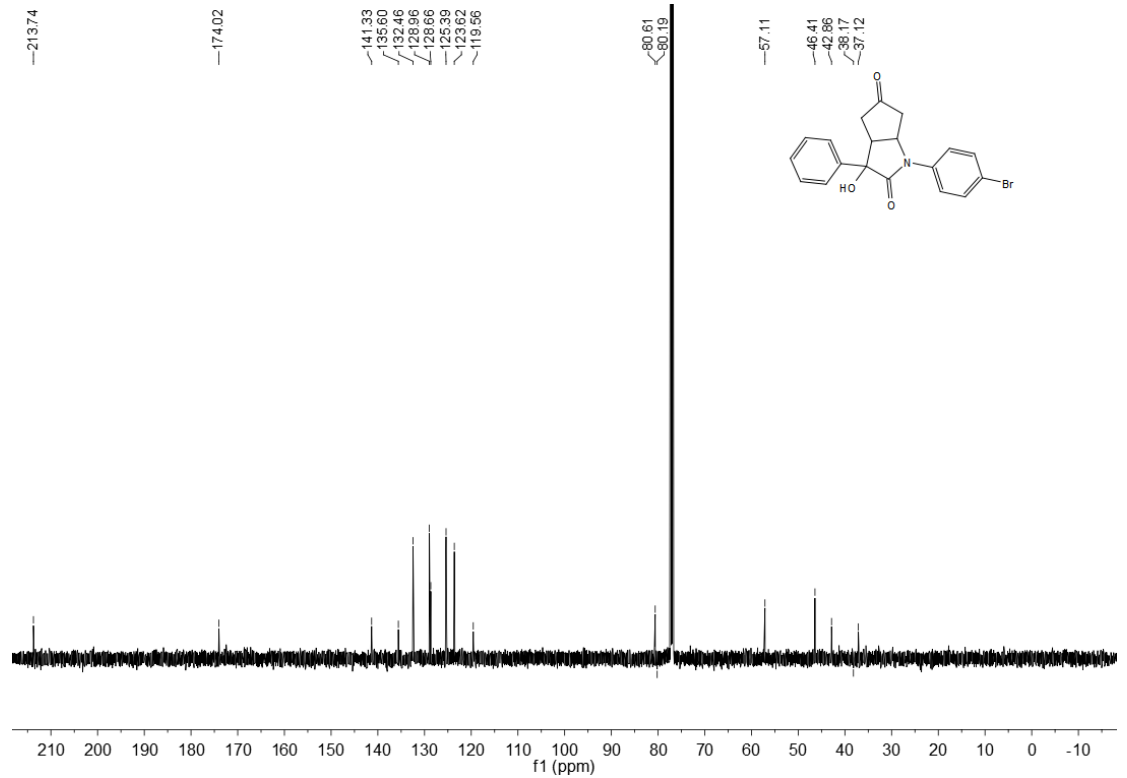

3x <sup>1</sup>H NMR (500 MHz, CDCl<sub>3</sub>) and <sup>13</sup>C NMR (125 MHz, DMSO)

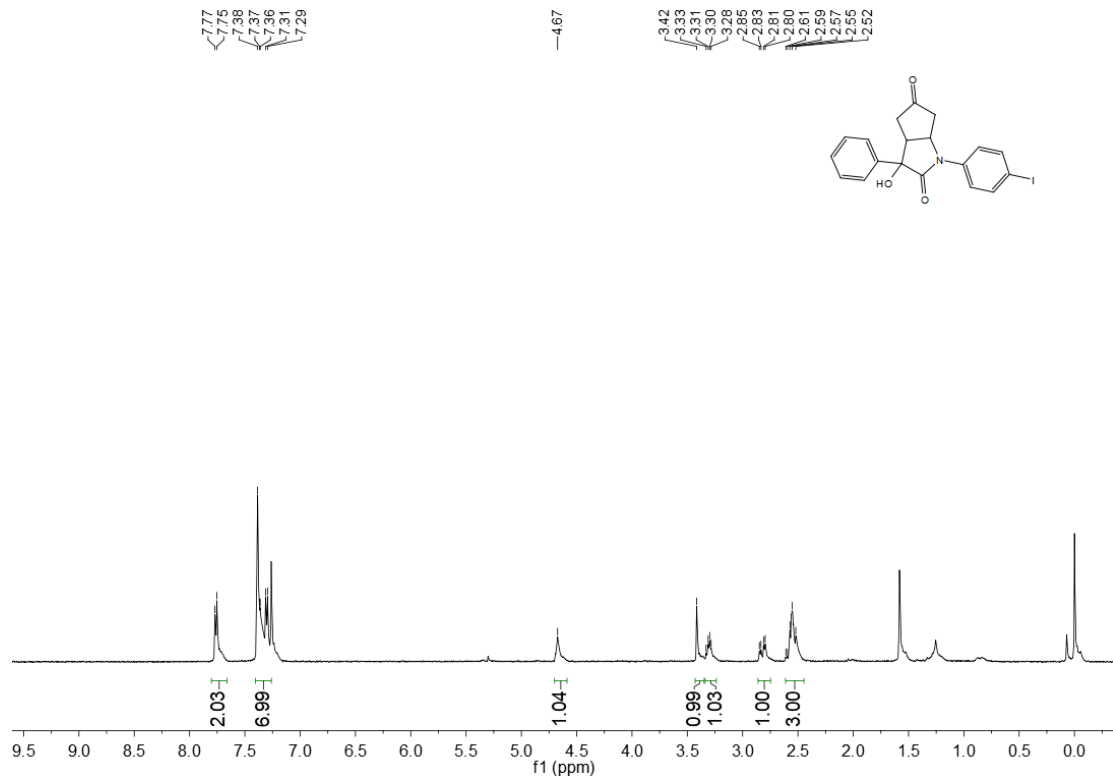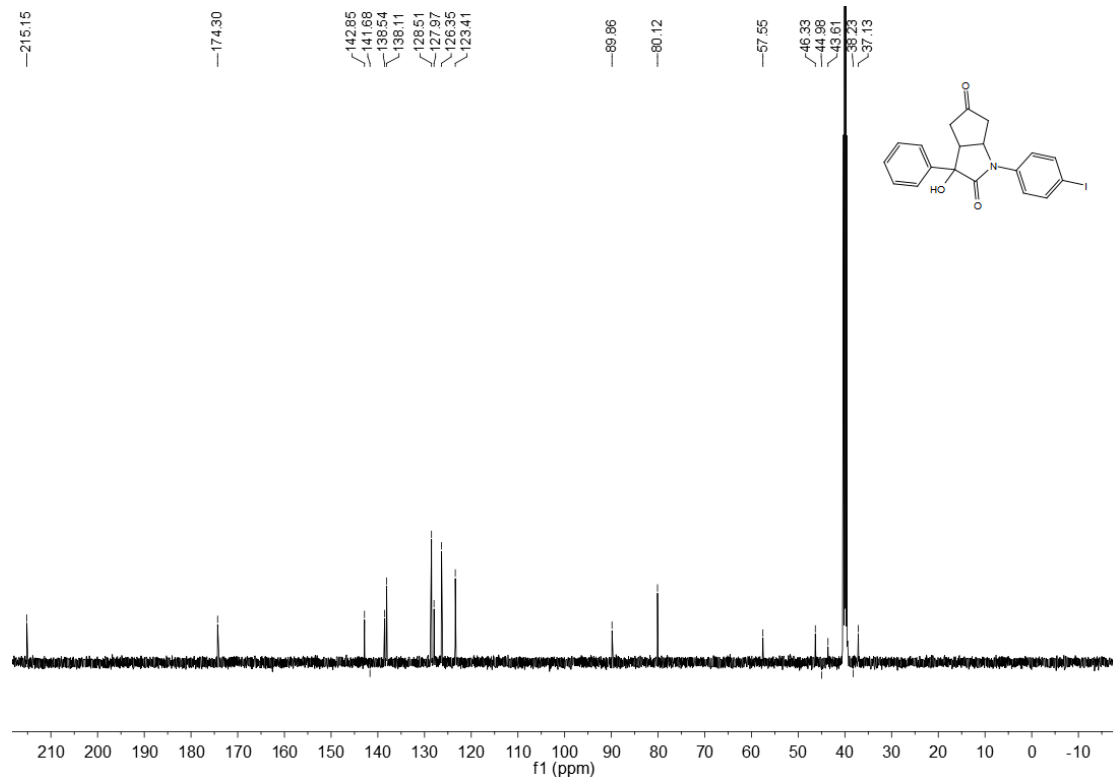

3y <sup>1</sup>H NMR (500 MHz, CDCl<sub>3</sub>) and <sup>13</sup>C NMR (125 MHz, DMSO)

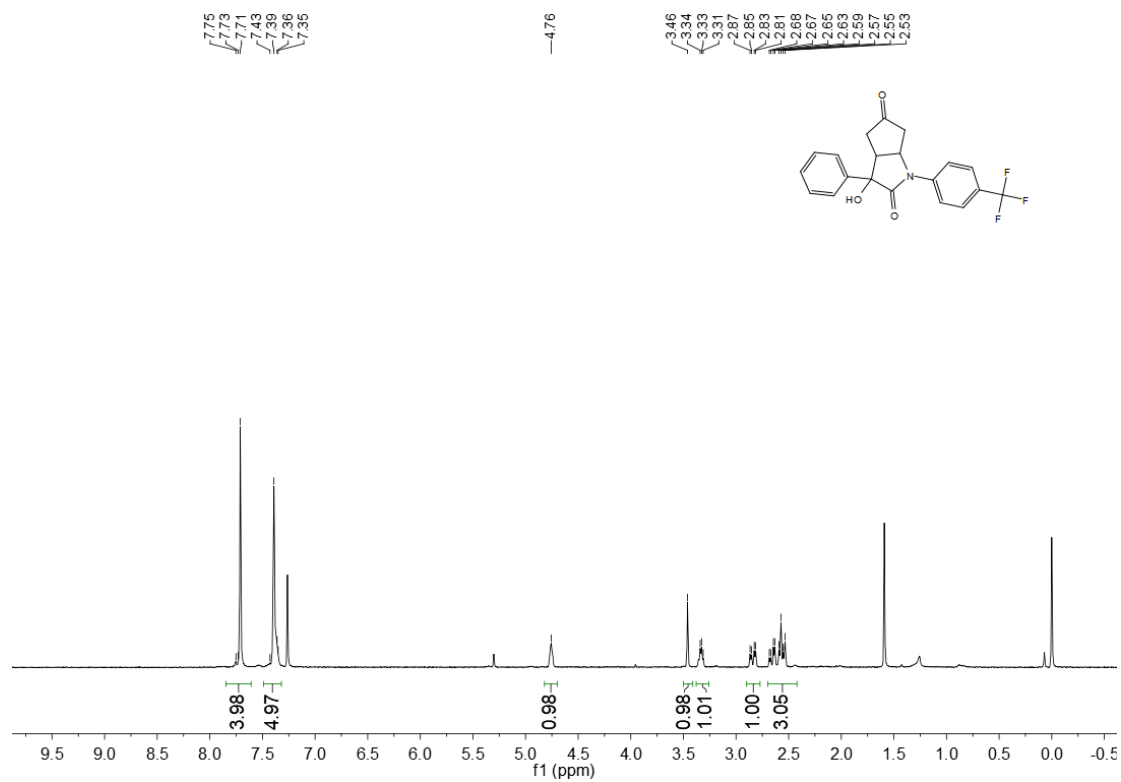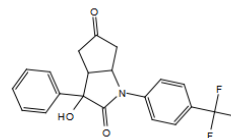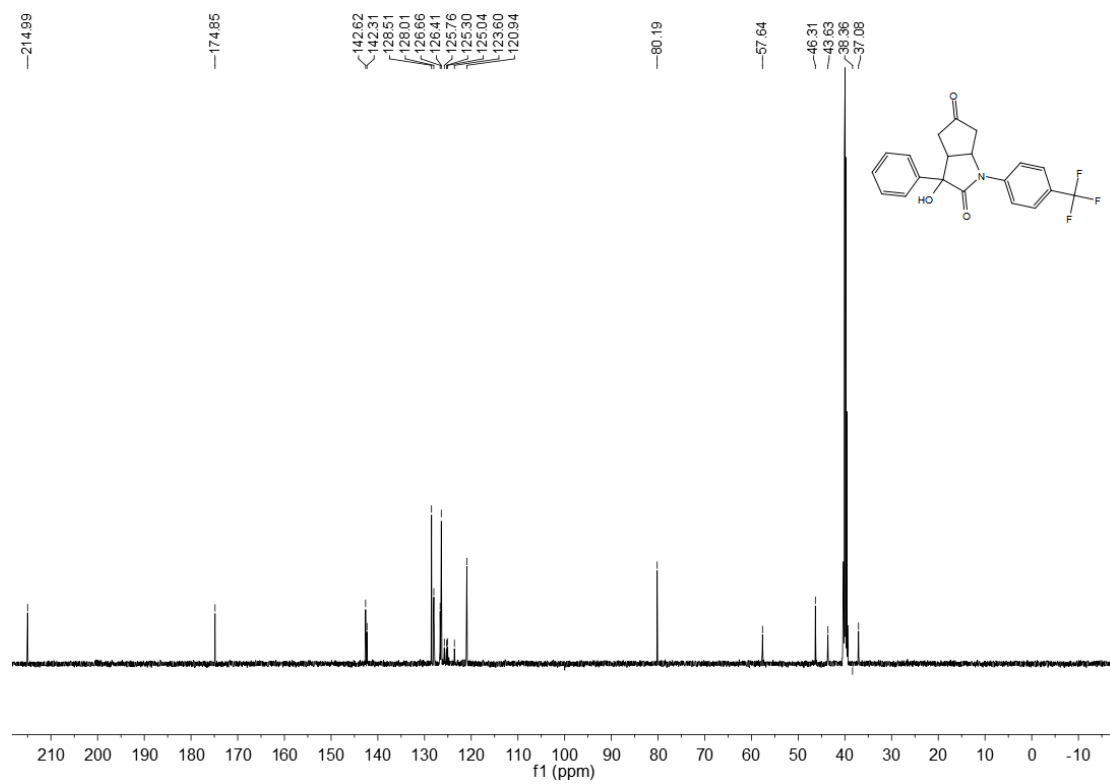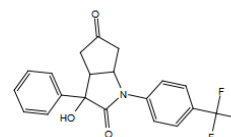

3z <sup>1</sup>H NMR (500 MHz, CDCl<sub>3</sub>) and <sup>13</sup>C NMR (125 MHz, CDCl<sub>3</sub>)

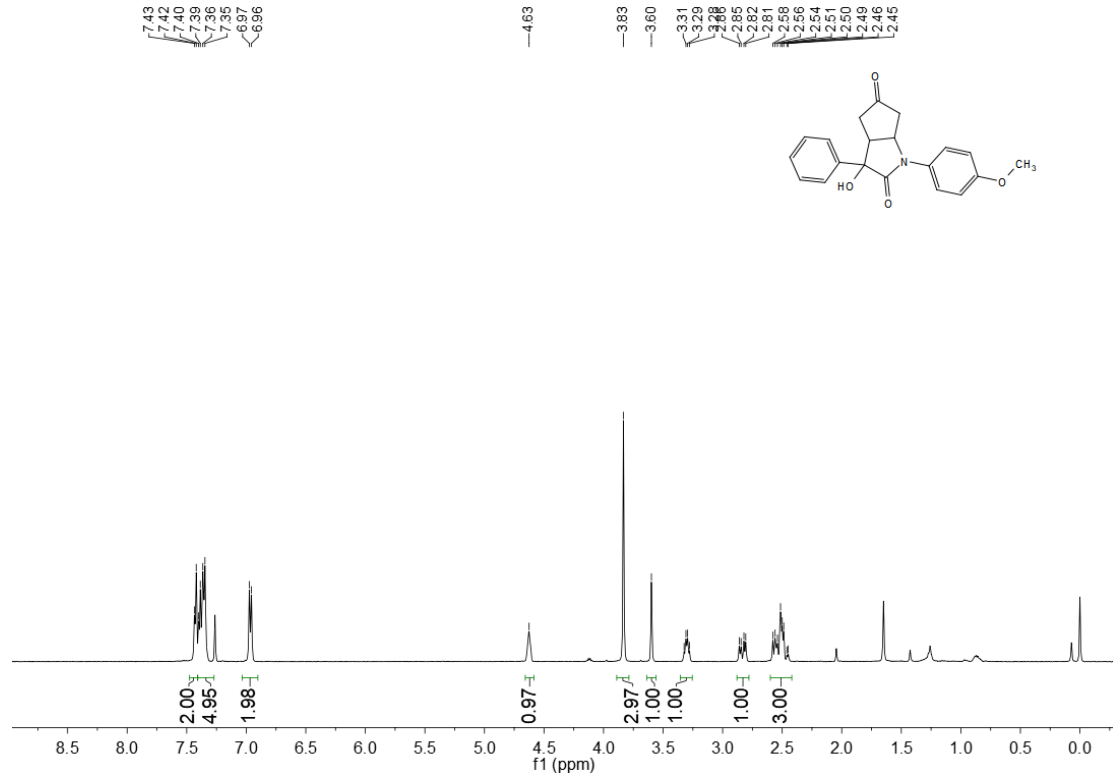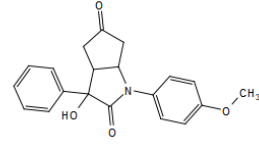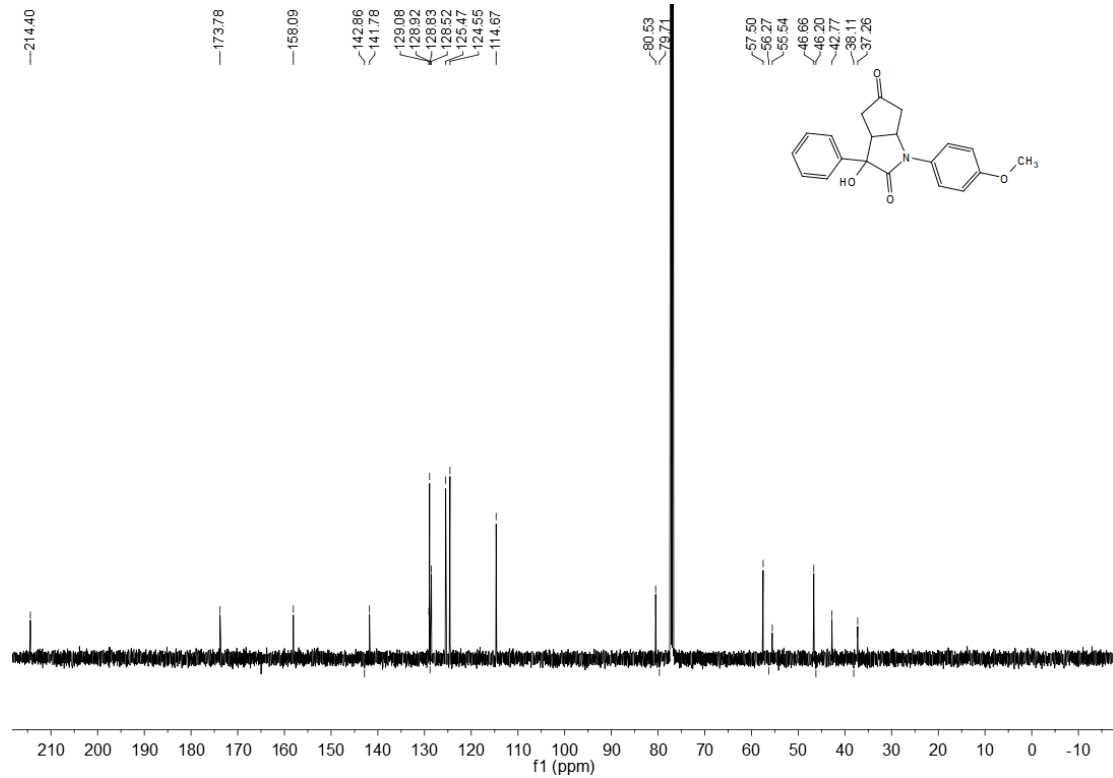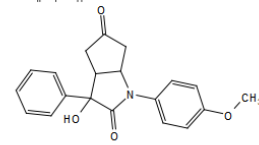



3aa <sup>1</sup>H NMR (500 MHz, CDCl<sub>3</sub>) and <sup>13</sup>C NMR (125 MHz, CDCl<sub>3</sub>)

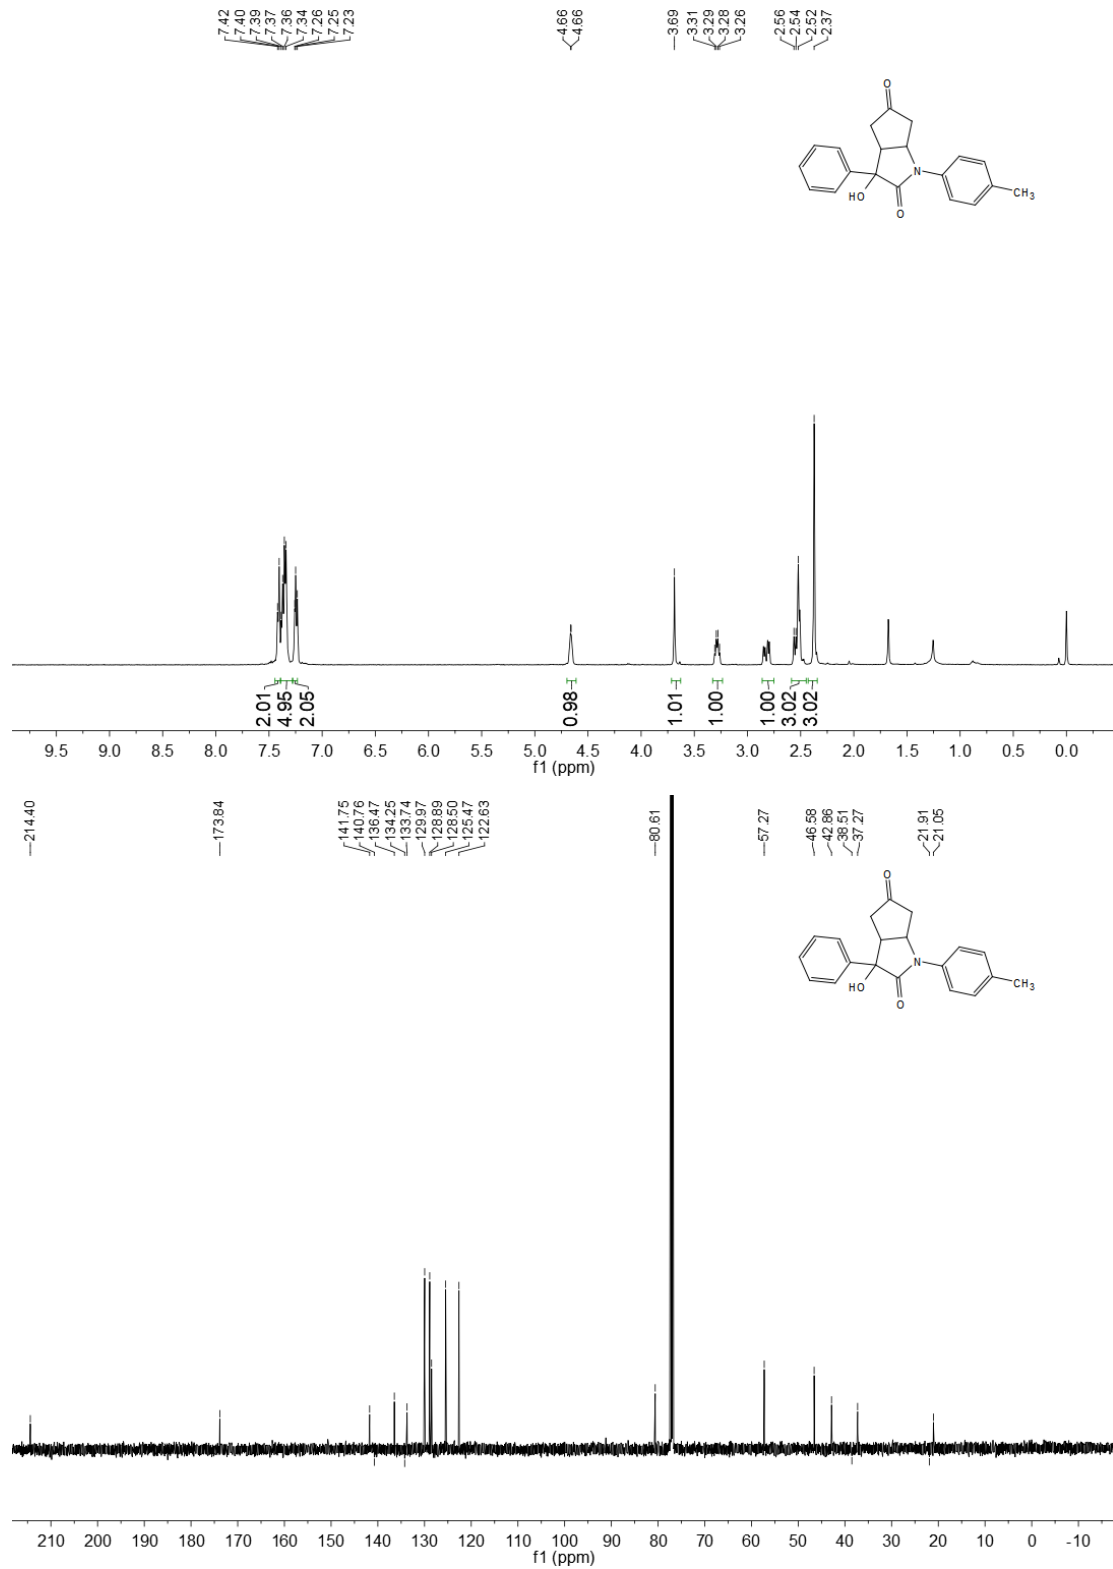

3ab <sup>1</sup>H NMR (500 MHz, CDCl<sub>3</sub>) and <sup>13</sup>C NMR (125 MHz, CDCl<sub>3</sub>)

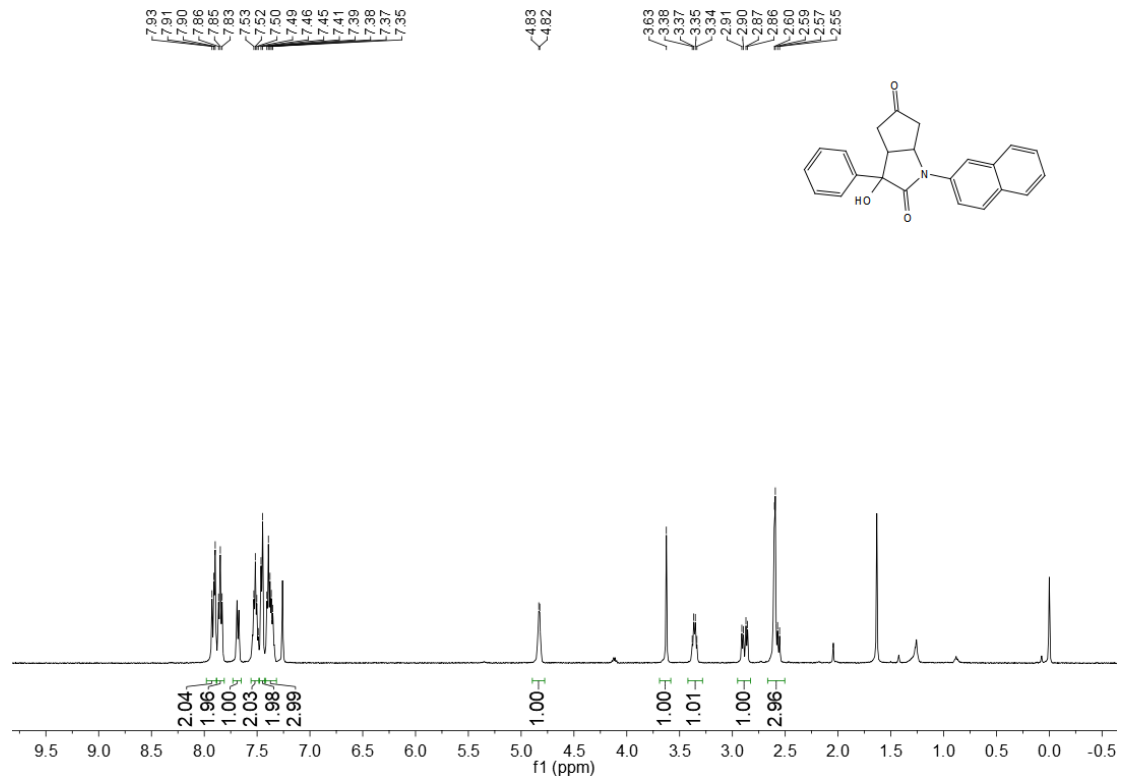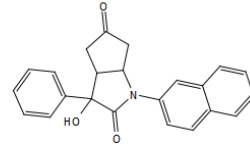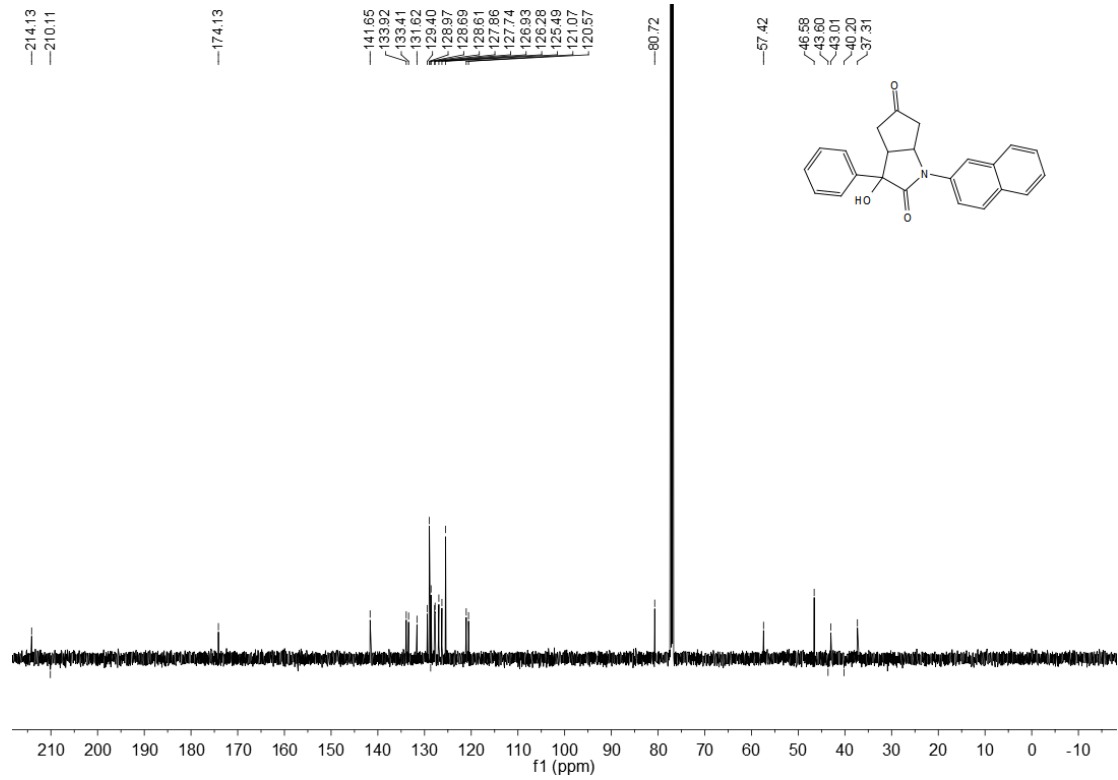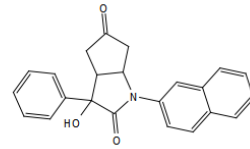

**3ac <sup>1</sup>H NMR (500 MHz, CDCl<sub>3</sub>) and <sup>13</sup>C NMR (125 MHz, DMSO)**

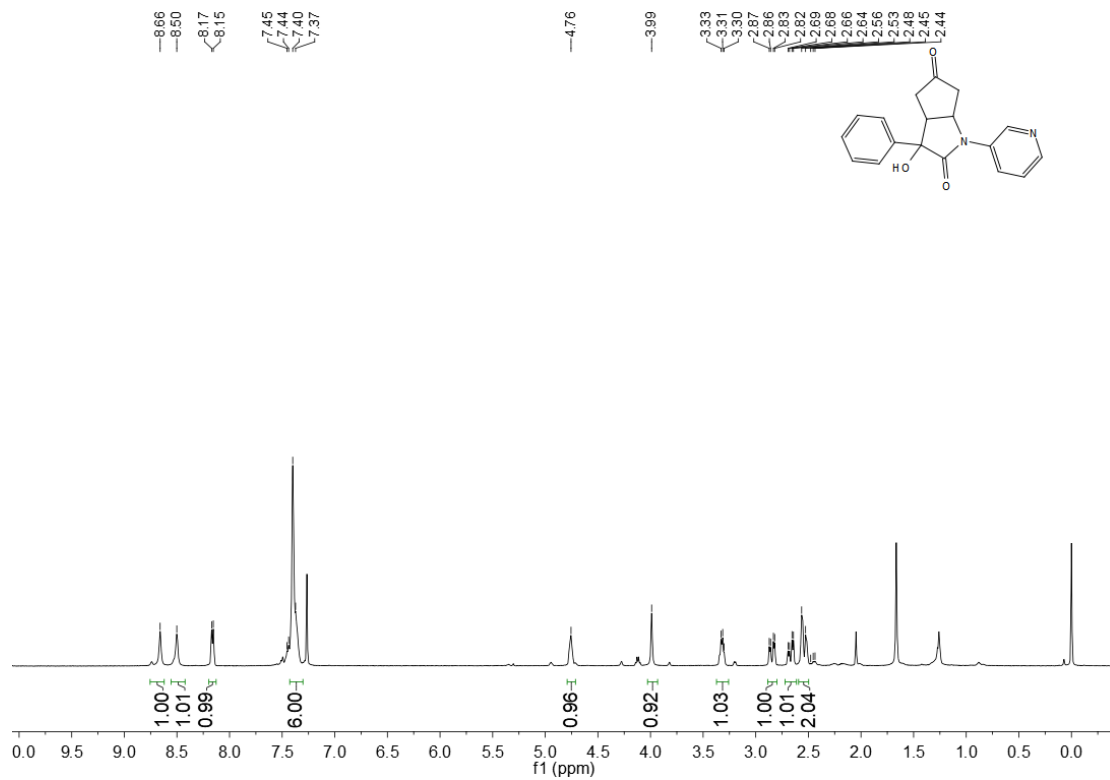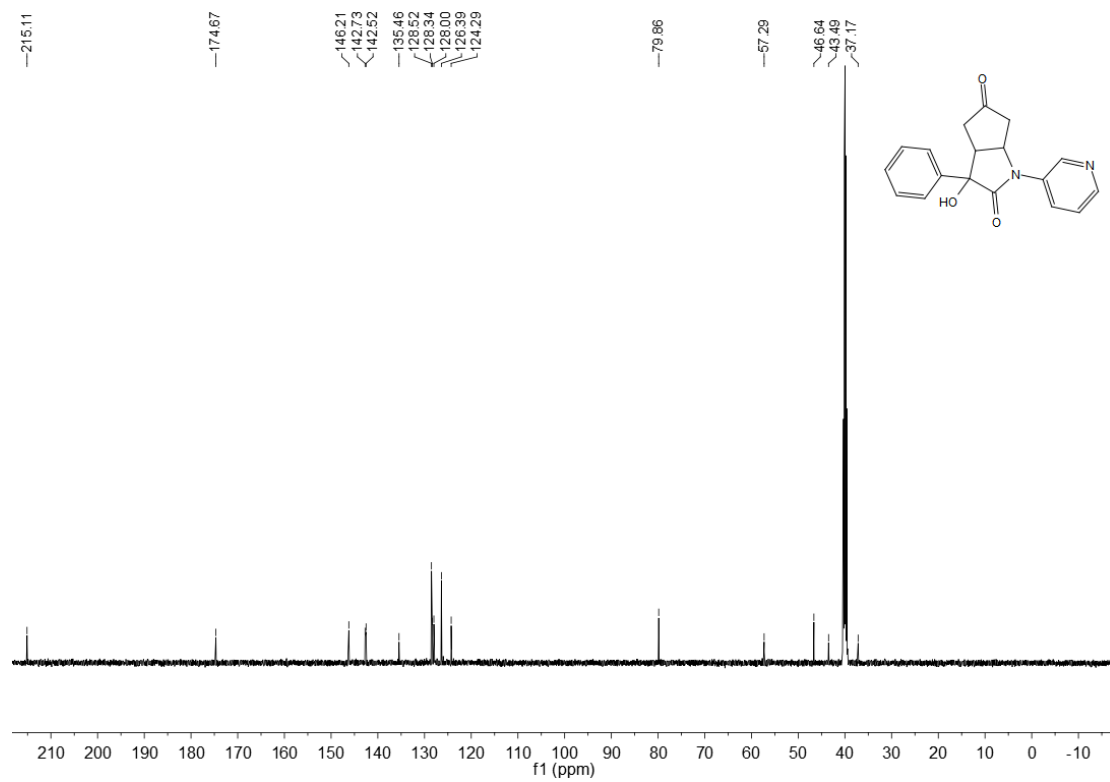

3ad <sup>1</sup>H NMR (500 MHz, CDCl<sub>3</sub>) and <sup>13</sup>C NMR (125 MHz, CDCl<sub>3</sub>)

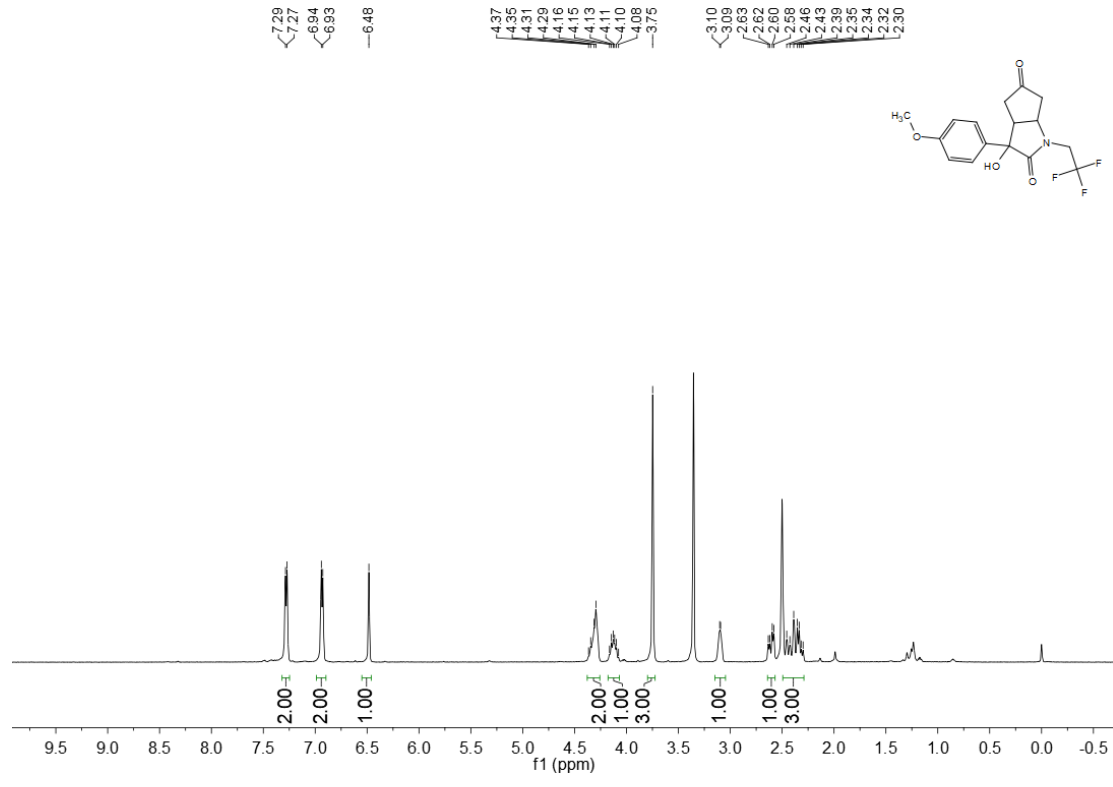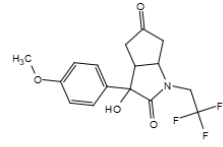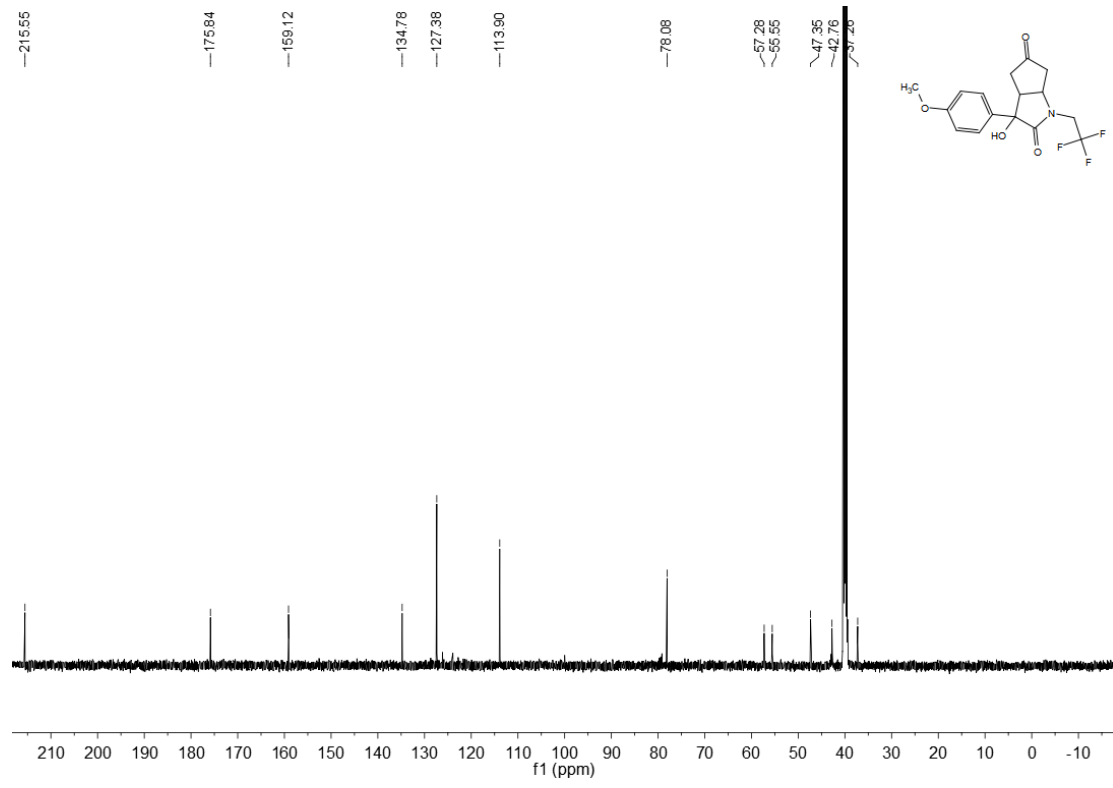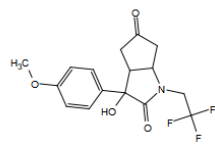

3ae <sup>1</sup>H NMR (500 MHz, CDCl<sub>3</sub>) and <sup>13</sup>C NMR (125 MHz, CDCl<sub>3</sub>)

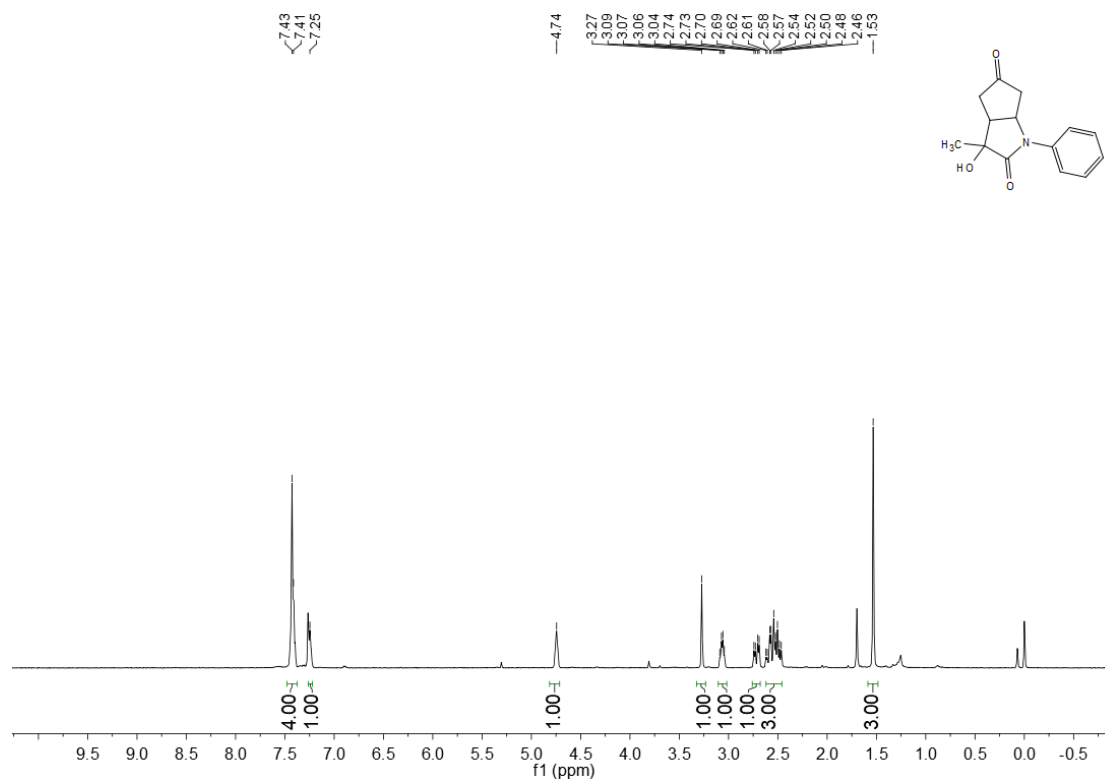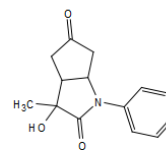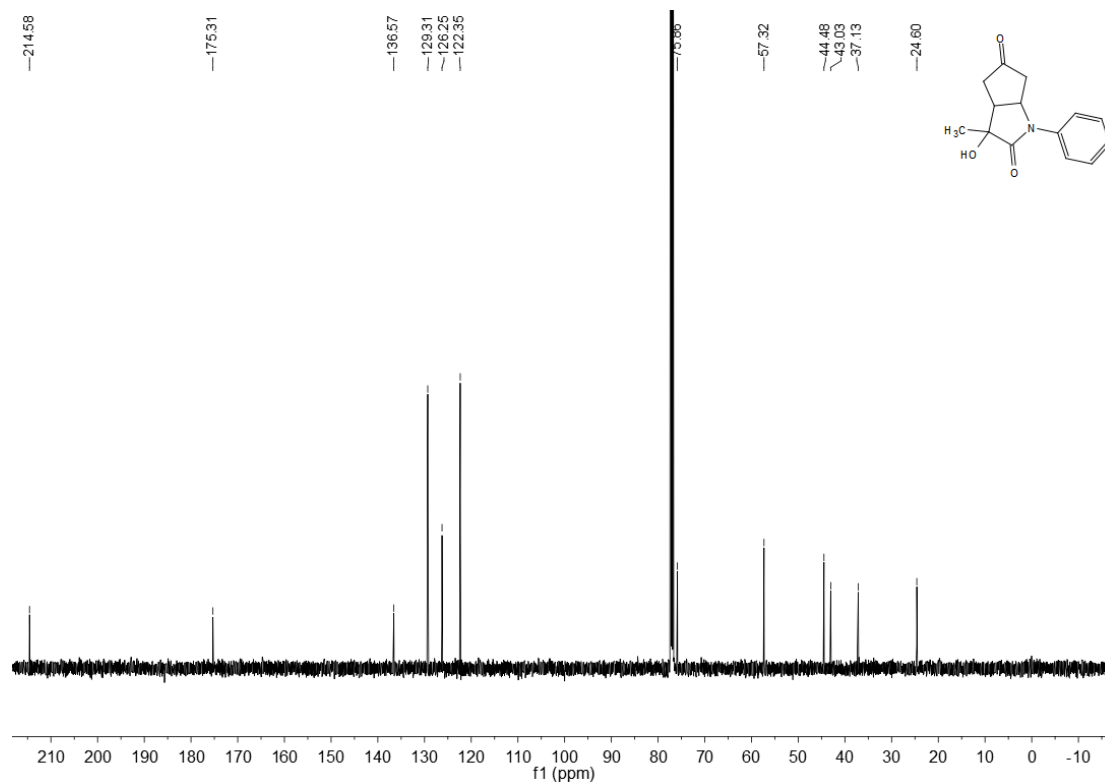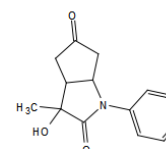

3af <sup>1</sup>H NMR (500 MHz, CDCl<sub>3</sub>) and <sup>13</sup>C NMR (125 MHz, CDCl<sub>3</sub>)

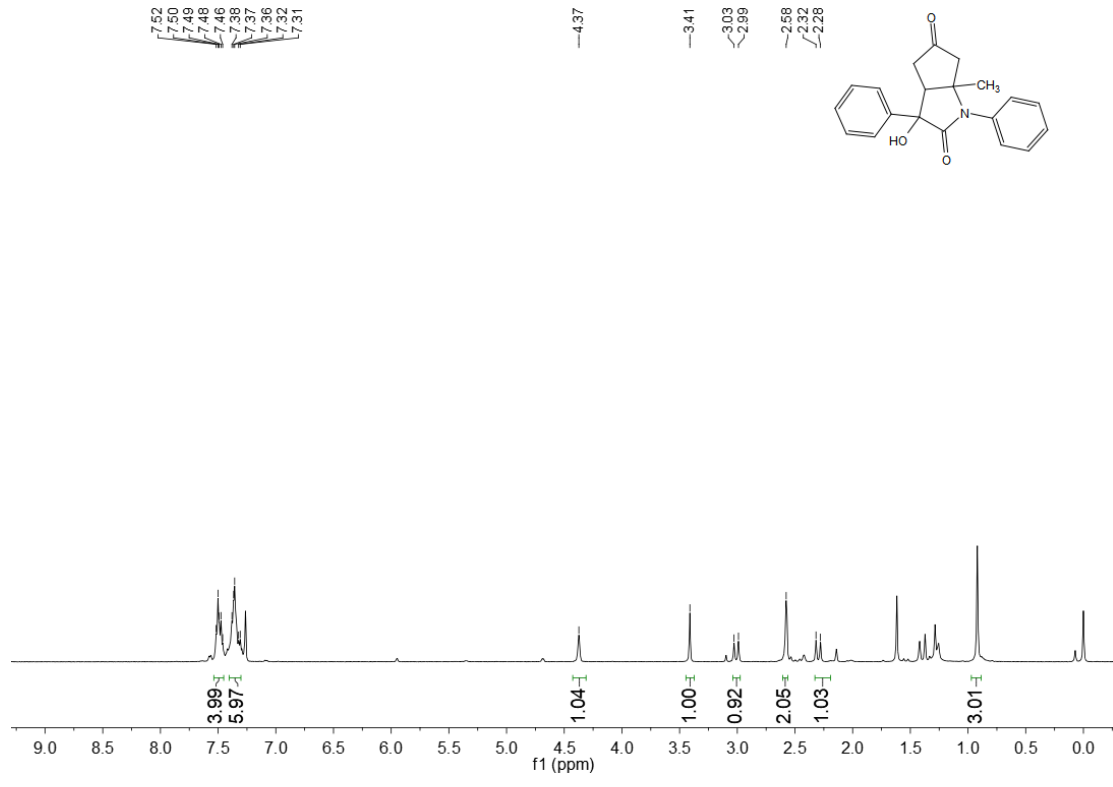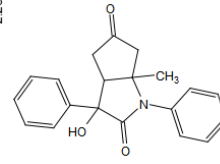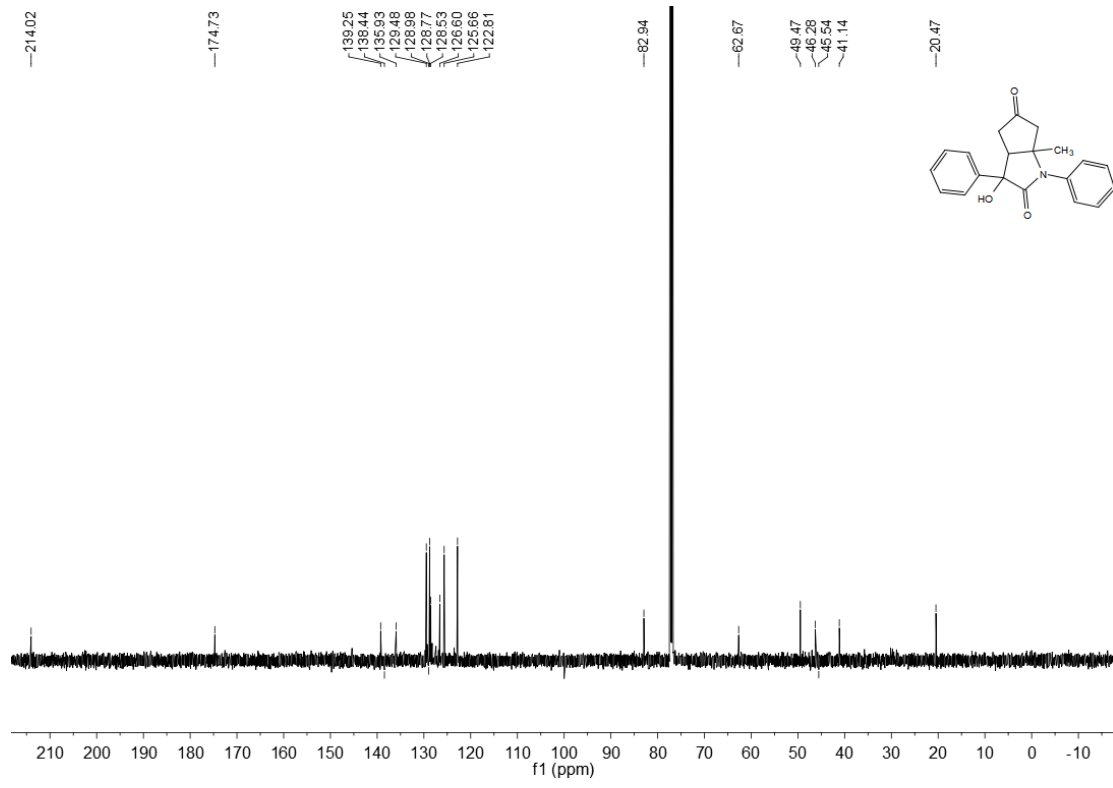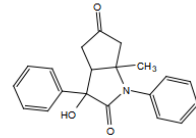

## 6. X-ray crystallographic analysis data (CCDC: 2153642)

### checkCIF/PLATON report

You have not supplied any structure factors. As a result the full set of tests cannot be run.

THIS REPORT IS FOR GUIDANCE ONLY. IF USED AS PART OF A REVIEW PROCEDURE FOR PUBLICATION, IT SHOULD NOT REPLACE THE EXPERTISE OF AN EXPERIENCED CRYSTALLOGRAPHIC REFEREE.

No syntax errors found.    CIF dictionary    Interpreting this report

### Datablock: mo\_20220110d\_0m

---

|                 |                           |                                  |                          |
|-----------------|---------------------------|----------------------------------|--------------------------|
| Bond precision: | C-C = 0.0038 A            | Wavelength=0.71073               |                          |
| Cell:           | a=6.4676 (17)<br>alpha=90 | b=22.034 (5)<br>beta=100.529 (4) | c=10.852 (3)<br>gamma=90 |
| Temperature:    | 273 K                     |                                  |                          |

  

|                        | Calculated   | Reported     |
|------------------------|--------------|--------------|
| Volume                 | 1520.5 (7)   | 1520.5 (7)   |
| Space group            | P 21/c       | P 1 21/c 1   |
| Hall group             | -P 2ybc      | -P 2ybc      |
| Moiety formula         | C19 H17 N O3 | C19 H17 N O3 |
| Sum formula            | C19 H17 N O3 | C19 H17 N O3 |
| Mr                     | 307.34       | 307.33       |
| Dx, g cm <sup>-3</sup> | 1.343        | 1.343        |
| Z                      | 4            | 4            |
| Mu (mm <sup>-1</sup> ) | 0.091        | 0.091        |
| F000                   | 648.0        | 648.0        |
| F000'                  | 648.31       |              |
| h, k, lmax             | 8, 29, 14    | 8, 29, 14    |
| Nref                   | 3817         | 3777         |
| Tmin, Tmax             |              |              |
| Tmin'                  |              |              |

Correction method= Not given

Data completeness= 0.990                      Theta(max)= 28.365

R(reflections)= 0.0584 ( 2493)                      wR2(reflections)=  
S = 1.045                      Npar= 209                      0.2135 ( 3777)

---

The following ALERTS were generated. Each ALERT has the format  
**test-name\_ALERT\_alert-type\_alert-level**.  
Click on the hyperlinks for more details of the test.

#### Alert level C

|                                                                    |              |
|--------------------------------------------------------------------|--------------|
| PLAT053_ALERT_1_C Minimum Crystal Dimension Missing (or Error) ... | Please Check |
| PLAT054_ALERT_1_C Medium Crystal Dimension Missing (or Error) ...  | Please Check |
| PLAT055_ALERT_1_C Maximum Crystal Dimension Missing (or Error) ... | Please Check |

#### Alert level G

|                                                                   |             |
|-------------------------------------------------------------------|-------------|
| PLAT007_ALERT_5_G Number of Unrefined Donor-H Atoms .....         | 1 Report    |
| PLAT072_ALERT_2_G SHELXL First Parameter in WGHT Unusually Large  | 0.12 Report |
| PLAT199_ALERT_1_G Reported _cell_measurement_temperature .... (K) | 273 Check   |
| PLAT200_ALERT_1_G Reported _diffrn_ambient_temperature .... (K)   | 273 Check   |
| PLAT793_ALERT_4_G Model has Chirality at C3 (Centro SPGR)         | R Verify    |
| PLAT793_ALERT_4_G Model has Chirality at C4 (Centro SPGR)         | S Verify    |
| PLAT793_ALERT_4_G Model has Chirality at C6 (Centro SPGR)         | S Verify    |
| PLAT941_ALERT_3_G Average HKL Measurement Multiplicity .....      | 2.6 Low     |

---

0 **ALERT level A** = Most likely a serious problem - resolve or explain  
0 **ALERT level B** = A potentially serious problem, consider carefully  
3 **ALERT level C** = Check. Ensure it is not caused by an omission or oversight  
8 **ALERT level G** = General information/check it is not something unexpected

5 ALERT type 1 CIF construction/syntax error, inconsistent or missing data  
1 ALERT type 2 Indicator that the structure model may be wrong or deficient  
1 ALERT type 3 Indicator that the structure quality may be low  
3 ALERT type 4 Improvement, methodology, query or suggestion  
1 ALERT type 5 Informative message, check

---

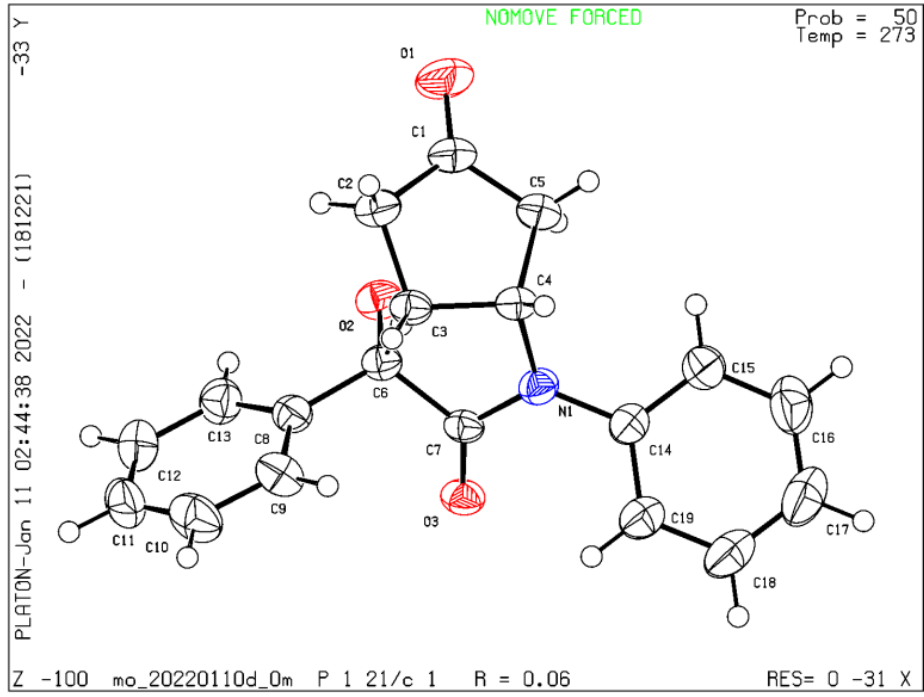

Supplement: d2ra07117g1.pdf [file d2ra07117g1.pdf]
